# Supplementary material for: Variations in soil chemical and physical properties explain basin-wide variations in Amazon forest soil carbon densities
Source: Copernicus journal article supplement (doi:10.5194/soil-2019-24), 2019-06-11
Supplement: Supplementary file [file soil-2019-24-AC4-supplement.pdf]

1 **Variations in soil chemical and physical properties explain**  
2 **basin-wide ~~variations in~~ Amazon forest soil carbon**  
3 **densitiesconcentrations**

4

5 Carlos Alberto Quesada<sup>1,\*</sup>, Claudia Paz<sup>1,2</sup>, Erick Oblitas Mendoza<sup>1</sup>, Oliver Phillips<sup>3</sup>,  
6 Gustavo Saiz<sup>4,5</sup> and Jon Lloyd<sup>4,6,7</sup>

7

8 <sup>1</sup>Instituto Nacional de Pesquisas da Amazônia, Manaus, Cx. Postal 2223 – CEP 69080-971, Brazil

9 <sup>2</sup>Universidade Estadual Paulista, Departamento de Ecologia, CEP 15506-900, Rio Claro, São Paulo.

10 <sup>3</sup>School of Geography, University of Leeds, LS2 9JT, UK

11 <sup>4</sup>Department of Life Sciences, Imperial College London, Silwood Park Campus, Buckhurst Road, Ascot,  
12 Berkshire SL5 7PY, UK

13 <sup>5</sup>Department of Environmental Chemistry, Faculty of Sciences, Universidad Católica de la Santísima  
14 Concepción, Concepción, Chile

15 <sup>6</sup>School of Tropical and Marine Sciences and Centre for Terrestrial Environmental and Sustainability  
16 Sciences, James Cook University, Cairns, 4870, Queensland, Australia

17 <sup>7</sup>Universidade de São Paulo, Faculdade de Filosofia Ciências e Letras de Ribeirão Preto, Av Bandeirantes,  
18 3900 , CEP 14040-901, Bairro Monte Alegre , Ribeirão Preto, SP, Brazil

19

20 \*Correspondence to: Beto Quesada (quesada.beto@gmail.com)

21

22

23 **Abstract.**

24 We investigate the edaphic, mineralogical and climatic controls of soil organic carbon (SOC) concentration  
25 utilising data from 147 ~~pristine-primary~~ forest soils (~~0-30 cm depth~~) sampled in eight different countries  
26 across the Amazon Basin. Sampling across 14 different World Reference Base soil groups our data suggest  
27 that stabilisation mechanism varies with pedogenetic level. Specifically, although SOC concentrations in  
28 Ferralsols and Acrisols were best explained by simple variations in clay content – this presumably being due  
29 to their relatively uniform kaolinitic mineralogy – this was not the case for less weathered soils such as  
30 Alisols, Cambisols and Plinthosols for which interactions between Al species, soil pH and litter quality ~~are~~  
31 ~~argued seem~~ to be much more important. ~~–SOC fractionation studies further showed that, a~~ Although for more  
32 strongly weathered soils the majority of SOC is located within the aggregate fraction, for the less weathered  
33 soils most of the SOC is located within the silt and clay fractions. It thus seems that for highly weathered  
34 soils SOC storage is mostly influenced by surface area variations arising from clay content, with physical  
35 protection inside aggregates rendering an additional level of protection against decomposition. On the other  
36 hand, most of SOC in less weathered soils ~~are~~ associated with the precipitation of aluminium-carbon  
37 complexes within the fine soil fraction, ~~and~~ with this mechanism enhanced by the presence of high levels of  
38 aromatic, carboxyl-rich organic matter compounds. Also examined as part of this study were a relatively  
39 small number of arenic soils (*viz.* Arenosols and Podzols) for which there was a small but significant  
40 influence of clay and silt content variations on SOM storage and with fractionation studies showing that  
41 particulate organic matter may accounting for up to 0.60 of arenic soil SOC. In contrast to what were in all  
42 cases strong influences of soil and/or litter quality properties, after accounting for these effects neither wood  
43 productivity, above ground biomass nor precipitation/temperature variations were found to exert any  
44 significant influence on SOC stocks ~~at all.~~ ~~–~~ These results have important implications for our understanding  
45 of how Amazon forest soils are likely to respond to ongoing and future climate changes.

46

47

48 **1 Introduction**

49 ~~Global estimates for carbon stocks in the top 1 m of soil converge around 1500 Pg (Hiederer and Köchy,~~  
50 ~~2011), which is nearly three times that of above-ground biomass estimates, and about twice the C content of~~  
51 ~~the atmosphere (Batjes, 1996, 2014; Eswaran et al., 1993; Post et al., 1982). Soil depths beyond 1 m generally~~  
52 ~~also contain carbon and therefore increase such soil carbon stock estimates substantially. For example,~~  
53 ~~Jackson et al., (2017) estimate a total carbon stock of 2770 Pg in soils up to 3.0 m deep globally; this being~~  
54 ~~nearly twice the 1.0 m depth estimates. Likewise, current estimates for the Amazon Basin forest region are~~  
55 ~~36.1 and 66.9 Pg of carbon for the top 0.3 and 1 m respectively (Batjes and Dijkshoorn, 1999), and with deep~~  
56 ~~soil layers in the Eastern Amazon soils (from 1 to 8 m deep) being known to hold as much carbon as is~~  
57 ~~contained in the top soil (Trumbore and Barbosa De Camargo, 2009). This makes the Amazon Basin forest~~  
58 ~~soil carbon stocks of similar magnitude or even higher than the aboveground biomass for the forests~~  
59 ~~themselves; the latter generally taken to total about 90 Pg C (Malhi et al., 2006; Mitchard et al., 2014).~~

60 The soil organic carbon pool (SOC) is a function of the amount and quality of organic material  
61 entering the soil and its subsequent rate of mineralization, which can be controlled by the various stabilization  
62 processes that protect SOC from decomposition (Bruun et al., 2010). For example, organic carbon may be  
63 stabilized in mineral soils through interactions with oxides and clay minerals (Kahle et al., 2004; Kaiser and  
64 Guggenberger, 2003; Mikutta et al., 2007; Saidy et al., 2012; Saiz et al., 2012; Wiseman and Püttmann,  
65 2006), with SOC physically entrapped in soil aggregates (Baldoack and Skjemstad, 2000) and/or stabilized by  
66 intermolecular interactions between SOC and the surface of clays and Fe and Al hydroxides (Oades, 1989).  
67 Thus, chemical adsorption on mineral specific surface area (SSA) has an important role on C stabilization  
68 (Kahle et al., 2003; Saggar et al., 1996, 1999; Saidy et al., 2012).

69 Specific surface area is itself dependent on clay mineralogy, with low activity clays (LAC) being  
70 1:1 alumino-silicates such as kaolinite (hereafter simply referred to as 1:1 clays) having low SSA and low  
71 cation exchange capacity ( $I_E$ ). This contrasts with high activity clays (HAC) which are 2:1 alumino-silicates  
72 such as smectites and illites (hereafter simply referred to as 2:1 clays) having a much larger  $I_E$  and SSA  
73 (Basile-Doelsch et al., 2005; Lützow et al., 2006). Hydrous Fe and Al oxides also provide reactive surface  
74 areas for organic matter binding, and with the content of Fe and Al oxides in soils often having been reported  
75 as strongly correlated to C content (Eusterhues et al., 2005; Kleber et al., 2005; Saidy et al., 2012; Wiseman  
76 and Püttmann, 2006). Hydrous iron and Al hydrous oxides nevertheless show different surface properties to  
77 those of clays. Specifically, whilst surface charges of clays are predominantly negative in the tropics  
78 (Sanchez, 1976), hydrous oxides generally have positive charges and associated anion exchange capacities,  
79 which can further substantially vary in extent in different oxide types and levels of crystallinity (Cornell and  
80 Schwertmann, 1996). Thus, the SSA of clay and oxide mixtures, their chemical nature, and the types of  
81 charge predominant in organic matter all may play an important role in the C stabilization process (Saidy et  
82 al., 2012).

83 For acidic soils, SOC stabilization by Fe and Al oxides is likely to be dominated by ligand exchange  
84 (a pH dependent process) involving carboxyl groups of SOC and simple OH groups on the surface of the  
85 oxides (Kaiser and Guggenberger, 2003; Lützow et al., 2006; Wagai and Mayer, 2007): a similar sorption  
86 mechanism to that occurring on the edges of 1:1 clay minerals such as kaolinite (Oades, 1989). Iron and Al  
87 oxides can also increase the stabilization of SOC through interactions with clay minerals via a promotion of  
88 the formation of aggregates which then serve ~~help~~ to preserve SOC (Kitagawa, 1983; Wagai and Mayer,  
89 2007), also forming bridges between ~~negative charges in~~ kaolinite and ~~positive~~ charges in organic matter  
90 which are mainly conferred by cationic amino (R-NH<sub>2</sub>) and sulfhydryl (R-SH) groups (Wiseman and  
91 Püttmann, 2006). Other factors such as the pH of soil and the organic matter loading present in the system  
92 also influence C stabilization by mineral surfaces (Saidy et al., 2012).

93 Hydrous oxides themselves also vary in their capacity to stabilize C, with amorphous Fe and Al  
94 oxides having comparatively higher capacity to stabilize C than more crystalline oxides (Kleber et al., 2005;  
95 Mikutta et al., 2005). For example, on a mass basis, the C sorption capacity of ferrihydrite is 2.5 times higher  
96 than that of goethite (Kaiser et al., 2007), while amorphous Al oxides have a greater sorption capacity than  
97 ferrihydrite (Kaiser and Zech, 2000). Despite these complexities, because many heavily weathered soils  
98 consist primarily of kaolinite (Sanchez, 1976) it is common to find strong relationships between [SOC] and  
99 soil clay fraction when only soils dominated by 1:1 clays are considered— (Burke et al., 1989; Dick et al.,  
100 2005; Feller and Beare, 1997; Telles et al., 2003).

101 A second process that may also protect organic matter against microbial decay and which should be  
102 much more relevant to 2:1 clays soils is the co-precipitation of dissolved organic matter (DOM) with Fe and  
103 Al (Baldock and Skjemstad, 2000; Boudot et al., 1989; Nierop et al., 2002; Scheel et al., 2007). DOM can be  
104 precipitated in the presence of Al, Fe and their hydroxides, with an efficiency of up to 90% of all DOM  
105 present in the solution of some acidic forest soils (Nierop et al., 2002). The extent to which DOM precipitates  
106 is largely influenced by soil pH, with higher pH values leading to an increase in precipitation (Nierop et al.,  
107 2002). This is because pH affects both the solubility of DOM (which decreases at low pH) and the speciation  
108 of Al. At higher pH levels (>4.2) the formation of hydroxide species such as Al(OH)<sup>3</sup> and tridecameric Al  
109 (Al<sub>13</sub>) controls the solubility of Al, but with Al<sup>+3</sup> predominating at lower pH. Moreover, the chemical nature  
110 of the carbon inputs into a soil may also potentially influence the nature and extent of any DOM precipitation  
111 reactions, with high molecular weight derived from lignin and tannins (e.g. aromatic compounds) with a large  
112 number of functional groups likely to be preferentially precipitated from DOM (Scheel et al., 2007, 2008).

113 The retention of such precipitated DOM in the soil can contribute substantially to total soil C pools  
114 and is considered one of the most important processes of SOC stabilization (Kalbitz and Kaiser, 2008).  
115 Indeed, mineralization rates of such metal-DOM precipitates have been reported to be 28 times lower than  
116 that of original DOM, and with the resistance of precipitates against microbial decay increasing with aromatic  
117 C content and large C:N ratios: This then resulting in a relatively stable pool that accumulates in the soil  
118 (Scheel et al. 2007). Exchangeable Al concentrations are often very high for Amazon Basin forest soils

119 (Quesada et al., 2011), and with Al/OM co-precipitations particularly important in such developing soils  
120 (Kleber et al., 2015), stabilization of DOM by precipitation with Al is likely to be of considerable importance  
121 ~~(and considerably more important than Fe-associated co-precipitations)~~, especially in the western area of the  
122 Amazon Basin where actively evolving soils dominate (Quesada et al. 2010).

123         Given the range of potential mechanisms discussed above, no single ~~edaphic factor~~ soil property  
124 should be considered ~~the~~ to likely have overriding control of SOC concentrations for Amazon Basin forest  
125 soils. And indeed, although there is a current perception that clay content alone exerts strong influence over  
126 SOC concentration of Amazon forest soils—(Dick et al., 2005; Telles et al., 2003), all of this work has been  
127 done with highly weathered soils and with SOC from soil characterized by 2:1 mineralogical assemblages  
128 not showing any sort of simple clay content dependency—(Quesada and Lloyd, 2016). This suggests that for  
129 such soils – as has already been shown to be the case for other regions of the world with similar pedogenetic  
130 levels (Bruun et al., 2010; Percival et al., 2000) – that variations in clay quality, oxide content and metal-  
131 DOM interactions are likely to be just as, if not more, important in—\_influencing the extent of SOC  
132 stabilization.

133         With the forest soils of the Amazon Basin varying substantially in their chemical and physical  
134 properties (Quesada et al., 2010, 2011), it is important to consider how the different soils of the Basin may  
135 differ in the mechanisms by which they stabilize and store SOC. Specifically, we hypothesized that soil  
136 groups with contrasting pedogenetic development should differ in their predominant mechanism of SOC  
137 stabilization, and that soils which share more similar ~~weathering levels and/or~~ chemical and mineralogical  
138 characteristics should also share similar mechanism of SOC stabilization. Specifically, we rationalized that  
139 strongly weathered soils dominated by 1:1 clays should have their C pools influenced primarily by clay  
140 content. On the other hand, given that Al is the main product of weathering in the less weathered soils of  
141 western Amazonia (Quesada et al. 2011), and with clay contents already shown to not explain well their SOC  
142 densities (Quesada and Lloyd, 2016), we hypothesized that Al / organic matter interactions were likely to be  
143 the main stabilization mechanism for such soils.

144         Finally, soil organic matter (SOM) is a complex mixture of carbon compounds and different soil  
145 minerals. SOM consists of various functional pools, which are stabilized by different mechanisms, each  
146 associated to a given turnover rate. Aiming to simplify this complexity, several soil organic matter  
147 partitioning methods have been developed to separate SOM in different operationally defined pools or  
148 fractions with contrasting chemical and physical characteristics (Denef et al, 2010).—\_Such fractionation  
149 methods ~~may~~ provide additional support for understanding soil carbon stabilization mechanisms, as well as  
150 provide useful constraints for models of soil carbon dynamics (Trumbore and Zheng, 1996; Zimmermann et  
151 al., 2007).

152 ~~Therefore, we h~~ Here we explore the climatic, edaphic and mineralogical conditioning of soil carbon pools  
153 across the diverse forest soils of the Amazon Basin focusing on three major questions:

- 154 1) What are the major edaphic and climatic factors explaining observed variations in soil organic C  
155 across the Basin?;
- 156 2) Are the likely contrasting stabilization mechanism patterns hypothesized to operate also  
157 ~~associated with~~ consistently related to different SOC physicochemical fraction distributions; and
- 158 3) How should the contrasting SOC retention mechanisms identified above influence our  
159 understanding of the likely responses of the Amazon Basin forests to future changes in climate?

160

## 161 2 Materials and Methods

### 162 2.1 Study sites and sampling

163 Soils of 147 1-ha primary forest plots, representing 14 soil orders, ~~had~~ been sampled across the Amazon  
164 Basin as part of this study (Table 1). These include forests in Brazil, Venezuela, Guyana, French Guyana,  
165 Ecuador, Colombia, Peru and Bolivia (Fig. 1).

166 Details of soil sampling protocol, laboratory analysis and soil classification can be found in Quesada  
167 et al. (2010, 2011) ~~which described a subset of the soils detailed here, and are thus only briefly described~~  
168 here. For each site at least five soil cores were ~~usually~~ taken across the 1 ha plot to the depth of 2.0 m, with  
169 an additional 2.0 m soil pit also sampled in each plot. Within each soil core, samples were collected over the  
170 following standardized depths: 0-0.05, 0.05-0.10, 0.10-0.20, 0.20-0.30, 0.30-0.50, 0.50-1.00, 1.00-1.50 and  
171 1.50-2.00 m using an undisturbed soil sampler (Eijkelpamp Agrisearch Equipment BV, Giesbeek, The  
172 Netherlands) and/or being collected from the pit walls at the same depths. All samples were air dried as soon  
173 as possible with roots, detritus, small rocks and particles over 2 mm then removed in the laboratory. Samples,  
174 sieved at 2 mm, were used in the laboratory for analysis. Throughout this paper only results for surface soils  
175 (0 – 0.30 m) are reported, which is the layer that hold the bulk of soil C in tropical forest systems (Batjes  
176 and Dijkshoorn, 1999).

177

### 178 2.2 Soil Classification

179 Soils were classified up to their Reference Soil Group (RSG) which represents the great order level in the  
180 World Reference Base for Soil Resources (IUSS (International Union of Soil Science) Working Group WRB,  
181 2014). ~~The Our~~ classification ~~performed was were~~ based on the requisite field and laboratory observations  
182 taken following the standard approach from WRB Guidelines for Soil Descriptions (Jahn et al., 2006).

183

### 184 2.3 Laboratory analysis

185 Soil samples were analysed at different institutions depending on sampling location: Max-Planck Institute  
186 fuer Biogeochemie (MPI), Jena, Germany; Instituto Venezuelano de Investigaciones Cientificas (IVIC),  
187 Caracas, Venezuela; or Instituto Nacional de Pesquisas da Amazonia (INPA), Manaus, Brazil. All  
188 laboratories were linked through inter-calibration exercises and strictly adhered to the same methodologies  
189 and sample standards. For the Venezuelan soils, only cation exchange capacity was measured at IVIC, with  
190 all remaining analysis being determined at MPI and INPA. Soil total reserve bases were analyzed in INPA  
191 and Leeds laboratories (University of Leeds, School of Geography). For samples collected after 2008 (i.e.  
192 not included in Quesada et al. 2010) all analyses were performed in INPA.

193

### 194 2.3.1 Chemical analysis

195 Soil pH was determined in H<sub>2</sub>O as 1:2.5. Exchangeable cations were determined at soil pH using the silver  
196 thiourea method ( Ag-TU, Pleyzier and Juo, 1980), with the analysis of filtered extracts then done by AAS  
197 at INPA and IVIC or by ICP-OES in MPI. Each sample run was checked and standardized with extracts from  
198 the Montana SRM 2710 soil standard reference (National Institute of Standards of Technology, Gaithersburg,  
199 MD, USA). Effective cation exchange capacity ( $I_E$ ) was calculated as the sum of  $[Ca]_E + [Mg]_E + [K]_E +$   
200  $[Na]_E + [Al]_E$ , where  $[X]_E$  represents the exchangeable concentration of each element in mmol<sub>c</sub> kg<sup>-1</sup> soil.  
201 Total phosphorus was determined by acid digestion at 360 °C using concentrated sulphuric acid followed by  
202 H<sub>2</sub>O<sub>2</sub> as described in Tiessen and Moir, (1993). In the same acid digestion extract, total concentration for Ca,  
203 Mg, K and Na was determined and the weathering index Total Reserve Bases,  $\Sigma_{RB}$ , calculated. This index is  
204 based on total cation concentration in the soil and is considered to give a chemical estimation of weatherable  
205 minerals (Delvaux et al., 1989; Quesada et al., 2010), with  $\Sigma_{RB}$  equal to  $[Ca]_T + [Mg]_T + [K]_T + [Na]_T$ , where  
206  $[X]_T$  represents the total concentration of each element in mmol<sub>c</sub> kg<sup>-1</sup> soil.

207 Leaf litter lignin estimates were available for 72 of the 147 sites, having been obtained using the acid  
208 detergent fiber method (Van Soest, 1963) as part of the studies of Quesada (2008) and Paz (2011).

209

### 210 2.4 Determination of soil organic C and its fractions

211 Concentrations of soil total organic carbon (SOC) and N were determined in an automated elemental analyzer  
212 (Nelson and Sommers, 1996; Pella, 1990). All samples were free of carbonates as confirmed by their acidic  
213 nature (Table 1). The partitioning of SOC in its different fractions was also performed for a subset of sites (n  
214 = 30) previously selected by Paz (2011) to account to the large variation in weathering, climate and chemical  
215 properties of soils occurring across forest sites in the Amazon Basin. as following Zimmermann et al., (2007).  
216 The fractionation was done in compound samples by depth (0-5, 5-10, 10-20 and 20-30 cm) to better represent  
217 the soil conditions in the 1 ha sampling plot. The fractionation scheme followed Zimmermann et al., (2007).  
218 is fractionation scheme which yields five different fractions viz. labile C associated to the clay and silt (C+S),

219 resistant C associated to clay and silt ( $R_{C+S}$ ), C associated to sand and stable aggregates (S+A), particulate  
220 organic matter (POM) and the dissolved organic C (DOC) component. Samples were dispersed using a  
221 calibrated ultrasonic probe-type operating with an output-energy of 22 J ml<sup>-1</sup>. They were subsequently wet  
222 sieved to separate <63 μm particles (C+S) from >63 μm soil particles (POM ~~+~~and S+A). The entire <63 μm  
223 solution was then centrifuged for 4 min at 1,200 rpm. The C+S obtained after centrifugation was oven dried  
224 at 40 °C for 48 hours and subsequently weighed. The  $R_{SOC}$  was obtained by incubating 1 g of C+S with 150  
225 ml of sodium hypochlorite 6% (adjusted to pH 8). After this reaction, the remaining material was washed  
226 with distilled water and oven dried at 40 °C for 48 hours. The labile C+S fraction was determined as the  
227 difference of total C associated to clay and silt and the  $R_{C+S}$ . The DOC sample was obtained by vacuum  
228 filtering an 50 ml aliquot of the total water volume used in the wet sieving (after centrifugation) through a  
229 membrane filter of 0.45 μm and had C determined by TOC analyser. S+A and POM were separated following  
230 the procedures described in Wurster et al. (2010) and Saiz et al. (2015). In short, 25 ml of sodium  
231 polytungstate solution (1.8 g/cm<sup>3</sup>, Sometu- Europe™, Berlin, Germany) was added to the >63 μm dried  
232 samples placed in 50 ml centrifuge tubes. Samples were then centrifuged for 15 min at 1,800 rpm and left to  
233 rest overnight. After this time, samples were left in the freezer for approximately 3 hours, after which POM  
234 and S+A was separated by washing the frozen supernatant with distilled water. Both fractions were washed  
235 with distilled water to remove any residue of polytungstate solution then dried at 40 °C for 48 h. All fractions  
236 were analyzed in the same way as SOC.

237 Given that some tropical soils have aggregates that are very strong and resistant to disruption by sonication,  
238 the >63 μm fraction often contains clay aggregates and therefore S+A represents the entire coarse fraction.  
239 ~~All fractions were analyzed in the same way as SOC. The recovery of C after fractionation averaged 97.7%.~~  
240 ~~Leaf litter lignin estimates were available for 72 of the 147 sites, having been obtained using the acid~~  
241 ~~detergent fiber method (Van Soest, 1963) as part of the studies of Quesada (2008) and Paz (2011).~~

242

## 243 2.5 Selective mineral dissolution

244 Soil samples were extracted for Fe and Al using established standard techniques as described in detail in Van  
245 Reeuwijk, (2002). In short, replicate samples were shaken for 16h using Dithionite-Citrate and Na-  
246 Pyrophosphate solution. The extraction with ammonium oxalate – oxalic acid solution at pH 3 was performed  
247 in the dark, shaking for 4 hours. All extracts were determined for Fe and Al concentrations in AAS. These  
248 methods provide useful quantitative estimates of soil oxide composition (Parfitt and Childs, 1988). The  
249 dithionite-citrate solution dissolves all iron oxides, such as goethite, gibbsite, ferrihydrite, halloysite,  
250 allophane, but with hematite and goethite only partially dissolved. Although this mineral dissolution method  
251 has a broad capacity to estimate Fe and Al in such minerals, it does not differentiate its various crystalline  
252 forms or between short-range (amorphous) minerals and crystalline structures. The ammonium oxalate –  
253 oxalic acid solution on the other hand, specifically dissolves short-range order minerals such as allophane,  
254 imogolite, ferrihydrite, Al-humus complexes, lepidocrocite, Al-vermiculite and Al hydroxy interlayer



255 minerals. Therefore, the difference between the two methods is often used to estimate the amount of  
256 crystalline minerals in the soil *viz.* ( $Fe_d - Fe_o$ ), while negative values indicate the predominance of short-range  
257 minerals. Further interpretation of selective dissolution data according to Parfitt and Childs (1988) is shown  
258 in Table 2.

259

## 260 **2.6 Soil physical properties**

261 Soil particle size distribution was determined using the pipette method (Gee and Bauder, 1986) and are  
262 reported here as a fraction (ranging from 0 to 1). Soil bulk densities were determined using samples collected  
263 inside the soil pits at the same depths of other samples using standard container-rings of known volume  
264 (Eijkelkamp Agrisearch Equipment BV, Giesbeek, The Netherlands). These were subsequently oven dried  
265 at 105 °C until constant weight.

266

## 267 **2.7 Mineralogy**

268 Bulk sSoil mineralogical characterization (less than 2 mm) was attained through X-ray diffractometry (XRD)  
269 using a PW1050 unit (Philips Analytical, Netherlands) attached to an X-ray generator DG2  
270 (Hiltonbrooks Ltd, Crewe, UK). XRD analyses require sample particle size to be very fine in order to  
271 obtain adequate statistical representation of the components and their various diffracting crystal planes, as  
272 well as to avoid diffraction-related artifacts (Bish and Reynolds, 1989). Therefore, samples were ground with  
273 a mortar and pestle using acetone to avoid sample degradation from heat. Powdered samples were then  
274 mounted in holders by a back filled method with the aid of a micro-rugose surface to minimize preferred  
275 orientation of the phases present. Samples were continuously scanned from 3° to 70° (2 $\theta$ ) Ni-filtered  
276 CuK $\alpha$  radiation ( $\lambda=1.54185\text{\AA}$ ) working at 40 kV and 40 mA. The scanning parameters were 0.020° step size  
277 and 1.0 sec. step time. Interpretation and semi-quantitative analysis of the scans were achieved using the  
278 Rietveld refinement method built-in within the Siroquant software (SIROQUANT; Sietronics Pty Ltd,  
279 Canberra, Australia). All samples were analyzed at the Facility for Earth and Environmental Analysis at  
280 the University of St. Andrews, Scotland, UK.

281

## 282 **2.8 Climatic and terrain elevation data**

283 Mean annual temperature ( $T_A$ ) and precipitation ( $P_A$ ) data come from BioClim ([www.worldclim.org](http://www.worldclim.org)) and  
284 site elevation ( $E_V$ ) estimates obtained from the Shuttle Radar Topography Mission database (SRTM  
285 database).

286

## 287 **2.9 Statistical analysis**

288 All analyses were carried out using the R statistical platform (R Development Core Team, 2016). In the  
289 exploratory data phase, the non-parametric Kendall  $\tau$  was used to quantify the strength of bivariate  
290 associations with the aid of the correlation function available within the agricolae package (De Mendiburu,  
291 2017). Multivariate Ordinary Least Squares Regression (OLS) were then performed relating SOC to other  
292 soil properties with candidate variables chosen with reference to the Kendall rank correlations matrices, after  
293 which there was an exhaustive exploration of regression models taking into account the *a priori* hypothesis  
294 outlined in the Introduction. As a check to ensure that we had not overlooked any of the measured variables  
295 as important potential determinants of [C] regression models, we also then checked for the minimum Akaike  
296 Information Criterion (AIC) regression models using the dredge function available within MuMIn (Bartoń,  
297 2013), and used Variance Inflation Factor (VIF) to account to possible collinearity in AIC selected models.  
298 Principal coordinates of soil mineralogical compositions were undertaken using the princomp function after  
299 first transforming the data using the acomp function available within the compositions package (van den  
300 Boogaart and Tolosana-Delgado, 2008). Kruskal-Wallis multiple comparison tests (Siegel and Castellan Jr.,  
301 1998) were undertaken using the kruskalmc command available within the pgirmess package (Giraudoux,  
302 2013).

### 303 3 Results

#### 304 3.1 Clustering of soils types

305 ~~The distribution of the sampled sites across the Amazon Basin is shown in Figure 1~~ shows the distribution of  
306 ~~the sampled sites across the Amazon Basin~~, with the soils sampled divided *a priori* into three “clusters” based  
307 ~~on a previous analysis of a subset of sites presented here (Fyllas et al., 2009; Quesada et al., 2010). This has~~  
308 ~~been done~~ according to their World Resource Base Reference Soil Group (RSG) classification (WRB, 2014):  
309 (1) ~~viz. with one group being~~ the typically more strongly weathered Acrisol and Ferralsol soil types dominated  
310 by low activity clays (LAC); (2) ~~the second being~~ other less weathered soils types (here encompassing the  
311 Alisol, Cambisol Fluvisol, Gleysol, Leptosol, Lixisol, Luvisol, Plinthosol, Regosol and Umbrisol soil  
312 groups); typically dominated by high activity clays (HAC); (3) ~~and with a third group viz.~~ exceptionally sandy  
313 soils (Arenosols and Podzols) ~~which we here refer to as, the so-called “Arenic” soil types also being~~  
314 ~~differentiated~~. From Fig. 1 the majority of the LAC soils sampled come from the eastern area of the basin  
315 and with the majority of the HAC soils found closer to the Andes Cordillera. Arenic soils are less abundant  
316 than either LAC or HAC soils, and were sampled in both the eastern and western portions of the basin.

317 The contrasting chemistry of the three soil groups is shown in Fig. 2, where soil effective cation  
318 exchange capacity,  $I_E$ , is plotted as a function of soil clay fraction,  $\Phi_{\text{clay}}$  (0 to 0.3 m depth) with different  
319 symbols for each RSG and with the contrasting  $I_E$  vs.  $\Phi_{\text{clay}}$  domains indicated by different background  
320 colours. This shows a minimal overlap between the Arenic and LAC/HAC soil types and with some of the  
321 former having relatively high  $I_E$  despite their very low clay content. There is some overlap between the LAC

322 and HAC soil clusters at intermediate  $I_E$  and/or  $\Phi_{\text{clay}}$ , though with it also being clear that none of the sampled  
323 LAC soils were characterised by a high  $I_E$  and that none of the HAC soils had a very high or very low clay  
324 content.

325

### 326 **3.2 Mineralogical analysis**

327 Distinctions between the LAC and HAC clusters are further illustrated in Fig. 3, where for a subset of the  
328 main dataset, mineralogical analysis of the bulk soil had been undertaken using X-ray Diffraction  
329 Spectroscopy (XRD) and for which the results of a Principal Components Analysis (PCA) ordination are  
330 shown in Fig. 3a. Here it can be seen that the first PCA axis (PCA1) serves to primarily differentiate the soils  
331 according to their clay activity with the 1:1 clay minerals gibbsite, goethite and kaolinite all with large  
332 negative weightings on the PCA1 axis and with the 2:1 potassium feldspar, plagioclase, smectite-illite and  
333 chlorite minerals all with positive weightings. Accordingly (although mineralogy is not used in the RSG  
334 (reference soil groups) classification system), almost all sites within our RSG based LAC cluster are located  
335 with negative scores along the PCA1 axis and with almost all HAC soils with positive values. All four Arenic  
336 soils [analysed subject to XRD](#) had high PCA scores.

337 The contrast between the three soil groups is further shown in Fig. 3b where, shown as a  
338 compositional plot, the contrasting relationships between the 1:1 and 2:1 minerals are considered along with  
339 variations in quartz content. This diagram emphasises the almost total lack of 2:1 minerals found with the  
340 LAC soil cluster, with these soils essentially being of a mixture of 1:1 minerals (primarily kaolinite: see Table  
341 1) and quartz in varying proportions. On the other hand, the HAC soils are all characterised by a high quartz  
342 content and with less than 20% 1:1 minerals present. [Also ; although](#) of note, two Cambisols, one Regosol  
343 and one Gleysol had 2:1 minerals constituting less than 1% in their fine earth fraction. Not unexpectedly,  
344 having a quartz content of > 97%, all four Arenic soils are found clustered in the bottom right-hand corner  
345 of the compositional triangle.

346

### 347 **3.3 Univariate and bivariate comparisons**

348 Using data averaged over the upper 0.3 m of the sampled soil profiles, Figure 4 shows as boxplots the  
349 contrasts between our three *a priori* soil groups in terms of their carbon density [C]; total reserve bases  $\Sigma_{\text{RB}}$ ,  
350 effective cation exchange capacity  $I_E$ , fractional sand, silt and clay contents ( $\Phi_{\text{sand}}$ ,  $\Phi_{\text{silt}}$  and  $\Phi_{\text{clay}}$ ) and  
351 concentrations of dithionite and oxalate extractable aluminium and iron *viz.*  $[\text{Al}]_d$ ,  $[\text{Al}]_o$ ,  $[\text{Fe}]_d$  and  $[\text{Fe}]_o$   
352 ( $\circ$ Original data available in Table 1 and Appendix Table A1). This shows that, although there was no  
353 significant difference between the three clusters in [C] (Fig. 4a; Kruskal-Wallis test;  $p > 0.05$ ), there were  
354 significant differences in the underlying chemistry at  $p < 0.05$  not only between the Arenic soil cluster and  
355 both the LAC and HAC clusters for  $\Sigma_{\text{RB}}$  (Fig. 4b)  $I_E$ , (Fig. 4c),  $[\text{Al}]_d$  (Fig. 4d),  $[\text{Al}]_o$  (Fig. 4e),  $[\text{Fe}]_d$  (Fig. 4f)

356 and  $[\text{Fe}]_o$  (Fig 4g) but also with HAC soils having higher  $\Sigma_{\text{RB}}$ ,  $I_E$ ,  $[\text{Fe}]_d$  and  $[\text{Fe}]_o$  than the soils in the LAC  
357 cluster ( $p < 0.05$ ). For pH, the situation was more complicated, but with the HAC soils having higher values  
358 than the LAC soils ( $p < 0.05$ ) but, with no difference between the Arenic soils and either the LAC or HAC  
359 soils. Despite there being many differences in ~~soil properties significant location~~ at  $p < 0.05$  or better as  
360 ~~detected through the~~ (non-parametric Kruskal-Wallis test), ~~for all seven soil chemical properties presented in~~  
361 ~~Fig. 4~~ considerable, overlap ~~between the~~ existed in LAC and HAC soils ~~was in most cases considerable. for~~  
362 ~~all seven soil chemical properties presented in Fig. 4.~~

363 In terms of soil texture, as would reasonably be expected,  $\Phi_{\text{sand}}$  was significantly higher at  $p < 0.05$   
364 for the Arenic versus LAC and/or HAC clusters (Fig. 4i). ~~As would be expected, we also observed~~ ~~which~~  
365 ~~was also reflected in~~ significantly lower  $\Phi_{\text{clay}}$  for the Arenic soils ( $p > 0.05$  Fig. 4j). On the other hand, there  
366 was no difference between  $\Phi_{\text{silt}}$  for the Arenic vs. LAC soils, both of which, in turn, had a significantly lower  
367  $\Phi_{\text{silt}}$  than the soils of the HAC cluster ( $p < 0.05$ ; Fig. 4k). As is also evident from Fig. 2, there was much more  
368 variation in  $\Phi_{\text{clay}}$  for the LAC soils ~~compared as opposed~~ to the HAC soils.

369 Using Kendall's  $\tau$  as a non-parametric measure of association, correlations between a wide range of  
370 soil and climate properties potentially involved in differences in soil carbon storage are shown in Table 3.  
371 ~~This, which~~ takes the form of four one-sided correlation matrices *viz.* one half-triangle for each of the Arenic,  
372 LAC and HAC clusters as well as for the (combined) dataset as a whole. Here, with  $n > 30$  for the LAC and  
373 HAC clusters we have indicated in bold all cases where  $\tau > 0.30$  for these two groupings (as well as the  
374 combined dataset) with this associating roughly with the probability of Type-II error being less than 0.05.  
375 For the Arenic soil cluster with  $n = 13$  the equivalent value is  $\tau > 0.52$  and where one or more of the four  
376 groupings has  $p > 0.05$ , this has been indicated for all four matrices using different colours to help cross-  
377 referencing across the four diagonal matrices

378 Table 3 shows that, whilst there are many correlations which are significant at  $p = 0.05$  ~~or better, in~~  
379 ~~to be found in the dataset,~~ only in a few cases ~~were s are~~ there significant correlations found for the same  
380 bivariate combinations in two or more of the three soil clusters and/or when the three clusters are considered  
381 together. For example, although there is clear association between soil texture and soil carbon density for the  
382 LAC soils ( $\tau = -0.56$  and  $\tau = 0.54$  for  $\Phi_{\text{sand}}$  and  $\Phi_{\text{clay}}$  respectively), this is not the case for the HAC soils ( $\tau =$   
383  $0.06$  and  $\tau = 0.19$ ), and with the association also being much less clear for the Arenic grouping ( $\tau = -0.17$  and  
384  $\tau = -0.24$ ). Consequently, when all three soil clusters are considered together we find  $\tau$  of only  $-0.21$  and  $0.31$   
385 for  $\Phi_{\text{sand}}$  and  $\Phi_{\text{clay}}$ . That is to say, when all soils are considered together there is much weaker association  
386 between soil carbon ~~density-concentration~~ and soil texture than when LAC soils are considered on their own.  
387 This is also the case for the relationship between  $[\text{C}]$  and soil bulk density,  $D_b$ , for which we find  $\tau = -0.47$   
388 for LAC soils but markedly lower values for the HAC and Arenic soils ( $\tau = -0.29$  and  $\tau = -0.17$  respectively),  
389 as well as for the combined dataset ( $\tau = -0.33$ ).

390 In a similar vein, although a high ~~Fe-cation exchange capacity~~ ( $I_E$ ) is clearly associated with a high  
391  $[\text{C}]$  for LAC soils ( $\tau = 0.37$ ) and perhaps the Arenic soils as well ( $\tau = 0.43$ ), for the HAC soils we find a  $\tau$  of

392 only -0.08 for the [C] vs.  $I_E$  association. Not surprisingly then, for ~~and for~~ the dataset as a whole  $\tau$  equals  
393 only 0.13 for the  $I_E$  vs. [C] correlation.

394 On the other hand (simple physically based bivariate ~~correlations associations~~ such as  $T_a$  vs.  $E_v$  aside)  
395 there are cases where the strength of the bivariate associations seems to be consistent across all three soil  
396 groups. For example, taking the relationship between total phosphorus, [P]<sub>t</sub>, and mean annual air temperature,  
397  $T_a$ , shows  $\tau = -0.29$ ,  $\tau = -0.32$  and  $\tau = -0.22$  for the LAC, HAC and Arenic soils respectively and with the  
398 combined dataset yielding  $\tau = -0.35$ ; ~~a value higher than any of the individual clusters when considered on~~  
399 ~~its own.~~ A second example ~~of this~~ is the relationship between dithionite extractable aluminium [Al]<sub>d</sub> and  
400  $\Phi_{\text{clay}}$  for which we find  $\tau = 0.31$  for LAC soils,  $\tau = 0.20$  for HAC soils and  $\tau = 0.36$  for Arenic soils and with  
401  $\tau = 0.35$  for the dataset as a whole. Although ~~we found, not surprisingly there are~~ many correlations between  
402 the variation oxalate/dithionite extraction metrics for Fe and Al, it was only [Al]<sub>d</sub> that, on its own, showed  
403 any marked association with [C]<sub>t</sub>, and ~~with this being here only~~ for the LAC soils ( $\tau = 0.37$ ). ~~Although~~ ~~although~~  
404 we ~~do~~ also note that  $\tau = 0.29$  for the HAC soils and  $\tau = 0.28$  for the dataset as whole.

405 Also of note are the many cases where there are reasonably high  $\tau$  found for both the LAC and HAC  
406 soils, but not for the Arenic ones: for example in the ~~associations correlations~~ between Total Reserve Bases,  
407  $\Sigma_B$ , and organic matter CN ratio for which we observe  $\tau = -0.44$  for LAC soils and  $\tau = -0.56$  for HAC soils,  
408 but with a value of only  $\tau = -0.03$  for the soils in the Arenic cluster.

### 410 3.4 Carbon/soil texture associations

411 With a high  $\tau$  observed for several [C] vs. soil texture ~~associations relationships~~ (Section 3.3), the ~~relationship~~  
412 ~~correlations~~ between soil carbon content and  $\Phi_{\text{clay}}$  ~~are~~ shown ~~in in~~ Fig. 5 with a separate panel used for each  
413 of the three soil clusters; and with each panel having different ranges for both the  $x$ - and  $y$ -ordinates. For the  
414 LAC soils (Fig 5a) strong linear relationship exists ( $r^2 = 0.5758$ ) and with there being little apparent  
415 difference between the Ferralsol and Acrisol RSGs. But when LAC OLS regression line is repeated again  
416 within the Arenic soil group [C] vs.  $\Phi_{\text{clay}}$  ~~association~~ graph of Fig 5b (for which we also note ~~that the~~  
417 ~~variability in  $\Phi_{\text{clay}}$  is only one-tenth of that for the  $x$ -axis extends only one-tenth that of~~ Fig 5a and with a  ~~$y$ -~~  
418 ~~axis [C] being 4-fold larger~~) it is clear that, not only does soil clay content exert little or any control over [C]  
419 for these sandy soils, but also that many of the Podzols have [C] well in excess of even the highest clay  
420 content LAC soils. With the LAC OLS regression line again repeated for the HAC soils in Fig. 5c it is  
421 similarly clear that many of the HAC soils have [C] appreciably higher than is expected on the basis of the  
422 highly significant LAC [C] vs.  $\Phi_{\text{clay}}$  relationship: but with no detectable [C] vs.  $\Phi_{\text{clay}}$  ~~association correlation~~  
423 when considered on their own ( $r^2 = 0.01$ ).

424 The underlying OLS regressions of Figure 5 are outlined in more detail in Table 4. ~~Here, which,~~ as  
425 well as providing a [C] vs.  $\Phi_{\text{clay}}$  OLS regression summary for the combined dataset as whole, ~~we also also~~  
426 ~~examined~~ the effects of including  $\Phi_{\text{silt}}$  in the [C] vs.  $\Phi_{\text{clay}}$  regression models: this being either as an additional

427 term or as part of a single ( $\Phi_{\text{silt}} + \Phi_{\text{clay}}$ ) predictor – the latter, of course, also being equal to  $[1 - \Phi_{\text{sand}}]$ .  
428 Comparing the equations for LAC, this analysis shows that the addition of the  $\Phi_{\text{silt}}$  term to the [C] vs.  $\Phi_{\text{clay}}$   
429 regression increases the  $r^2$  from 0.57 (Table 4a) to 0.61 (Model b) with a change in Akaike's Information  
430 Criterion ( $\Delta\text{AIC}$ ) of -3.9 and with the coefficients for both terms having very similar slopes, viz  $16.6 \pm 2.1$  g  
431 C  $\text{kg}^{-1}$  clay and  $14.4 \pm 6.2$  g C  $\text{kg}^{-1}$  silt. For these LAC soils, taking silt and clay together as the one soil texture  
432 metric (Table 4c) yields resulted in a similar  $r^2$  with an intermediate slope of  $16.2 \pm 1.8$  g C  $\text{kg}^{-1}$  (clay +  
433 silt).

434 Despite the strong relationships found for the LAC soils for both  $\Phi_{\text{clay}}$  and  $\Phi_{\text{silt}}$ , no such  
435 association correlation was evident for the HAC soils and, of the three models tested, none had a  $r^2$  greater  
436 than 0.05 (Table 4d-f). For the Arenic soils, the addition of  $\Phi_{\text{silt}}$  term to a simple [C] vs.  $\Phi_{\text{clay}}$  model led to a  
437  $\Delta\text{AIC}$  of only -1.7 (compare equations of Table 4g and h). Nevertheless, but where a summation term ( $\Phi_{\text{clay}}$   
438 +  $\Phi_{\text{silt}}$ ) was tested as a single predictor variable this resulted in a marked improvement over and above the  
439 [C] vs.  $\Phi_{\text{clay}}$  relationship with a  $\Delta\text{AIC}$  of -3.6 and  $r^2$  of 0.31 (Table 4i). Of note, Table 4i shows that the  
440 fitted slope for the Arenic soils was  $155 \pm 63$  g C  $\text{kg}^{-1}$  (clay + silt), a value nearly 10 times that found for the  
441 LAC soils (Table 4c). When all three soils groupings were considered together there was no significant  
442 relationship between [C] and  $\Phi_{\text{clay}}$ ; this being the case for either with  $\Phi_{\text{clay}}$  considered on its own, or for when  
443  $\Phi_{\text{clay}}$  considered in conjunction with  $\Phi_{\text{silt}}$ , and with all three models tested having  $r^2 \leq 0.01$  and  $p > 0.13$  (Table  
444 4j -l).

445

### 446 3.5 Soil carbon chemical and/ mineralogical associations

447 As already noted in Section 3.1, of the many strong associations correlations between the aluminium and iron  
448 oxide measured and soil carbon concentration, one of the strongest and the most consistent across the three  
449 soil groups was the [C] vs.  $\text{Al}_d$  relationship, and this relationship is shown for all three soil groupings in Fig.  
450 6 (log-log scale) with the appropriate regression coefficients shown in Table 5 (models m to o). This shows  
451 Reasonably strong relationships were to be found between [C] and  $\text{Al}_d$  for both the LAC (Fig. 6;  $r^2 = 0.27$   $p$   
452  $< 0.0001$ ) and HAC soils (Fig. 6c:  $r^2 = 0.23$   $p < 0.0001$ ), but not for the Arenic grouping (Fig. 6b;  $r^2 = 0.09$   
453  $p > 0.17$ ). Here direct comparison with the soil texture models of Table 4 according to the AIC values is  
454 confounded by slightly different datasets for the HAC soils (due to  $\text{Al}_d$  only having been determined for 77  
455 of the 83 HAC soils) and with the relationships examined here being log-log as opposed to linear. But  
456 nevertheless, the very different  $r^2$  between the two model types: with  $r^2 = 0.27$  much lower for the [C] vs.  
457  $\text{Al}_d$  relationship than for any of the [C] vs. soil texture models for the LAC soils (for which  $r^2 > 0.57$ ) and  
458 with this being the other way around for the HAC soils ( $r^2 = 0.23$  for the [C] vs.  $\text{Al}_d$  relationship but with  
459 none of the soil texture models having  $r^2 > 0.05$ ) suggests that for the HAC soils that  $\text{Al}_d$  is a much better  
460 predictor of [C] than soil texture. Withal, simple soil texture metrics were the better predictors for the LAC  
461 soils.

462 With any role of  $[Al]_d$  in the modulation of  $[C]$  also likely to be dependent on soil pH (see  
463 Introduction) we then probed potential interactions of  $[Al]_d$  and pH, at the same time evaluating the potential  
464 role of other measured mineralogical factors. ~~This was done by~~ testing a range of multivariate models and  
465 selecting on the basis of AIC: the net result of which is shown in Table 6 (model *g*). This model, which also  
466 involves both pH and  $[Fe]_o$  has a  $\Delta AIC$  of -17.7 as compared to the univariate  $[Al]_d$  model of Table 5n  
467 suggesting a drastic improvement through the addition of the two additional terms. But nevertheless, using  
468 data for 41 of the 77 HAC sites for which we had leaf litter lignin content ( $\Lambda$ ) measurements available there  
469 was a clear relationship between the model residuals of Eqn 6q (Fig. 7a) and with this relationship also being  
470 evident (though to a lesser extent) when a simpler model involving just  $[Al]_d$  and pH was applied ( $r^2 = 0.25$ ,  
471  $AIC = 85.1$ ; Fig. 7b). In both cases residuals increase with increasing  $\Lambda$  meaning that at high  $\Lambda$  the models  
472 tend to underestimate  $[C]$  and *vice versa* at low  $\Lambda$ .

473 With this lignin effect being consistent with any pH dependent  $[Al]_d$  precipitation reaction  
474 mechanism as originally postulated, we thus probed a possible role of  $\Lambda$  as a factor interacting with both pH  
475 and  $Al_d$  using the more limited dataset of 41 HAC sites for which the requisite data was available. Model  
476 comparisons are shown in Table 7. Starting first with a simple model of  $[C]$  as a function of  $[Al]_d$ ,  $[Fe]_o$  and  
477 pH (Table 7t which is the same model as Table 6q but in this case with the reduced 'leaf lignin only' dataset)  
478 ~~shows that indeed,~~ the addition of a  $\Lambda$  term ~~clearly~~ results in a marked improvement in the model fit (Table  
479 7u;  $r^2 = 0.46$ ,  $\Delta AIC = -3.50$ ). ~~Moreover, and that,~~ for this reduced dataset at least, the  $[Fe]_o$  term then becomes  
480 redundant (Table 7v;  $r^2 = 0.47$ ,  $\Delta AIC = -2.0$ ).

481 The goodness of fit of Equation 7v is shown in Figure 8 where the fitted soil carbon densities,  $[\hat{C}]$   
482 are plotted as a function of the actual values (log-log scale). This shows Equation 7v to provide a reasonable  
483 and unbiased fit across a wide range of  $[C]$  for HAC soils, though with two locations (*viz.* POR-02, a  
484 Plinthosol in the west of the basin and RIO-12, a Lixisol on the basin's northern periphery) being substantially  
485 overestimated by the model.

486 Probing the effect of litter quality on soil C storage further, we examined the relationship of  $\Lambda$  with  
487 both leaf litter and soil C/N ratios (denoted  $\Phi_{CN}^L$  and  $\Phi_{CN}^S$  respectively); this exercise being undertaken  
488 with a view to see if we could find statistically significant relationships between  $\Lambda$  and one or both of  $\Phi_{CN}^L$   
489 and  $\Phi_{CN}^S$ . ~~This was so as to to~~ allow incorporation of litter quality surrogate measures into an analysis using  
490 the full HAC soil dataset. As is shown in Figure 9, there were indeed significant log-log relationships between  
491  $\Lambda$  and both  $\Phi_{CN}^L$  and  $\Phi_{CN}^S$  for both HAC soils (but not for LAC soils and not between  $\Phi_{CN}^L$  and  $\Phi_{CN}^S$  for  
492 HAC soils), and with the HAC  $\Lambda$  ~~vs.;~~  $\Phi_{CN}^S$  giving a better fit ( $r^2 = 0.32$ ,  $p < 0.0001$ , Figure 9b).

493 ~~Considering that the correlation between [C] and C:N ratio in HAC soils is very low ( $\tau = 0.1$ , Table~~  
494 ~~3) we then~~ Take ~~ing then~~  $\Phi_{CN}^S$  as our best available surrogate for litter quality, ~~we then-and~~ tested the effect

495 of adding this variable to the original HAC model as given in Table 6q, finding that ~~this term, not only did~~  
496 ~~this term provided~~ for a substantial reduction in AIC when added to a model already including pH,  $[Al]_d$  and  
497  $[Fe]_o$ . ~~Further, but that also,~~ upon the inclusion of the  $\Phi_{CN}^S$  term that the negative  $[Fe]_o$  term became, as for  
498 the lignin models of Table 7, redundant (Table 6s).

499 The goodness of fit of the equation of Table 6s is shown in Figure 10 where the fitted soil carbon  
500 densities  $[\hat{C}]$  are plotted as a function of the actual values (log-log scale). This shows Equation 6s to provide  
501 a reasonable and unbiased fit across a wide range of  $[C]$  for HAC soils, though with the same two locations  
502 as were overestimated by the lignin model (Figure 9) similarly overestimated.

### 504 3.6 Alternative models

505 Although we have used AIC to assist with model selection in Sections 3.3, 3.4 and 3.5, ~~candidate our choice~~  
506 ~~of models had beento be tested has for all three soil types in all cases been~~ guided by the background  
507 knowledge and hypothesis as outlined in Section 1. It is therefore worth pointing out that if one takes a simple  
508 information criterion-guided model selection approach then it is possible to find models with a lower AIC  
509 than those presented in Tables 4 and 6. For example, for LAC soils there is a model involving all of  $\Phi_{sand}$ ,  
510  $\Phi_{clay}$ ,  $[Al]_d$ ,  $[Al]_o$ ,  $[Fe]_d$ ,  $[Fe]_{do}$  and  $\Phi_{CN}^S$  which provides a significantly better fit than Equation b of Table 4  
511 ( $\Delta AIC$  of -19.9). But for this model many of the terms had  $VIF > 10$  and after removal of these terms then  
512 the simpler  $[C] = \Phi_{sand} + \Phi_{clay}$  equation is only 0.2 AIC units higher.

513 Likewise, if one applies a ‘blind’ information criterion selection criterion to the HAC soils then it is  
514 possible to find a log-log model significantly better to that of Table 6se which retains the  $[Al]_d$  term but with  
515  $\log \Sigma_{RB}$  substituting pH and, moreover, with an additional  $\Phi_{clay}$  term included ( $r^2 = 0.65$ ;  $p < 0.0001$ ;  $\Delta AIC =$   
516  $-20.5$ ). Further, modifying this ‘blindly selected’ equation, by reinserting our previously rationalised pH term  
517 in preference to  $\log \Sigma_{RB}$  term (thus effectively adding a  $\Phi_{clay}$  term to the Equation of Table 6sv) results in a  
518 markedly inferior fit ( $\Delta AIC = +10.3$ ). Nevertheless, the resulting equation, viz  $[C] = pH + \log [Al]_d + \log$   
519  $(\Phi_{CN}^S) + \Phi_{clay}$ , ( $r^2 = 0.63$ ) is still a marked improvement on the equation of Table 7v ( $\Delta AIC = -10.2$ ).

520 For the smaller Arenic soils dataset ( $n = 10$ ) the lowest AIC linear model is as in Table 4h (i.e. with,  
521 combined together, clay and silt only,  $r^2 = 0.31$ ,  $p = 0.035$ ). Although we do note that there does exist a  
522 virtually uninterpretable log-log model found through the AIC minimisation procedure which involves all of  
523 pH (negative coefficient),  $\Phi_{sand}$ ,  $[Al]_d$ ,  $[Fe]_d$  and  $\Phi_{CN}^S$  (positive coefficients) with an impressive sounding  $r^2$   
524  $= 0.85$  (but due to the low degrees of freedom for which  $p$  is only  $< 0.039$ ).



### 526 3.7 Checking for model biases

527 In order to check if there were any systematic biases in the final models used (*viz.* the models as presented in  
528 Table 4b for LAC soils, Table 4i for Arenic soils and Table 6s for HAC soils) standardised model residuals  
529 were examined in relationship to the soil variables  $\Phi_{\text{sand}}$ ,  $\Phi_{\text{clay}}$ ,  $\Phi_{\text{silt}}$ ,  $[\text{Al}]_d$ ,  $[\text{Al}]_o$ ,  $[\text{Fe}]_d$ , pH and CN ratio [along](#)  
530 ~~with s-well-as-the~~ mean annual temperature  $T_A$  and mean annual precipitation  $P_A$  climate variables and two  
531 vegetation-associated characteristics available for over 100 of the study sites *viz.* the above ground wood  
532 productivity and above ground biomass. ~~This data is being~~ essentially as in Quesada et al. (2012) but in an  
533 updated and expanded form (O. L. Phillips and M. J. Sullivan, personal communication). These relationships  
534 shown in the Appendix Figure A1 which shows that there was little if any evidence of systematic model bias  
535 with the strongest association found for the standardized residuals being with  $P_A$  ( $\tau = 0.09$   $p = 0.18$ ).

536

### 537 3.8 SOC fractions and mineralogy

538 Further adding to our analysis, Table 8 shows results for soil carbon fractions for a subset of our study sites  
539 ( $n = 30$ ). The [C] range in this reduced dataset is similar to the main dataset, with LAC soils ranging from  
540 8.8 to 25.3 mg g<sup>-1</sup>, with Arenic group ranging from 4.2 to 108.6 mg g<sup>-1</sup>, and with the HAC soils ranging from  
541 5.5 to 24.8 mg g<sup>-1</sup>. It also shows very similar relationships between the relevant edaphic parameters and [C]  
542 as found for the larger dataset and described in section 3.2. Comparing the Kendall  $\tau$  from Table 8 with  
543 results from Table 3, we find very similar correlations for both LAC and for all groups combined, but with  
544 [C] in the reduced dataset having stronger correlations with clay content and  $\text{Al}_d$  in LAC soils ( $\tau = 0.64$ ;  
545  $p < 0.01$  and  $\tau = 0.61$ ;  $p < 0.01$ , respectively). The main difference between datasets occurs in HAC soils, where  
546 the reduced dataset used for fractionations shows stronger correlations between [C] and both clay content  
547 and  $I_E$  ( $\tau = 0.49$ ;  $p < 0.02$  and  $\tau = 0.72$ ;  $p < 0.001$ , respectively) than is the case in the larger dataset (Table  
548 3).

549 Soil C fractionations revealed fundamental differences between the three soil groups as shown in  
550 detail in Fig. 11. LAC soils (Fig. 11a) had ~~an-an~~ average [fraction of 0.49 \(or 49%\) of its](#) C in clay rich  
551 aggregates (~~s~~Sand and ~~a~~Aggregates fraction, S+A), with this increasing with [C] up to 0.74. This increase in  
552 S+A fraction in high [C] soils seems to occur at the expense of the labile clay and silt fraction (C+S) which  
553 represents [a fraction of 0.20](#) of soil carbon on average, but only 0.09 in the higher [C] soils. The proportion  
554 of C in POM and DOC fractions varied little across the range of soil [C], while the resistant carbon associated  
555 to clay and silt ( $R_{C+S}$ ) averaged of  $0.2 \pm 0.07$  and showed no clear pattern.

556 On the other hand, the Arenic group have most of their carbon associated to POM and S+A fractions  
557 (average proportion of 0.47 and 0.25, respectively) (Fig. 11b, Table 8), with the [proportion-fraction](#) of POM  
558 reaching 0.70 in soils with higher overall [C]. Seasonally wet sands (denoted with <sup>F</sup> following the soil type  
559 in Table 1) had the highest POM fractions, averaging 0.6 of total [C], but despite the differences in [C] related

560 to soil drainage, POM and S+A fraction were still the main stores of SOC in well drained sands (0.33 and  
561 0.3 of total [C], respectively).

562 ~~On the other hand,~~ HAC soils had consistently most of their [C] associated to the clay and silt  
563 fraction (0.43) and the resistant carbon (0.28) associated to clay and silt ( $R_{C+S}$ ). On average 0.72 of [C] was  
564 found in these two fine earth fractions (Fig. 11c). The S+A fractions only had on average 0.13 of HAC soils  
565 [C], while POM and DOC had 0.13 and 0.01 respectively. In general, the HAC fractions varied little in  
566 proportion with increasing [C].

567 Soil C fractions in the three groups also differed in the way they relate to other edaphic properties  
568 such as texture, the abundance of Fe and Al oxides, and bulk soil mineralogy (Table 8). In LAC, soil carbon  
569 associated to both C+S and  $R_{C+S}$  fractions did not show any significant correlation with Fe and Al oxides,  
570 nor with clay content, but with C+S being correlated with soil silt content (Kendall  $\tau = 0.45$   $p < 0.025$ ). On  
571 the other hand, the S+A fraction, the main pool of SOC, was significantly correlated to clay content ( $\tau = 0.55$ ;  
572  $p < 0.01$ ). S+A was also negatively correlated with our PCA axis 1 which indicates a positive relationship with  
573 the abundance of 1:1 clay minerals (see Section 3.2) as  $\chi_1$  axis 1 ( $\chi_1$  Table 8) represents to a large degree the  
574 abundance of kaolinite, Goethite and Gibbsite (Kendall  $\tau = -0.39$   $p < 0.05$ ). S+A was also negatively correlated  
575 to sand content (Kendall  $\tau = -0.52$   $p < 0.01$ ), S+A was also significantly correlated to Fe oxides (Kendall  $\tau =$   
576  $0.44$ ;  $p < 0.03$  and  $0.39$   $p < 0.05$  for  $Fe_d$  and  $Fe_{d-o}$ , respectively). The DOC fraction was significantly  
577 correlated to clay (Kendall  $\tau = 0.61$   $p < 0.01$ ),  $I_E$  (Kendall  $\tau = 0.48$   $p < 0.02$ ) and  $Al_d$  (Kendall  $\tau = 0.39$   $p < 0.05$ ).  
578 DOC was also correlated to  $\chi_1$  (Kendall  $\tau = -0.39$   $p < 0.05$ ). The POM fraction was significantly correlated to  
579  $Fe_{d-o}$  (Kendall  $\tau = 0.39$   $p < 0.05$ ).

580 The small number of Arenic soils in this analysis ( $n=5$ ) makes correlations unreliable and difficult  
581 to interpret. At  $n = 5$ , a Kendall  $\tau = 0.8$  does not differentiate critical values at  $p = 0.1$  and  $0.05$ ., and  
582 significance can only be attained for Kendall  $\tau = 1$ . Therefore, correlations in Table 8 should be taken just as  
583 a guidance for the direction of the relationship and are not considered further here.

584 HAC fractions showed totally different correlations to edaphic properties when compared to LAC  
585 soils. For example, the C+S fraction was significantly correlated to clay content ( $\tau = 0.59$   $p < 0.01$ ),  $I_E$  ( $\tau =$   
586  $0.62$   $p < 0.01$ ) and with the weathering index TRB ( $\tau = 0.64$   $p < 0.01$ ). C+S also showed a positive correlation  
587 with PCA axis 1, indicating a positive correlation with the abundance of 2:1 clays ( $\tau = 0.49$   $p < 0.02$ ).  $R_{C+S}$  in  
588 HAC soils also showed an effect of both  $Fe_d$  and  $Al_d$  (Kendall  $\tau = 0.62$   $p < 0.01$  and  $0.41$ ,  $p < 0.04$ , respectively)  
589 and  $I_E$  (Kendall  $\tau = 0.44$   $p < 0.03$ ).

590 In striking difference to LAC, S+A in HAC soils was an insignificant storage for SOC and showed  
591 no significant correlation to the concentration of any oxides, clay content or any other of the measured  
592 parameters. DOC on the other hand behaved in a more similar manner to LAC soils, also showing significant  
593 associations with  $I_E$  ( $\tau = 0.60$   $p < 0.01$ ) and clay content ( $\tau = 0.41$   $p < 0.04$ ) and an iron oxide effect ( $Fe_d$ :  $\tau =$

594 0.49;  $p < 0.02$ ). POM on the other hand was correlated to Fe<sub>o</sub> ( $\tau = 0.51$ ;  $p < 0.02$ ) and Al<sub>o</sub> ( $\tau = 0.41$ ;  $p <$   
595  $0.05$ ) and  $I_E$  ( $\tau = 0.49$ ;  $p < 0.02$ , respectively).

596

### 597 3.9 Carbon stocks versus carbon concentrations

598 Although the analysis here has focused on soil carbon concentrations, for carbon inventory purposes the  
599 actual carbon stock (i.e. carbon per unit ground area;  $C_s$ ) is usually of more interest, and with the two being  
600 related according to

$$601 \quad C_s = \int_d^0 [C]_z \cdot \rho_z \, dz$$

602 where  $[C]_z$  and  $\rho_z$  represents the carbon concentrations and bulk density of the soil at depth  $z$  below the  
603 soil surface respectively and  $d$  is the maximum sampling depth. Thus with the actual calculations done  
604 layer by layer (*viz.* 0 to 0.05 m, 0.05 to 0.10 m, 0.10 to 0.20 m and 0.20 to 0.30 m) Figure 12 shows (top  
605 panels) the relationship between  $[C]$  and  $\rho$  for the three soil groups with regressions shown were  
606 significant at  $p < 0.05$  or better. This shows a reasonably strong relationship for the LAC soils across the 0  
607 to 0.3 m depth (Fig 12a,  $\log(\rho) = 0.881 - 0.298 \times \log[C]$ ;  $r^2 = 0.43$ ;  $p < 0.001$ ) and with a similar  
608 though somewhat less convincing relationship being observed for the HAC soils (Fig 12b,  $\log(\rho) = 0.678$   
609  $- 0.219 \times \log[C]$ ;  $r^2 = 0.25$ ;  $p < 0.001$ ) but no readily discernable relationship evident for the Arenic  
610 soils (Fig. 12c,  $\log(\rho) = 0.697 - 0.233 \times \log[C]$ ;  $r^2 = 0.20$ ;  $p < 0.08$ ).

611 These negative  $[C]$  vs.  $\rho$  associations across all three soil groupings necessitate that  $C_s$  is a saturating  
612 function of  $[C]$  as is shown in the lower panels of Fig. 12 with the slopes of the log-log scaling relationships  
613 being  $0.62 \pm 0.05$  for LAC soils (Fig. 12d),  $0.71 \pm 0.05$  for the HAC soils (Fig. 12e),  $0.23 \pm 0.15$  for the  
614 Arenic soils (Fig 12f) and  $0.59 \pm 0.04$  for the dataset as a whole. This means, for example, that – on average  
615 – an increase in  $[C]$  of 50% will result in only an increase in  $C_s$  of  $(1.5^{0.59} - 1)$  or just 27%.

616 This negative covariance between  $[C]$  vs.  $\rho$  also means that within a given soil group variation in  
617  $C_s$  is typically much less than for  $[C]$ . For example, as is shown in Table 9, the 12 RSG examined show a  
618 lower coefficient of variation for  $C_s$  than is the case for  $[C]$  and with this difference being especially marked  
619 for Cambisols (0.63 for  $[C]$  vs. 0.39 for  $C_s$ ). Also shown in Table 9 are the mean  $C_s$  for the 12 RGS we have  
620 examined as compared to the values given by (Batjes, 1996) for which we note that in the  
621 majority of cases our estimates are surprisingly close: with one exception being the Alisols for which our  
622 estimate of around  $46 \text{ t C ha}^{-1}$  is only 53% that of the Batjes (1996) estimate of *ca.*  $86 \text{ t C ha}^{-1}$  to 0.3 m depth.  
623 Our Leptosols and Podzol  $C_s$  estimates are also much higher than those of Batjes (1996).

624

#### 625 4 Discussion

626 According to our analysis, the three soil groups studied here are characterised by different soil C stabilization  
627 ~~stabilisation~~ mechanisms. Specifically, highly weathered soils, dominated by low activity clays such as  
628 Ferralsols and Acrisols (our LAC group) have SOC densities that are strongly dependent on their clay and  
629 silt contents. However, such simple relationships with ~~soil~~ fine earth fraction could not explain SOC  
630 variations ~~in~~ for the less weathered soils. For the HAC grouping, ~~with~~ SOC stabilization ~~was is~~  
631 predominantly related to interactions with Al, and the formation of Al/organic matter coprecipitates ~~for HAC~~  
632 grouping. For our Arenic soils group, it appears that most of the SOC present is in loose particulate organic  
633 matter form, and therefore not stabilized by mineral interactions, though with a surprisingly strong effect of  
634 their small clay and silt content variations.

635 Such differences in the stabilization mechanisms can be considered to arise from the different soils examined  
636 being at contrasting pedogenetic development stages and/or differences in parent material. ~~Highly weathered~~  
637 ~~soils such our LAC group have been under constant tropical weathering rates for timescales that range from~~  
638 100 million to 2 billion years (Hoorn et al., 2010; Quesada et al., 2011), with some of the central and eastern  
639 Amazon Basin soils having suffered several cycles of weathering (Herrera et al., 1978; Irion, 1978; Quesada  
640 and Lloyd, 2016). This extreme weathering ~~of~~ LAC soils has resulted in a deep uniformisation of their  
641 mineralogy, which is dominated by kaolinite (Sombroek, 1984), and in the depletion of rock derived  
642 elements. It has also resulted in the development of favorable soil physical properties such as free drainage,  
643 low bulk densities and the formation of very deep soil horizons (Quesada et al. 2010).

644 Nevertheless, it also needs to be remembered that the Amazon Basin has a complex mosaic of soils,  
645 with *ca.* 40% having young and intermediate pedogenetic development levels (Quesada et al., 2011; Richter  
646 and Babbar, 1991; Sanchez, 1976). Most of these less weathered soils occur in the west of the Basin and were  
647 influenced by the uprising of the Andean Cordillera (Hoorn et al., 2010) and thus having much younger  
648 geological ages. Much of the soil formation process in this region only came into effect after the Pliocene,  
649 with most of the soils-substrate in that region having less than 2 million years (Hoorn and Wesselingh, 2011;  
650 Quesada et al., 2011; Quesada and Lloyd, 2016). Soils in that region have a diverse mineralogy, with high  
651 abundance of 2:1 clays and sometimes also some rock derived easily weatherable minerals ~~and relatively~~  
652 ~~high levels of rock derived~~ (Irion, 1978; Quesada et al., 2010, 2011; Sombroek, 1966, this study). One  
653 important characteristic of many ~~HAC~~ soils is the very high amount of Al that is released through the  
654 weathering of 2:1 clays (Marques et al., 2002). High active clays are unstable in environments depleted of  
655 silica, alkaline and alkaline earth cations, thus releasing soluble aluminium from the octahedral internal layers  
656 of the 2:1 clay minerals, and with such Al release also increasing with depth (Quesada et al. 2011).

657 The Arenic soil group on the other hand is strongly influenced by its parent material. It comprises  
658 the Arenosol and Podzol reference groups, with the latter also being predominantly sandy in Amazonia (Do  
659 Nascimento et al., 2004). Both soil types are thought to have evolved from the weathering of aeolian and  
660 riverine sediments of siliceous rocks, or in some cases, being locally weathered and deposited in colluvial

661 zones through selective erosion (Buol et al., 2011; Driessen et al., 2000). As quartz usually makes up more  
662 than 90% of their mineral fraction, their surface exchange capacity is very small, resulting in very low nutrient  
663 levels as a consequence of a high degree of leaching (Buol et al., 2011; Quesada et al., 2010; 2011). The very  
664 low nutrient content of these soils, often associated with high groundwater levels, results in the formation of  
665 thick root mats in the soil surface (Herrera et al. 1978) which then strongly influences the amount and vertical  
666 distribution of their SOC stocks.

667 Therefore, our HAC, LAC and Arenic soils groups consist in very different soils, with contrasting  
668 geological formation and chemical and physical properties. Not surprisingly, such wide variations also  
669 resulted in different mechanisms of SOC stabilization.

670

#### 671 4.1 Mechanisms of SOC stabilization

##### 672 4.1.1 SOC stabilization in low activity clay soilss

673 Since soil C content might reasonably be expected to depend, at least in part, on specific surface area (SSA)  
674 because a higher density of exchange sites per unit volume should result in more soil carbon stabilization  
675 through mineral-organic matter associations (Saidy et al. 2012), the uniform mineralogy of 1:1 soils means  
676 that, as ~~is~~ shown in Figure 5 and elsewhere (Burke et al., 1989; Dick et al., 2005; Feller and Beare, 1997;  
677 Telles et al., 2003), ~~that~~ for LAC soil organic C scales linearly with clay content since, at the variation in clay  
678 content is the main source of variation in SSA.

679 The observed variation in clay fractions content across LAC soils studied here was large, from 0.05  
680 to 0.89. This reflects differences in parent material, with Acrisols tending to have sandier top soils (West et  
681 al., 1997). Central and East Amazonia are known for having very clay rich soils, often having clay content  
682 well above 60% (Chauvel et al., 1987; Sombroek, 1966) with such clays originating from ancient fluvio-  
683 lacustrine sediments deposited on the Barreiras and Alter do Chão geological formations locally known as  
684 Belterra clays (Sioli, 1984; Sombroek, 1966, 2000). Other regions where Ferralsols dominate, such as the  
685 southern fringe of the Basin (Quesada et al. 2010), often have much sandier soils.

686 The uniformity in the clay vs. C relationships shown by our best OLS models indicate an overruling  
687 effect of clay content and with some effect from silt (Table 4). The superior predictive power of sand content  
688 ( $-\text{[clay+silt]}$ ), compared to clay as a main determinant of SOC in highly weathered tropical soils has already  
689 been shown by Saiz et al. (2012), with these authors concluding that sand content shows less confounding  
690 effects than that of clay in these systems. The association of clay with aluminum and iron oxides in highly  
691 weathered tropical soils may promote the formation of sesquioxides. Saiz et al. (2012) have shown that these  
692 particles confer the soil a coarse-like texture, which exerts a strong influence on soil bulk density and water  
693 retention properties. Furthermore, results from Figure 3a,c also suggest a wide variation of Fe oxides to occur  
694 on LAC soils and with Figure 6 and Tables 3 and 5 indicating that the abundance of  $\text{Al}_d$  is also correlated

695 with SOC. This could be related to increments in SSA resulting from the greater abundance of such minerals  
696 (Eusterhues et al. 2005, Kleber et al. 2005, Wiseman and Püttmann 2006, Saïdy et al. 2012) in which an  
697 increment in the number of exchange sites may provide additional stabilization of carbon via direct  
698 complexation (Parfitt et al., 1997; Schwertmann et al., 2005) and with direct interactions between SOC, Fe  
699 and Al oxides, and clay particles (Wiseman and Püttmann 2006) also being important. However, Fe and Al  
700 hydroxides may also indirectly protect carbon from decomposition through their role in the formation of  
701 stable aggregates which make carbon physically inaccessible to decomposers (Kitagawa 1983, Six et al.,  
702 2004; Wagai and Mayer 2007). This may be of importance for LAC soils since stable clay aggregates were  
703 found to store most of SOC (Section 3.5).

704 Using [the Zimmerman et al. \(2007\)](#) soil carbon fractionations to gain further insights on the  
705 stabilization mechanisms that underlie soil organic matter dynamics (Denef et al., 2010), Fig. 11a shows that  
706 the sand and aggregate (S + A) fraction is responsible for holding most of SOC in LAC soils. This fraction  
707 is essentially formed by a mixture of clay, silt, oxides and organic matter, and within this fraction aggregation  
708 may promote increased SOC protection as it influences the accessibility of substrate to microorganisms, thus  
709 limiting the extent that the diffusion of reactants and products from extracellular synthesis (i.e. soil enzymes)  
710 can reach the organic matter (Sollins et al., 1996). For example, pore spaces inside aggregates can be too  
711 small to allow access of bacteria (Van Veen and Kuikman, 1990) and efficient enzyme diffusion (Sollins et  
712 al. 1996). This then retains SOC in inaccessible micropores inside aggregates (Baldock and Skjemstad, 2000)  
713 which ultimately protects SOC from decay, explaining the positive correlation often found between the level  
714 of soil aggregation and SOC concentration (Six et al., 2004; Tisdall and Oades, 1982).

715 Soil aggregation level is also affected by other chemical, microbial, plant, animal and physical  
716 processes, many of which seem to be favoured by the tropical climate and thriving biological activity of the  
717 tropical moist forest environment. For instance, microbial activity releases polysaccharides that act as binding  
718 agents in soil aggregates (Lynch and Bragg, 1985; Oades, 1993) and fungal hyphae are known to bind solid  
719 particles together (Sollins et al. 1996). Plant roots also influence soil aggregation by releasing exudates that  
720 can directly flocculate colloids and bind or stabilize aggregates (Glinski, 2018). Root exudates may also  
721 foster microbial activity which can lead to aggregate formation and stabilization. Plant roots and associated  
722 hyphae can also enmesh soil particles by acting as a "sticky string bag" (Oades, 1993) which binds soil  
723 particles. ~~Also,~~ ~~Further,~~ the pressure exerted by roots and soil fauna on soil ~~also~~ promotes aggregation (Oades  
724 1993; Sollins et al. 1996). Soil fauna (including earthworms, termites, collembola, beetles, isopods and  
725 milipeds) form fecal pellets and excrete binding agents that form aggregates (Oades 1993; Sollins et al. 1996).  
726 Nevertheless, the presence of Fe and Al oxides in these soils may also favour the formation of soil aggregates  
727 (Kitagawa 1983, Wagai and Mayer 2007) since they act as binding agents with clays in a process thought to  
728 be associated to the large abundance of aggregates in Ferralsols and Acrisols (Paul et al., 2008; Sanchez,  
729 1976; Sollins et al., 1996).

730 Soil C stabilization in the surface of Amazonian Ferralsols and Acrisols (1:1 clays) is thus  
731 interpreted here as the summation of the effect of variations in kaolinite clay content (varying SSA) and the  
732 additional physical protection given by the extensive level of aggregation common to these soils.

733

#### 734 4.1.2 Processes of C ~~retention-stabilization~~ in ~~sandy-arenic~~ soils

735 Since quartz is devoid of significant surface area and exchange sites, the retention of SOC in sand rich soils  
736 is difficult to predict on the basis of soil physiochemical properties as there is no, or very little, mineral-  
737 organic matter interaction. Thus, the bulk SOC variation in our Arenic soil group most likely reflects varying  
738 edapho-environmental conditions such as groundwater levels and/or moisture regimes, vertical root  
739 distribution and/or litter quality. However, small changes in clay and silt content were still found to have  
740 large effects on soil [C] (Table 4), with this OLS regression giving a slope ten-fold greater than that of LAC  
741 soils. This is similar to what Hartemink and Huting (2008) found for 150 Arenosols in Southern Africa, where  
742 soil carbon content varied from about 0.5 to 12 g kg<sup>-1</sup> along a change in clay fraction ranging from  
743 effectively zero to just 0.12. Similar findings (i.e. 0.8 to 14.5 g kg<sup>-1</sup>) were also obtained on heavily coarse-  
744 textured soils sampled along a 1000 km moisture gradient spanning from Southern Botswana, into southern  
745 Zambia (Bird et al., 2004).

746 In addition, groundwater fluctuations and the often extremely low nutrient availability of these soils  
747 often result in the formation of root mats, covering the top 10 to 50 cm of the soil surface with an impressive  
748 mixture of roots and organic matter in different stages of decomposition (Herrera et al. 1978). Such soil mats  
749 may reasonably be expected to exert a strong influence on soil SOC concentrations, since they concentrate  
750 the inputs of organic matter into a single layer close to the surface. Moreover, because many of these soils  
751 are seasonally waterlogged (Quesada et al. 2011) the associated anaerobic conditions should also inhibit  
752 decomposition. It is therefore not a surprise then that we observed some of the highest [C] in these soils.

753 Our fractionation results again provided additional information for the understanding of SOC  
754 retention with the bulk of the SOC in Arenic soils found as free particulate organic matter, and with this  
755 proportion increasing as [C] increases (Fig. 11b). This was particularly the case for seasonally wet sands (up  
756 to 60% of SOC), but with POM also being a significant fraction of the total SOC even in the drier sands (~  
757 30%). The implication here is that chemical recalcitrance of organic matter may also have a role in these  
758 soils: favouring the maintenance of residual, hard to decay organic particles.

759 ~~The latter are thought~~ High chemical recalcitrance may be to be common ~~due to the in such~~ extremely  
760 dystrophic ~~arenic status of these~~ soils, with total P levels often as low as 10 mg kg<sup>-1</sup> ~~and with Total these P~~  
761 ~~in LAC soils is being~~ ca. 10-fold ~~10-fold~~ greater ~~than than in arenic, in LAC soils~~ and generally 20-50 times  
762 greater in HAC soils (~~see~~ Quesada et al. 2010 ~~for further details~~). Such a low level of nutrient content often  
763 results in high levels of plant investment in secondary defense compounds against herbivory (Coley et al.,  
764 1985; Fine et al., 2004) and such chemical recalcitrance may affect the decomposition process and thus slight

765 increase residence time of uncomplexed C in the soil. This may affect POM levels particularly, considering  
766 that the most recalcitrant part will have a slower turnover, or be left undecomposed following microbial  
767 attack. This is given support by the observations made by Luizão and Schubart (1987), who found that leaf  
768 litter decomposition in Amazonian white sands takes twice as long than for Ferralsols and Acrisols during  
769 the dry season, and nearly seven times longer in the wet season when decomposition is more dynamic in the  
770 non-white sand soils. Organic acids from residual decomposition from these soils are known to colour the  
771 rivers of the region, with the Rio Negro -with its head waters within a vast white sand forest region (Quesada  
772 et al. 2011) getting its name by virtue of its high humic and fulvic acid content (Fittkau, 1971).

773

#### 774 4.1.3 SOC stabilization in less weathered high activity clay soils

775 Our results suggest that Al/organic matter (Al/OM) interaction, or coprecipitation is a fundamental  
776 mechanism of SOC stabilization for the less weathered HAC forest soils of the Amazon Basin with the OLS  
777 models presented here involving complex interactions between Al species (Al<sub>d</sub>), soil pH and the abundance  
778 of aromatic, carboxyl-rich organic matter. The complexity of the models and their high ability to explain  
779 SOC densities suggest that this mechanism is fundamental to an understanding of HAC soil C storage.

780 To our knowledge this is the first time that Al/OM interactions have been suggested as a key factor  
781 explaining SOC densities in the Amazon forest soils. Nevertheless, with DOC being ubiquitously present  
782 in such a highly dynamic system, and with exchangeable Al often abundant as has already been shown to be  
783 the case in western Amazon soils (Quesada et al. 2010; 2011, Marques et al. 2002; this study), it is intuitive  
784 that Al/OM interactions should encompass a continuum from low-polymeric metal-organic complexes to  
785 well crystalline phases with surface attached organic matter (Kleber et al., 2015). Thus Al/OM interactions  
786 forming coprecipitates is likely to be a widespread mechanism that has previously been overlooked because  
787 most of the studies in the Amazon Basin have to date only focused on highly weathered soils such as  
788 Ferralsols and Acrisols (i.e. Telles et al., 2003). Nevertheless, with less weathered soils occupying circa 40%  
789 of the Amazon Basin (Quesada et al. 2011), it is important to further investigate the role of Al/OM  
790 interactions, in particular with regard to their influence over SOC mean residence times (MRT), since they  
791 are likely to be different from what is known for Ferralsols. For example, MRT of SOC in Amazon Ferralsols  
792 is about 10 years (Trumbore and Camargo 2009) as determined by <sup>14</sup>C studies, but to our knowledge, no <sup>14</sup>C  
793 information is available for western Amazon soils, nor is such information is available for MRT of Al/OM  
794 co-precipitates. As organic polyelectrolytes reorganize on mineral surfaces over time, they form additional  
795 polar covalent bonds; and this aging process can then lead to a decreased desorbability of OM (Kleber et al.  
796 2015). So that MRT of Al/OM co-precipitates could well extend to decades or even centuries.

797 In that respect, it is clear that organic matter becoming co-precipitated with Al results in it  
798 becoming more resistant to microbial decay (Kalbitz and Kaiser, 2008; Nierop et al., 2002). At Al/OM  
799 concentrations typical of forest soils, up to 80% of DOC can coprecipitate (Nierop et al. 2002; Scheel et al.



800 2007) and with mineralisation rates of Al/OM coprecipitates formed from DOM much lower than the  
801 compounds from which it originates (Boudot et al., 1989; Scheel et al., 2007). For instance, using incubations,  
802 Scheel et al. (2007) found that the mineralisation extent of Al/OM precipitates ranged from 0.5 to 7.7% while  
803 the DOM that originated the precipitates had much higher rates (5 to 49%). Kalbitz and Kaiser (2008) found  
804 that up to 50% of total SOC in their study site was stabilized from DOM following Al/OM interaction, with  
805 the authors suggesting that Al coprecipitation has a stronger capacity to reduce mineralization than sorption  
806 in phyllosilicates.

807 The formation of Al/OM coprecipitates is influenced by several factors and interacting processes  
808 with, according to the extensive review from Kleber et al. (2015), the most important factors being the  
809 prevalent metal to carbon ratios in the soil solution (M/C), the presence of aromatic organic compounds, the  
810 pH value of soil solution and the metal species present (in which Fe also may have a role). Increasing M/C  
811 ratios increase the probability of reaction with OM while the solution pH controls the solubility and speciation  
812 of metals (Al, Fe). With an increasing pH, the efficiency of the process increases, causing larger amounts of  
813 precipitates (Scheel et al. 2007). Also, co-precipitation occurs preferentially with aromatic, carboxyl-rich  
814 organic structures such as derived from lignin and tannin decomposition due to their higher affinity for Al  
815 complexation sites (Scheel et al. 2007; 2008; Kleber et al. 2015), interactions which were also made clear  
816 through the importance of litter lignin content and soil C/N ratio in our OLS results. With regard to metal  
817 speciation, our OLS models selected for dithionite extractable Al ( $Al_d$ ) which, having a broad capacity to  
818 extract Al bearing minerals, we interpret as a continuum of likely different forms such as free Al ( $Al^{+3}$ ), Al  
819 from Al-interlayer minerals, Al-OM complexes and both crystalline and amorphous Al hydroxides  
820 (particularly at higher pH values).

821 In interpreting the use of soil C:N ratios as a surrogate for litter quality it needs to be borne in mind,  
822 however, that because  $\log(C/N) = \log[C] - \log[N]$ , this means that embedded in equation 6s is what is  
823 known as a “whole-part” correlation (Chayes, 1971) (Chayes, 1971). Formula and randomisation techniques  
824 exist to estimate the extent to slopes and correlation coefficients may be biased by the presence of the same  
825 terms on both sides for OLS regression equations if their (co) variances and/or correlations are known  
826 (Bartko and Pettigrew 1968; Lloyd et al. 2013) (Bartko and Pettigrew, 1968; Lloyd et al., 2013). But  
827 unfortunately, due to complex interactions between the fitted terms is such a situation, these cannot be readily  
828 applied in a multivariate context (Lloyd et al. 2013). Nevertheless we can say that, even though the observed  
829 (bivariate) correlation between  $\log[C]$  and  $\log(CN)$  for the HAC soils in our dataset is relatively low ( $r^2$   
830 =0.23) it is almost certain that the relatively steep log-log slope of 1.16 for the  $\log(CN)$  effect within Table  
831 6 is inflated. Thus, caution would need to be exercised in applying this equation in any sort of predictive  
832 framework.

833

834 Further insights into carbon stabilisation stabilization mechanisms may again be found from the  
835 fractionations study. Specifically, with Fig 11c suggesting that for HAC the Al/OM precipitates are held

836 together within C+S fractions, this ~~being~~ despite there being no simple correlations with clay fraction in the  
837 extended dataset. Although this could perhaps be attributed to the use of only a subset of sites used in the  
838 fractionation analysis, where the reduced dataset shows stronger associations between [C] and clay content,  
839 we suggest that such colloidal sized Al/OM precipitates should be stored alongside the fine earth fraction.  
840 Remarkably 75% of SOC occurs associated to C+S (and its resistant fraction) in these soils, with this fraction  
841 being reasonably consistent across a range of soil [C].

842

#### 843 4.2 Possible influences of confounding factors

844 As noted in the Introduction, our approach to modelling the [C] storage potential has ~~here~~ been primarily  
845 hypothesis based, but also as noted in Section 3.6, there were some models that – on the basis of their AIC –  
846 ~~– are statistically did appear~~ superior to those presented as best models here. For example, in modelling the  
847 [C] storage of HAC soils solely on the basis of soil mineralogical properties, then a model ~~also~~ including  
848 both Fe<sub>o</sub> and Al<sub>o</sub> seemed to be the best (equation of Table 6q). Nevertheless, following our rationalisation  
849 that plant organic matter quality inputs should also be important, once ~~the surrogate~~ soil CN ratio ~~metric data~~  
850 was added to the model, then the ~~hard-difficult~~ to explain apparent negative Fe<sub>o</sub> effect became redundant  
851 (equations of Table 6r and Table 6s). Likewise in Section 3.6 we also noted that Total Reserve Bases seemed  
852 to be a better predictor than pH in a model of soil C stocks with [Al]<sub>d</sub> and CN ratio as covariates, we chose  
853 pH for our final model on the basis of its known effect of the SOC precipitation process and with the apparent  
854 ~~TRB-Total Reserve Bases~~ effect rationalized as a simple consequence of its high correlation with pH in HAC  
855 soils ( $r = 0.52$ ;  $p < 0.0001$ : Table 3).

856 Also, not included in our final models were the effects of either mean annual temperature or  
857 precipitation, for which, as well as showing poor associations with SOM storage for all three of our soil  
858 groups when considered individually as well as when all soils were pooled together as a whole, also showed  
859 no significant association with model residuals (Appendix Figure A1). Nor – as is ~~suggested by the lack of~~  
860 ~~any systematic bias of model residues with aboveground wood productivity also shown in Appendix Figure~~  
861 ~~A1~~ – was ~~n't~~ there any suggestions of variations in carbon inputs ~~having any influence on Amazon~~ forest  
862 C stocks. This suggests that, across the temperature and precipitation range of our dataset that litter input  
863 quality and soil mineral stabilization mechanisms are the primary determinants of the SOM storage  
864 variations: – a result which is consistent with microbial decomposition rates acclimating to both – temperature  
865 (Bradford et al., 2008) and precipitation (Deng et al., 2012).

866 ~~That is not to say of course, that our results also mean that any future changes in temperature or~~  
867 ~~precipitation should inevitably have no effect on the amount of carbon stored in the forests of the Amazon~~  
868 ~~Basin. Our findings do not negate the possibility that future climate changes will have a significant impact on~~  
869 ~~soil carbon stocks in the Amazon Basin.~~ For example, Cotrufo et al., (2013) have postulated that although  
870 interactions of organic materials within the soil mineral matrix are the ultimate controllers of SOM

871 stabilization over long timescales, it is the microbially mediated delivery of organic products to this matrix  
872 that provides the critical link between plant litter inputs and what products are available for stabilization. In  
873 this respect a consideration of depths substantially greater than the upper 0.3 m examined here must also be  
874 critical for the accurate determination of any future changes in climate stocks, as below 0.3 m Amazon Basin  
875 forest soil C are generally quite low, and with there likely existing reactive mineral surfaces yet to be saturated  
876 with SOM (Quesada, 2008; Quesada et al., 2010). Moreover, any future inputs into these lower layers, ~~for~~  
877 ~~example— as might be including those —~~mediated though increased litter inputs ~~due to likely ongoing as a~~  
878 ~~consequence of [ CO<sub>2</sub> fertilization ] induced increases in stand level productivities:~~ (Lloyd and Farquhar,  
879 2008), are likely to be microbially derived (Schrumpf et al., 2013). Quite likely the extent of any such  
880 additional stabilization of SOM at these lower depths will differ between HAC, LAC and Arenic soils in  
881 accordance with the different stabilization mechanisms as suggested throughout this paper. But in the absence  
882 of more detailed information and indeed, precise confirmations as to the apparent different mechanisms  
883 involved in SOM storage as suggested here; then whether or not it is really the case that Amazon forest soil  
884 C stocks are currently increasing in response to higher litter inputs with soil developmental stage also  
885 influencing that response must remain a matter of simple conjecture.

## 886 5 Acknowledgements

887 This manuscript is a product of the RAINFOR network. It integrates the effort of several researchers,  
888 technicians and field assistants across Amazonia. We thank the following individuals in particular: Michael  
889 Schwarz, Gabriel Batista de Oliveira Borges, Claudia Czimczk, Jens Schmerler, Alexandre J.B. Santos,  
890 Gareth Lloyd, Jonas O. Moraes Filho, Orlando F. C. Junior, José Edivaldo Chaves and Raimundo Nonato  
891 de Araújo Filho. Support for RAINFOR has come from the Natural Environment Research Council (NERC)  
892 Urgency Grants and “TROBIT” (NE/D005590/1) and the Gordon and Betty Moore Foundation. [Jon Lloyd](#)  
893 [was supported by a Royal Society of London Research Merit Award and a São Paulo Excellence Chair.](#)

## 894 6 References

895 [Baldock, J. A. and Skjemstad, J. O.: Role of the soil matrix and minerals in protecting natural](#)  
896 [organic materials against biological attack, \*Organic geochemistry\*, 31\(7–8\), 697–710, 2000.](#)

897 [Bartko, J. J. and Pettigrew, K. D.: The Teacher’s Corner: A Note on the Correlation of Parts with](#)  
898 [Wholes, \*The American Statistician\*, 22\(4\), 41–41, 1968.](#)

899 [Bartoń, K.: MuMIn: Multi-model inference. R package version 1.9. 13, \*The Comprehensive R\*](#)  
900 [Archive Network \(CRAN\), Vienna, Austria., 2013.](#)

901 [Basile-Doelsch, I., Amundson, R., Stone, W. E. E., Masiello, C. A., Bottero, J. Y., Colin, F.,](#)  
902 [Masin, F., Borschneck, D. and Meunier, J. D.: Mineralogical control of organic carbon dynamics](#)  
903 [in a volcanic ash soil on La Réunion, \*European Journal of Soil Science\*, 56\(6\), 689–703, 2005.](#)

- 904 [Batjes, N. H.: Total carbon and nitrogen in the soils of the world, European journal of soil](#)  
905 [science, 47\(2\), 151–163, 1996.](#)
- 906 [Batjes, N. H. and Dijkshoorn, J. A.: Carbon and nitrogen stocks in the soils of the Amazon](#)  
907 [Region, Geoderma, 89\(3–4\), 273–286, 1999.](#)
- 908 [van den Boogaart, K. G. and Tolosana-Delgado, R.: “Compositions”: a unified R package to](#)  
909 [analyze compositional data, Computers & Geosciences, 34\(4\), 320–338, 2008.](#)
- 910 [Boudot, J. P., Hadj, A. B., Steiman, R. and Seigle-Murandi, F.: Biodegradation of synthetic](#)  
911 [organo-metallic complexes of iron and aluminium with selected metal to carbon ratios, Soil](#)  
912 [Biology and Biochemistry, 21\(7\), 961–966, 1989.](#)
- 913 [Bradford, M. A., Davies, C. A., Frey, S. D., Maddox, T. R., Melillo, J. M., Mohan, J. E.,](#)  
914 [Reynolds, J. F., Treseder, K. K. and Wallenstein, M. D.: Thermal adaptation of soil microbial](#)  
915 [respiration to elevated temperature, Ecology Letters, 11\(12\), 1316–1327, 2008.](#)
- 916 [Bruun, T. B., Elberling, B. and Christensen, B. T.: Lability of soil organic carbon in tropical soils](#)  
917 [with different clay minerals, Soil Biology and Biochemistry, 42\(6\), 888–895, 2010.](#)
- 918 [Buol, S. W., Southard, R. J., Graham, R. C. and McDaniel, P. A.: Soil genesis and classification,](#)  
919 [John Wiley & Sons., 2011.](#)
- 920 [Burke, I. C., Yonker, C. M., Parton, W. J., Cole, C. V., Schimel, D. S. and Flach, K.: Texture,](#)  
921 [climate, and cultivation effects on soil organic matter content in US grassland soils, Soil science](#)  
922 [society of America journal, 53\(3\), 800–805, 1989.](#)
- 923 [Chauvel, A., Lucas, Y. and Boulet, R.: On the genesis of the soil mantle of the region of Manaus,](#)  
924 [Central Amazonia, Brazil, Cellular and Molecular Life Sciences, 43\(3\), 234–241,](#)  
925 [doi:10.1007/bf01945546, 1987.](#)
- 926 [Chayes, F.: Ratio correlation: a manual for students of petrology and geochemistry, University of](#)  
927 [Chicago Press., 1971.](#)
- 928 [Coley, P. D., Bryant, J. P. and Chapin, F. S. I.: Resource availability and plant antiherbivore](#)  
929 [defense, Science, 230, 895–899, doi:10.1126/science.230.4728.895, 1985.](#)
- 930 [Cotrufo, M. F., Wallenstein, M. D., Boot, C. M., Deneff, K. and Paul, E.: The Microbial E](#)  
931 [fficiency-Matrix Stabilization \(MEMS\) framework integrates plant litter decomposition with](#)  
932 [soil organic matter stabilization: do labile plant inputs form stable soil organic matter?, Global](#)  
933 [Change Biology, 19\(4\), 988–995, 2013.](#)
- 934 [De Mendiburu, F.: Agricolae: statistical procedures for agricultural research., 2017.](#)
- 935 [Delvaux, B., Herbillon, A. J. and Vielvoye, L.: Characterization of a weathering sequence of soils](#)  
936 [derived from volcanic ash in Cameroon: Taxonomic, mineralogical and agronomic implications,](#)  
937 [Geoderma, 45, 375–388, doi:10.1016/0016-7061\(89\)90017-7, 1989.](#)
- 938 [Deneff, K., Plante, A. F. and Six, J.: Characterization of soil organic matter, in Soil carbon](#)  
939 [dynamics: An integrated methodology, Cambridge University Press., 2010.](#)

- 940 [Deng, Q., Hui, D., Zhang, D., Zhou, G., Liu, J., Liu, S., Chu, G. and Li, J.: Effects of](#)  
941 [precipitation increase on soil respiration: a three-year field experiment in subtropical forests in](#)  
942 [China, PLoS One, 7\(7\), e41493, 2012.](#)
- 943 [Dick, D. P., Gonçalves, C. N., Dalmolin, R. S., Knicker, H., Klamt, E., Kögel-Knabner, I.,](#)  
944 [Simões, M. L. and Martin-Neto, L.: Characteristics of soil organic matter of different Brazilian](#)  
945 [Ferralsols under native vegetation as a function of soil depth, Geoderma, 124\(3–4\), 319–333,](#)  
946 [2005.](#)
- 947 [Do Nascimento, N. R., Bueno, G. T., Fritsch, E., Herbillon, A. J., Allard, T., Melfi, A. J., Astolfo,](#)  
948 [R., Boucher, H. and Li, Y.: Podzolization as a deferralitization process: a study of an Acrisol–](#)  
949 [Podzol sequence derived from Palaeozoic sandstones in the northern upper Amazon Basin,](#)  
950 [European journal of soil science, 55\(3\), 523–538, 2004.](#)
- 951 [Driessen, P., Deckers, J., Spaargaren, O. and Nachtergaele, F.: Lecture notes on the major soils of](#)  
952 [the world., Food and Agriculture Organization \(FAO\)., 2000.](#)
- 953 [Eusterhues, K., Rumpel, C. and Kögel-Knabner, I.: Stabilization of soil organic matter isolated](#)  
954 [via oxidative degradation, Organic geochemistry, 36\(11\), 1567–1575, 2005.](#)
- 955 [Feller, C. and Beare, M. H.: Physical control of soil organic matter dynamics in the tropics,](#)  
956 [Geoderma, 79\(1–4\), 69–116, 1997.](#)
- 957 [Fine, P. V., Mesones, I. and Coley, P. D.: Herbivores promote habitat specialization by trees in](#)  
958 [Amazonian forests, science, 305\(5684\), 663–665, 2004.](#)
- 959 [Fittkau, E. J.: Esboco de uma divisao ecologica da regio Amazonica, edited by I. M. Idrobo, pp.](#)  
960 [363–372., 1971.](#)
- 961 [Gee, G. W. and Bauder, J. W.: Particle-size analysis, in Methods in Soil Analysis, Part 1,](#)  
962 [Physical and Mineralogical Methods, edited by A. Klute, pp. 383– 409, American Society of](#)  
963 [Agronomy and Soil Science Society of America, Madison, Wisconsin, USA., 1986.](#)
- 964 [Giraudoux, P.: pgirmess: data analysis in ecology. R package version 1.5. 8, R Foundation for](#)  
965 [Statistical Computing Vienna, Austria., 2013.](#)
- 966 [Glinski, J.: Soil Physical Conditions and Plant Roots: 0, CRC press., 2018.](#)
- 967 [Hartemink, A. E. and Huting, J.: Land cover, extent, and properties of Arenosols in Southern](#)  
968 [Africa, Arid Land Research and Management, 22\(2\), 134–147, 2008.](#)
- 969 [Herrera, R., Jordan, C. F., Klinge, H. and Medina, E.: Amazon ecosystems: Their structure and](#)  
970 [functioning with particular emphasis on nutrients, Interciencia, 3, 223–232, 1978.](#)
- 971 [Hoorn, C. and Wesselingh, F.: Amazonia: landscape and species evolution: a look into the past,](#)  
972 [John Wiley & Sons., 2011.](#)
- 973 [Hoorn, C., Wesselingh, F. P., Ter Steege, H., Bermudez, M. A., Mora, A., Sevink, J., Sanmartín,](#)  
974 [I., Sanchez-Meseguer, A., Anderson, C. L. and Figueiredo, J. P.: Amazonia through time: Andean](#)  
975 [uplift, climate change, landscape evolution, and biodiversity, science, 330\(6006\), 927–931, 2010.](#)

- 1976 [Irion, G.: Soil infertility in the Amazonian rain forest, \*Naturwissenschaften\*, 65, 515–519,](#)  
1977 [doi:10.1007/BF00439791, 1978.](#)
- 1978 [IUSS \(International Union of Soil Science\) Working Group WRB: World Reference Base for Soil](#)  
1979 [Resources 2014. International Soil Classification System For Naming Soils And Creating](#)  
1980 [Legends For Soil Maps, Rome., 2014.](#)
- 1981 [Jahn, R., Blume, H.-P., Asio, V. B., Spaargaren, O. and Schad, P.: Guidelines for soil description,](#)  
1982 [FAO, Rome., 2006.](#)
- 1983 [Kahle, M., Kleber, M., Torn, M. S. and Jahn, R.: Carbon storage in coarse and fine clay fractions](#)  
1984 [of illitic soils, \*Soil Science Society of America Journal\*, 67\(6\), 1732–1739, 2003.](#)
- 1985 [Kahle, M., Kleber, M. and Jahn, R.: Retention of dissolved organic matter by phyllosilicate and](#)  
1986 [soil clay fractions in relation to mineral properties, \*Organic Geochemistry\*, 35\(3\), 269–276, 2004.](#)
- 1987 [Kaiser, K. and Guggenberger, G.: Mineral surfaces and soil organic matter, \*European Journal of\*](#)  
1988 [Soil Science, 54\(2\), 219–236, doi:10.1046/j.1365-2389.2003.00544.x, 2003.](#)
- 1989 [Kaiser, K. and Zech, W.: Sorption of dissolved organic nitrogen by acid subsoil horizons and](#)  
1990 [individual mineral phases, \*European Journal of Soil Science\*, 51\(3\), 403–411, 2000.](#)
- 1991 [Kaiser, K., Mikutta, R. and Guggenberger, G.: Increased stability of organic matter sorbed to](#)  
1992 [ferrihydrite and goethite on aging, \*Soil Science Society of America Journal\*, 71\(3\), 711–719,](#)  
1993 [2007.](#)
- 1994 [Kalbitz, K. and Kaiser, K.: Contribution of dissolved organic matter to carbon storage in forest](#)  
1995 [mineral soils, \*Journal of Plant Nutrition and Soil Science\*, 171\(1\), 52–60, 2008.](#)
- 1996 [Kitagawa, Y.: Goethite and hematite in some soils from the amazon region, \*Soil Science and\*](#)  
1997 [Plant Nutrition, 29\(2\), 209–217, 1983.](#)
- 1998 [Kleber, M., Mikutta, R., Torn, M. S. and Jahn, R.: Poorly crystalline mineral phases protect](#)  
1999 [organic matter in acid subsoil horizons, \*European Journal of Soil Science\*, 56\(6\), 717–725, 2005.](#)
- 1000 [Kleber, M., Eusterhues, K., Keiluweit, M., Mikutta, C., Mikutta, R. and Nico, P. S.: Mineral–](#)  
1001 [organic associations: formation, properties, and relevance in soil environments, in \*Advances in\*](#)  
1002 [agronomy, vol. 130, pp. 1–140, Elsevier., 2015.](#)
- 1003 [Lloyd, J. and Farquhar, G. D.: Effects of rising temperatures and \[CO<sub>2</sub>\] on the physiology of](#)  
1004 [tropical forest trees, \*Philosophical Transactions of the Royal Society B: Biological Sciences\*,](#)  
1005 [363\(1498\), 1811–1817, doi:doi: 10.1098/rstb.2007.0032, 2008.](#)
- 1006 [Lloyd, J., Bloomfield, K., Domingues, T. F. and Farquhar, G. D.: Photosynthetically relevant](#)  
1007 [foliar traits correlating better on a mass vs an area basis: of ecophysiological relevance or just a](#)  
1008 [case of mathematical imperatives and statistical quicksand?, \*New Phytologist\*, 199, 311–321,](#)  
1009 [2013.](#)
- 1010 [Luizão, F. J. and Schubart, H. O. R.: Litter production and decomposition in a terra-firme forest](#)  
1011 [of Central Amazonia, \*Experientia\*, 43\(3\), 259–265, 1987.](#)

- 1012 [Lützw, M. v, Kögel-Knabner, I., Ekschmitt, K., Matzner, E., Guggenberger, G., Marschner, B.](#)  
1013 [and Flessa, H.: Stabilization of organic matter in temperate soils: mechanisms and their relevance](#)  
1014 [under different soil conditions—a review, European Journal of Soil Science, 57\(4\), 426–445, 2006.](#)
- 1015 [Lynch, J. M. and Bragg, E.: Microorganisms and soil aggregate stability, in Advances in soil](#)  
1016 [science, pp. 133–171, Springer., 1985.](#)
- 1017 [Marques, J. J., Teixeira, W. G., Schulze, D. G. and Curi, N.: Mineralogy of soils with unusually](#)  
1018 [high exchangeable Al from the western Amazon Region, Clay Minerals, 37\(4\), 651, 2002.](#)
- 1019 [Mikutta, R., Kleber, M. and Jahn, R.: Poorly crystalline minerals protect organic carbon in clay](#)  
1020 [subfractions from acid subsoil horizons, Geoderma, 128\(1–2\), 106–115, 2005.](#)
- 1021 [Mikutta, R., Mikutta, C., Kalbitz, K., Scheel, T., Kaiser, K. and Jahn, R.: Biodegradation of forest](#)  
1022 [floor organic matter bound to minerals via different binding mechanisms, Geochimica et](#)  
1023 [Cosmochimica Acta, 71\(10\), 2569–2590, 2007.](#)
- 1024 [Nelson, D. W. and Sommers, L. E.: Total carbon and total nitrogen, in Methods of Soil Analysis:](#)  
1025 [Part 3 - Chemical Methods, edited by D. L. Sparks, pp. 961–1010, American Society of](#)  
1026 [Agronomy/Soil Science Society of America, Madison, WI., 1996.](#)
- 1027 [Nierop, K. G., Jansen, B. and Verstraten, J. M.: Dissolved organic matter, aluminium and iron](#)  
1028 [interactions: precipitation induced by metal/carbon ratio, pH and competition, Science of the](#)  
1029 [Total Environment, 300\(1–3\), 201–211, 2002.](#)
- 1030 [Oades, J. M.: An introduction to organic matter in mineral soils, Minerals in soil environments,](#)  
1031 [\(mineralsinsoile\), 89–159, 1989.](#)
- 1032 [Oades, J. M.: The role of biology in the formation, stabilization and degradation of soil structure,](#)  
1033 [in Soil Structure/Soil Biota Interrelationships, pp. 377–400, Elsevier., 1993.](#)
- 1034 [Parfitt, R. L. and Childs, C. W.: Estimation of forms of Fe and Al—a review, and analysis of](#)  
1035 [contrasting soils by dissolution and Mossbauer methods, Soil Research, 26\(1\), 121–144, 1988.](#)
- 1036 [Parfitt, R. L., Theng, B. K. G., Whitton, J. S. and Shepherd, T. G.: Effects of clay minerals and](#)  
1037 [land use on organic matter pools, Geoderma, 75\(1–2\), 1–12, 1997.](#)
- 1038 [Paul, S., Flessa, H., Veldkamp, E. and López-Ulloa, M.: Stabilization of recent soil carbon in the](#)  
1039 [humid tropics following land use changes: evidence from aggregate fractionation and stable](#)  
1040 [isotope analyses, Biogeochemistry, 87\(3\), 247–263, 2008.](#)
- 1041 [Paz, C. P.: Distribuição das frações do carbono orgânico nos solos de florestas maduras na bacia](#)  
1042 [Amazônica: o papel das propriedades do solo, da qualidade da liteira e do clima, 2011.](#)
- 1043 [Pella, E.: Elemental organic analysis, Part 2, State of the art, American Laboratory, 22, 28–32,](#)  
1044 [1990.](#)
- 1045 [Percival, H. J., Parfitt, R. L. and Scott, N. A.: Factors controlling soil carbon levels in New](#)  
1046 [Zealand grasslands is clay content important?, Soil Science Society of America Journal, 64\(5\),](#)  
1047 [1623–1630, 2000.](#)

1048 [Pleysier, J. L. and Juo, A. S. R.: A single-extraction method using silver-thiourea for measuring](#)  
1049 [exchangeable cations and effective CEC in soils with variable charges, Soil Science, 129, 205–](#)  
1050 [211, 1980.](#)

1051 [Quesada, C. A. and Lloyd, J.: Soil–Vegetation Interactions in Amazonia, in Interactions Between](#)  
1052 [Biosphere, Atmosphere and Human Land Use in the Amazon Basin, edited by L. Nagy, B. R.](#)  
1053 [Forsberg, and P. Artaxo, pp. 267–299, Springer Berlin Heidelberg, Berlin, Heidelberg., 2016.](#)

1054 [Quesada, C. A., Lloyd, J., Schwarz, M., Patiño, S., Baker, T. R., Czimczik, C., Fyllas, N. M.,](#)  
1055 [Martinelli, L., Nardoto, G. B., Schmerler, J., Santos, A. J. B., Hodnett, M. G., Herrera, R.,](#)  
1056 [Luizão, F. J., Arneth, A., Lloyd, G., Dezzeo, N., Hilke, I., Kuhlmann, I., Raessler, M., Brand, W.](#)  
1057 [A., Geilmann, H., Moraes Filho, J. O., Carvalho, F. P., Araujo Filho, R. N., Chaves, J. E., Cruz](#)  
1058 [Junior, O. F., Pimentel, T. P. and Paiva, R.: Variations in chemical and physical properties of](#)  
1059 [Amazon forest soils in relation to their genesis, Biogeosciences, 7\(5\), 1515–1541, doi:doi:](#)  
1060 [10.5194/bg-7-1515-2010, 2010.](#)

1061 [Quesada, C. A., Lloyd, J., Anderson, L. O., Fyllas, N. M., Schwarz, M. and Czimczik, C. I.: Soils](#)  
1062 [of Amazonia with particular reference to the RAINFOR sites, Biogeosciences, 8\(\(6\)\), 1415–1440,](#)  
1063 [doi:doi: 10.5194/bg-8-1415-2011, 2011.](#)

1064 [Quesada, C. A. N.: Soil vegetation interactions across Amazonia, University of Leeds \(School of](#)  
1065 [Geography\)., 2008.](#)

1066 [R Development Core Team: R: A Language and Environment for Statistical Computing, edited](#)  
1067 [by Austria, R Foundation for Statistical Computing Vienna Austria, 0\(01/19\), {ISBN} 3-900051-](#)  
1068 [07-0, 2012.](#)

1069 [Richter, D. D. and Babbar, L. I.: Soil diversity in the tropics, in Advances in ecological research,](#)  
1070 [vol. 21, pp. 315–389, Elsevier., 1991.](#)

1071 [Saggar, S., Parshotam, A., Sparling, G. P., Feltham, C. W. and Hart, P. B. S.: 14C-labelled](#)  
1072 [ryegrass turnover and residence times in soils varying in clay content and mineralogy, Soil](#)  
1073 [Biology and Biochemistry, 28\(12\), 1677–1686, 1996.](#)

1074 [Saggar, S., Parshotam, A., Hedley, C. and Salt, G.: 14C-labelled glucose turnover in New](#)  
1075 [Zealand soils, Soil Biology and Biochemistry, 31\(14\), 2025–2037, 1999.](#)

1076 [Saidy, A. R., Smernik, R. J., Baldock, J. A., Kaiser, K., Sanderman, J. and Macdonald, L. M.:](#)  
1077 [Effects of clay mineralogy and hydrous iron oxides on labile organic carbon stabilisation,](#)  
1078 [Geoderma, 173, 104–110, 2012.](#)

1079 [Sanchez, P. A.: Properties and Management of Soils in the Tropics, Wiley, New York., 1976.](#)

1080 [Scheel, T., Dörfler, C. and Kalbitz, K.: Precipitation of dissolved organic matter by aluminum](#)  
1081 [stabilizes carbon in acidic forest soils, Soil Science Society of America Journal, 71\(1\), 64–74,](#)  
1082 [2007.](#)

1083 [Scheel, T., Haumaier, L., Ellerbrock, R. H., Rühlmann, J. and Kalbitz, K.: Properties of organic](#)  
1084 [matter precipitated from acidic forest soil solutions, Organic geochemistry, 39\(10\), 1439–1453,](#)  
1085 [2008.](#)



- 1086 Schrumpf, M., Kaiser, K., Guggenberger, G., Persson, T., Kögel-Knabner, I. and Schulze, E.-D.:  
1087 Storage and stability of organic carbon in soils as related to depth, occlusion within aggregates,  
1088 and attachment to minerals, Biogeosciences, 10, 1675–1691, 2013.
- 1089 Schwertmann, U., Wagner, F. and Knicker, H.: Ferrihydrite–humic associations, Soil Science  
1090 Society of America Journal, 69(4), 1009–1015, 2005.
- 1091 Siegel, S. and Castellan Jr., N.: Nonparametric statistics for the behavioural sciences, 2nd ed.,  
1092 McGraw-Hill, Boston., 1998.
- 1093 Sioli, H.: The Amazon and its main affluents: hydrography, morphology of the river courses, and  
1094 river types, in The Amazon, pp. 127–165, Springer., 1984.
- 1095 Sollins, P., Homann, P. and Caldwell, B. A.: Stabilization and destabilization of soil organic  
1096 matter: mechanisms and controls, Geoderma, 74(1–2), 65–105, 1996.
- 1097 Sombroek, W. G.: A Reconnaissance of the Soils of the Brazilian Amazon Region, Centre for  
1098 Agricultural Publications and Documentation, Wageningen., 1966.
- 1099 Sombroek, W. G.: Soils of the Amazon region, in The Amazon, pp. 521–535, Springer., 1984.
- 1100 Sombroek, W. G.: Amazon landforms and soils in relation to biological diversity, Acta  
1101 Amazonica, 30(1), 81–100, 2000.
- 1102 Telles, E. de C. C., de Camargo, P. B., Martinelli, L. A., Trumbore, S. E., da Costa, E. S., Santos,  
1103 J., Higuchi, N. and Oliveira Jr, R. C.: Influence of soil texture on carbon dynamics and storage  
1104 potential in tropical forest soils of Amazonia, Global Biogeochemical Cycles, 17(2), 2003.
- 1105 Tiessen, H. and Moir, J. O.: Total and Organic Carbon, in Soil Sampling and Methods of  
1106 Analysis, edited by M. R. Carter, pp. 187–199, Lewis Publishers, Boca Raton, FL., 1993.
- 1107 Tisdall, J. M. and Oades, J.: Organic matter and water-stable aggregates in soils, Journal of soil  
1108 science, 33(2), 141–163, 1982.
- 1109 Trumbore, S. E. and Zheng, S.: Comparison of fractionation methods for soil organic matter 14 C  
1110 analysis, Radiocarbon, 38(2), 219–229, 1996.
- 1111 Van Reeuwijk, L. P.: Procedures for soil analysis, 6th ed., International Soil Reference  
1112 Information Centre, ISRIC, Wageningen, the Netherlands., 2002.
- 1113 Van Soest, P. J.: Use of detergents in the analysis of fibrous feeds. 2. A rapid method for the  
1114 determination of fiber and lignin., Journal of the Association of Official Agricultural Chemists,  
1115 46, 829–835, 1963.
- 1116 Van Veen, J. A. and Kuikman, P. J.: Soil structural aspects of decomposition of organic matter by  
1117 micro-organisms, Biogeochemistry, 11(3), 213–233, 1990.
- 1118 Wagai, R. and Mayer, L. M.: Sorptive stabilization of organic matter in soils by hydrous iron  
1119 oxides, Geochimica et Cosmochimica Acta, 71(1), 25–35, 2007.
- 1120 West, L. T., Beinroth, F. H., Sumner, M. E. and Kang, B. T.: Ultisols: Characteristics and impacts  
1121 on society, in Advances in Agronomy, vol. 63, pp. 179–236, Elsevier., 1997.

- 1122 [Wiseman, C. L. S. and Püttmann, W.: Interactions between mineral phases in the preservation of](#)  
1123 [soil organic matter, \*Geoderma\*, 134\(1–2\), 109–118, 2006.](#)
- 1124 [Zimmermann, M., Leifeld, J., Schmidt, M. W. I., Smith, P. and Fuhrer, J.: Measured soil organic](#)  
1125 [matter fractions can be related to pools in the RothC model, \*European Journal of Soil Science\*,](#)  
1126 [58\(3\), 658–667, 2007.](#)
- 1127 [Baldoek, J. A. and Skjemstad, J. O.: Role of the soil matrix and minerals in protecting natural organic](#)  
1128 [materials against biological attack, \*Organic geochemistry\*, 31\(7–8\), 697–710, 2000.](#)
- 1129 [Bartoń, K.: MuMIn: Multi-model inference. R package version 1.9.13, The Comprehensive R Archive](#)  
1130 [Network \(CRAN\), Vienna, Austria., 2013.](#)
- 1131 [Basile-Doelsch, I., Amundson, R., Stone, W. E. E., Masiello, C. A., Bottero, J. Y., Colin, F., Masin, F.,](#)  
1132 [Borschneck, D. and Meunier, J. D.: Mineralogical control of organic carbon dynamics in a volcanic ash soil](#)  
1133 [on La Réunion, \*European Journal of Soil Science\*, 56\(6\), 689–703, 2005.](#)
- 1134 [Batjes, N. H.: Total carbon and nitrogen in the soils of the world, \*European journal of soil science\*,](#)  
1135 [47\(2\), 151–163, 1996.](#)
- 1136 [Batjes, N. H.: Total carbon and nitrogen in the soils of the world, \*European Journal of Soil Science\*,](#)  
1137 [10–21, 2014.](#)
- 1138 [Batjes, N. H. and Dijkshoorn, J. A.: Carbon and nitrogen stocks in the soils of the Amazon Region,](#)  
1139 [Geoderma, 89\(3–4\), 273–286, 1999.](#)
- 1140 [Bird M. I., Veenendaal, E.M. and Lloyd, J.: Soil carbon inventories and  \$\delta^{13}\text{C}\$  along a moisture gradient in](#)  
1141 [Botswana. \*Global Change Biology\*, 10, 342–349, 2004.](#)
- 1142 [van den Boogaart, K. G. and Tolosana Delgado, R.: “Compositions”: a unified R package to analyze](#)  
1143 [compositional data, \*Computers & Geosciences\*, 34\(4\), 320–338, 2008.](#)
- 1144 [Boudot, J. P., Hadj, A. B., Steiman, R. and Seigle-Murandi, F.: Biodegradation of synthetic organo-metallic](#)  
1145 [complexes of iron and aluminium with selected metal to carbon ratios, \*Soil Biology and Biochemistry\*,](#)  
1146 [21\(7\), 961–966, 1989.](#)
- 1147 [Bradford, M. A., Davies, C. A., Frey, S. D., Maddox, T. R., Melillo, J. M., Mohan, J. E., Reynolds, J. F.,](#)  
1148 [Treseder, K. K. and Wallenstein, M. D.: Thermal adaptation of soil microbial respiration to elevated](#)  
1149 [temperature, \*Ecology Letters\*, 11\(12\), 1316–1327, 2008.](#)
- 1150 [Bruun, T. B., Elberling, B. and Christensen, B. T.: Lability of soil organic carbon in tropical soils with](#)  
1151 [different clay minerals, \*Soil Biology and Biochemistry\*, 42\(6\), 888–895, 2010.](#)
- 1152 [Buol, S. W., Southard, R. J., Graham, R. C. and McDaniel, P. A.: Soil genesis and classification, John](#)  
1153 [Wiley & Sons., 2011.](#)
- 1154 [Burke, I. C., Yonker, C. M., Parton, W. J., Cole, C. V., Schimel, D. S. and Flach, K.: Texture, climate, and](#)  
1155 [cultivation effects on soil organic matter content in US grassland soils, \*Soil science society of America\*](#)  
1156 [journal, 53\(3\), 800–805, 1989.](#)
- 1157 [Chauvel, A., Lucas, Y. and Boulet, R.: On the genesis of the soil mantle of the region of Manaus, Central](#)  
1158 [Amazonia, Brazil, \*Cellular and Molecular Life Sciences\*, 43\(3\), 234–241, doi:10.1007/bf01945546, 1987.](#)
- 1159 [Coley, P. D., Bryant, J. P. and Chapin, F. S. I.: Resource availability and plant antiherbivore defense,](#)  
1160 [Science, 230, 895–899, doi:10.1126/science.230.4728.895, 1985.](#)

- 1161 Cornell, R., Schwertmann, U.: *The Iron Oxides: Structure, Properties, Reactions, Occurrence and Uses*.  
1162 VHC Verlag, Weinheim, 1996.
- 1163 Cotrufo, M. F., Wallenstein, M. D., Boot, C. M., Deneff, K. and Paul, E.: The Microbial Efficiency-Matrix  
1164 Stabilization (MEMS) framework integrates plant litter decomposition with soil organic matter  
1165 stabilization: do labile plant inputs form stable soil organic matter?, *Global Change Biology*, 19(4), 988–  
1166 995, 2013.
- 1167 De Mendiburu, F.: *Agricolae: statistical procedures for agricultural research.*, 2017.
- 1168 Delvaux, B., Herbillon, A. J. and Vielvoye, L.: Characterization of a weathering sequence of soils derived  
1169 from volcanic ash in Cameroon: Taxonomic, mineralogical and agronomic implications, *Geoderma*, 45,  
1170 375–388, doi:10.1016/0016-7061(89)90017-7, 1989.
- 1171 Deneff, K., Plante, A. F. and Six, J.: Characterization of soil organic matter, in *Soil carbon dynamics: An  
1172 integrated methodology*, Cambridge University Press., 2010.
- 1173 Deng, Q., Hui, D., Zhang, D., Zhou, G., Liu, J., Liu, S., Chu, G. and Li, J.: Effects of precipitation increase  
1174 on soil respiration: a three year field experiment in subtropical forests in China, *PLoS One*, 7(7), e41493,  
1175 2012.
- 1176 Dick, D. P., Gonçalves, C. N., Dalmolin, R. S., Knicker, H., Klamt, E., Kögel-Knabner, I., Simões, M. L.  
1177 and Martin Neto, L.: Characteristics of soil organic matter of different Brazilian Ferralsols under native  
1178 vegetation as a function of soil depth, *Geoderma*, 124(3–4), 319–333, 2005.
- 1179 Do Nascimento, N. R., Bueno, G. T., Fritsch, E., Herbillon, A. J., Allard, T., Melfi, A. J., Astolfo, R.,  
1180 Boucher, H. and Li, Y.: Podzolization as a deferralitization process: a study of an Acrisol–Podzol sequence  
1181 derived from Palaeozoic sandstones in the northern upper Amazon Basin, *European journal of soil science*,  
1182 55(3), 523–538, 2004.
- 1183 Driessen, P., Deckers, J., Spaargaren, O. and Nachtergaele, F.: *Lecture notes on the major soils of the  
1184 world.*, Food and Agriculture Organization (FAO)., 2000.
- 1185 Eswaran, H., Van Den Berg, E. and Reich, P.: Organic carbon in soils of the world, *Soil science society of  
1186 America journal*, 57(1), 192–194, 1993.
- 1187 Eusterhues, K., Rumpel, C. and Kögel-Knabner, I.: Stabilization of soil organic matter isolated via  
1188 oxidative degradation, *Organic geochemistry*, 36(11), 1567–1575, 2005.
- 1189 Feller, C. and Beare, M. H.: Physical control of soil organic matter dynamics in the tropics, *Geoderma*,  
1190 79(1–4), 69–116, 1997.
- 1191 Fine, P. V., Mesones, I. and Coley, P. D.: Herbivores promote habitat specialization by trees in Amazonian  
1192 forests, *science*, 305(5684), 663–665, 2004.
- 1193 Fittkau, E. J.: *Esboço de uma divisao ecologica da regio Amazonica*, edited by I. M. Idrobo, pp. 363–372.,  
1194 1971.
- 1195 Fyllas, N. M., Patiño, S., Baker, T. R., Bielefeld-Nardoto, G., Martinelli, L. A., Quesada, C. A., Paiva, R.,  
1196 Schwarz, M., Horna, V., Mercado, L. M., Santos, A., Arroyo, L., Jiménez, E. M., Luizão, F. J., Neill, D. A.,  
1197 Silva, N., Prieto, A., Rudas, A., Silveira, M., Vieira, I. C. G., Lopez-Gonzalez, G., Malhi, Y., Phillips, O. L.  
1198 and Lloyd, J.: Basin-wide variations in foliar properties of Amazonian forest: phylogeny, soils and climate,  
1199 *Biogeosciences*, 6(11), 2677–2708, doi:doi: 10.5194/bg-6-2677-2009, 2009.

- 1200 Gee, G. W. and Bauder, J. W.: Particle-size analysis, in *Methods in Soil Analysis, Part 1, Physical and*  
1201 *Mineralogical Methods*, edited by A. Klute, pp. 383–409, American Society of Agronomy and Soil  
1202 Science Society of America, Madison, Wisconsin, USA., 1986.
- 1203 Giraudoux, P.: *pgirmess: data analysis in ecology*. R package version 1.5. 8, R Foundation for Statistical  
1204 Computing Vienna, Austria., 2013.
- 1205 Glinski, J.: *Soil Physical Conditions and Plant Roots: 0*, CRC press., 2018.
- 1206 Hartemink, A. E. and Huting, J.: Land cover, extent, and properties of Arenosols in Southern Africa, *Arid*  
1207 *Land Research and Management*, 22(2), 134–147, 2008.
- 1208 Herrera, R., Jordan, C. F., Klinge, H. and Medina, E.: Amazon ecosystems: Their structure and functioning  
1209 with particular emphasis on nutrients, *Interciencia*, 3, 223–232, 1978.
- 1210 Hiederer, R., Köchy, M.: *Global Soil Organic Carbon Estimates and the Harmonized World Soil Database*.  
1211 Luxembourg: Publ. Off. E.U., 2011.
- 1212 Hoorn, C. and Wesselingh, F.: Amazonia: landscape and species evolution: a look into the past, John Wiley  
1213 & Sons., 2011.
- 1214 Hoorn, C., Wesselingh, F. P., Ter Steege, H., Bermudez, M. A., Mora, A., Sevink, J., Sanmartín, I.,  
1215 Sanchez-Meseguer, A., Anderson, C. L. and Figueiredo, J. P.: Amazonia through time: Andean uplift,  
1216 climate change, landscape evolution, and biodiversity, *science*, 330(6006), 927–931, 2010.
- 1217 Irion, G.: Soil infertility in the Amazonian rain forest, *Naturwissenschaften*, 65, 515–519,  
1218 doi:10.1007/BF00439791, 1978.
- 1219 IUSS (International Union of Soil Science) Working Group WRB: *World Reference Base for Soil*  
1220 *Resources 2014. International Soil Classification System For Naming Soils And Creating Legends For Soil*  
1221 *Maps*, Rome., 2014.
- 1222 Jackson, R. B., Lajtha, K., Crow, S. E., Hugelius, G., Kramer, M. G. and Piñeiro, G.: The Ecology of Soil  
1223 Carbon: Pools, Vulnerabilities, and Biotic and Abiotic Controls, *Annual Review of Ecology, Evolution,*  
1224 *and Systematics*, 48(1), 419–445, doi:10.1146/annurev-ecolsys-112414-054234, 2017.
- 1225 Jahn, R., Blume, H. P., Asio, V. B., Spaargaren, O. and Schad, P.: *Guidelines for soil description*, FAO,  
1226 Rome., 2006.
- 1227 Kahle, M., Kleber, M., Torn, M. S. and Jahn, R.: Carbon storage in coarse and fine clay fractions of illitic  
1228 soils, *Soil Science Society of America Journal*, 67(6), 1732–1739, 2003.
- 1229 Kahle, M., Kleber, M. and Jahn, R.: Retention of dissolved organic matter by phyllosilicate and soil clay  
1230 fractions in relation to mineral properties, *Organic Geochemistry*, 35(3), 269–276, 2004.
- 1231 Kaiser, K. and Guggenberger, G.: Mineral surfaces and soil organic matter, *European Journal of Soil*  
1232 *Science*, 54(2), 219–236, doi:10.1046/j.1365-2389.2003.00544.x, 2003.
- 1233 Kaiser, K. and Zech, W.: Sorption of dissolved organic nitrogen by acid subsoil horizons and individual  
1234 mineral phases, *European Journal of Soil Science*, 51(3), 403–411, 2000.
- 1235 Kaiser, K., Mikutta, R. and Guggenberger, G.: Increased stability of organic matter sorbed to ferrihydrite  
1236 and goethite on aging, *Soil Science Society of America Journal*, 71(3), 711–719, 2007.

- 1237 Kalbitz, K. and Kaiser, K.: Contribution of dissolved organic matter to carbon storage in forest mineral  
1238 soils, *Journal of Plant Nutrition and Soil Science*, 171(1), 52–60, 2008.
- 1239 Kitagawa, Y.: Goethite and hematite in some soils from the amazon region, *Soil Science and Plant  
1240 Nutrition*, 29(2), 209–217, 1983.
- 1241 Kleber, M., Mikutta, R., Torn, M. S. and Jahn, R.: Poorly crystalline mineral phases protect organic matter  
1242 in acid subsoil horizons, *European Journal of Soil Science*, 56(6), 717–725, 2005.
- 1243 Kleber, M., Eusterhues, K., Keiluweit, M., Mikutta, C., Mikutta, R. and Nico, P. S.: Mineral–organic  
1244 associations: formation, properties, and relevance in soil environments, in *Advances in agronomy*, vol. 130,  
1245 pp. 1–140, Elsevier., 2015.
- 1246 Lloyd, J. and Farquhar, G. D.: Effects of rising temperatures and [CO<sub>2</sub>] on the physiology of tropical forest  
1247 trees, *Philosophical Transactions of the Royal Society B: Biological Sciences*, 363(1498), 1811–1817,  
1248 doi:doi: 10.1098/rstb.2007.0032, 2008.
- 1249 Luizão, F. J. and Schubart, H. O. R.: Litter production and decomposition in a terra-firme forest of Central  
1250 Amazonia, *Experientia*, 43(3), 259–265, 1987.
- 1251 Lützw, M. v., Kögel-Knabner, I., Ekschmitt, K., Matzner, E., Guggenberger, G., Marschner, B. and Flessa,  
1252 H.: Stabilization of organic matter in temperate soils: mechanisms and their relevance under different soil  
1253 conditions – a review, *European Journal of Soil Science*, 57(4), 426–445, 2006.
- 1254 Lynch, J. M. and Bragg, E.: Microorganisms and soil aggregate stability, in *Advances in soil science*, pp.  
1255 133–171, Springer., 1985.
- 1256 Malhi, Y., Wood, D., Baker, T. R., Wright, J., Phillips, O. L., Cochrane, T., Meir, P., Chave, J., Almeida,  
1257 S., Arroyo, L., Higuchi, N., Killeen, T. J., Laurance, S. G., Laurance, W. F., Lewis, S. L., Monteagudo, A.,  
1258 Neill, D. A., Vargas, P. N., Pitman, N. C. A., Quesada, C. A., Salomao, R., Silva, J. N. M., Lezama, A. T.,  
1259 Terborgh, J., Martinez, R. V. and Vinceti, B.: The regional variation of aboveground live biomass in old-  
1260 growth Amazonian forests, *Global Change Biology*, 12, 1107–1138, doi:10.1111/j.1365-  
1261 2486.2006.01120.x, 2006.
- 1262 Marques, J. J., Teixeira, W. G., Schulze, D. G. and Curi, N.: Mineralogy of soils with unusually high  
1263 exchangeable Al from the western Amazon Region, *Clay Minerals*, 37(4), 651, 2002.
- 1264 Mikutta, R., Kleber, M. and Jahn, R.: Poorly crystalline minerals protect organic carbon in clay  
1265 subfractions from acid subsoil horizons, *Geoderma*, 128(1–2), 106–115, 2005.
- 1266 Mikutta, R., Mikutta, C., Kalbitz, K., Scheel, T., Kaiser, K. and Jahn, R.: Biodegradation of forest floor  
1267 organic matter bound to minerals via different binding mechanisms, *Geochimica et Cosmochimica Acta*,  
1268 71(10), 2569–2590, 2007.
- 1269 Mitchard, E. T. A., Feldpausch, T. R., Brienen, R. J. W., Lopez-Gonzalez, G., Monteagudo, A., Baker, T.  
1270 R., Lewis, S. L., Lloyd, J., Quesada, C. A., Gloor, M., ter Steege, H., Meir, P., Alvarez, E., Araujo-  
1271 Murakami, A., Aragao, L. E. O. C., Arroyo, L., Aymard, G., Banki, O., Bonal, D., Brown, S., Brown, F. I.,  
1272 Ceron, C. E., Moscoso, V. C., Chave, J., Comiskey, J. A., Cornejo, F., Medina, M. C., Da Costa, L., Costa,  
1273 F. R. C., Di Fiore, A., Domingues, T. F., Erwin, T. L., Frederickson, T., Higuchi, N., Coronado, E. N. H.,  
1274 Killeen, T. J., Laurance, W. F., Levis, C., Magnusson, W. E., Marimon, B. S., Marimon, B. H., Polo, I. M.,  
1275 Mishra, P., Nascimento, M. T., Neill, D., Vargas, M. P. N., Palacios, W. A., Parada, A., Molina, G. P.,  
1276 Pena-Claros, M., Pitman, N., Peres, C. A., Poorter, L., Prieto, A., Ramirez-Angulo, H., Correa, Z. R.,  
1277 Roopsind, A., Roucoux, K. H., Rudas, A., Salomao, R. P., Schiatti, J., Silveira, M., de Souza, P. F.,  
1278 Steininger, M. K., Stropp, J., Terborgh, J., Thomas, R., Toledo, M., Torres-Lezama, A., van Andel, T. R.,  
1279 van der Heijden, G. M. F., Vieira, I. C. G., Vieira, S., Vilanova-Torre, E., Vos, V. A., Wang, O., Zartman,

- 1280 C. E., Malhi, Y. and Phillips, O. L.: Markedly divergent estimates of Amazon forest carbon density from  
1281 ground plots and satellites, *Global Ecology and Biogeography*, 23(8), 935–946, doi:DOI  
1282 10.1111/geb.12168, 2014.
- 1283 Nelson, D. W. and Sommers, L. E.: Total carbon and total nitrogen, in *Methods of Soil Analysis: Part 3—*  
1284 *Chemical Methods*, edited by D. L. Sparks, pp. 961–1010, American Society of Agronomy/Soil Science  
1285 Society of America, Madison, WI., 1996.
- 1286 Nierop, K. G., Jansen, B. and Verstraten, J. M.: Dissolved organic matter, aluminium and iron interactions:  
1287 precipitation induced by metal/carbon ratio, pH and competition, *Science of the Total Environment*, 300(1–  
1288 3), 201–211, 2002.
- 1289 Oades, J. M.: An introduction to organic matter in mineral soils, *Minerals in soil environments,*  
1290 *(mineralsinsoile)*, 89–159, 1989.
- 1291 Oades, J. M.: The role of biology in the formation, stabilization and degradation of soil structure, in *Soil*  
1292 *Structure/Soil Biota Interrelationships*, pp. 377–400, Elsevier., 1993.
- 1293 Parfitt, R. L. and Childs, C. W.: Estimation of forms of Fe and Al a review, and analysis of contrasting  
1294 soils by dissolution and Mossbauer methods, *Soil Research*, 26(1), 121–144, 1988.
- 1295 Parfitt, R. L., Theng, B. K. G., Whitton, J. S. and Shepherd, T. G.: Effects of clay minerals and land use on  
1296 organic matter pools, *Geoderma*, 75(1–2), 1–12, 1997.
- 1297 Paul, S., Flessa, H., Veldkamp, E. and López-Ulloa, M.: Stabilization of recent soil carbon in the humid  
1298 tropics following land use changes: evidence from aggregate fractionation and stable isotope analyses,  
1299 *Biogeochemistry*, 87(3), 247–263, 2008.
- 1300 Paz, C. P.: Distribuição das frações do carbono orgânico nos solos de florestas maduras na bacia  
1301 Amazônica: o papel das propriedades do solo, da qualidade da liteira e do clima, 2011.
- 1302 Pella, E.: Elemental organic analysis, Part 2, State of the art, *American Laboratory*, 22, 28–32, 1990.
- 1303 Pereival, H. J., Parfitt, R. L. and Scott, N. A.: Factors controlling soil carbon levels in New Zealand  
1304 grasslands is clay content important?, *Soil Science Society of America Journal*, 64(5), 1623–1630, 2000.
- 1305 Pleysier, J. L. and Juo, A. S. R.: A single extraction method using silver thiourea for measuring  
1306 exchangeable cations and effective CEC in soils with variable charges, *Soil Science*, 129, 205–211, 1980.
- 1307 Post, W. M., Emanuel, W. R., Zinke, P. J. and Stangenberger, A. G.: Soil carbon pools and world life  
1308 zones, *Nature*, 298(5870), 156, 1982.
- 1309 Quesada, C. A. and Lloyd, J.: Soil–Vegetation Interactions in Amazonia, in *Interactions Between*  
1310 *Biosphere, Atmosphere and Human Land Use in the Amazon Basin*, edited by L. Nagy, B. R. Forsberg, and  
1311 P. Artaxo, pp. 267–299, Springer Berlin Heidelberg, Berlin, Heidelberg., 2016.
- 1312 Quesada, C. A., Lloyd, J., Schwarz, M., Patiño, S., Baker, T. R., Czimezik, C., Fyllas, N. M., Martinelli, L.,  
1313 Nardoto, G. B., Schmerler, J., Santos, A. J. B., Hodnett, M. G., Herrera, R., Luizão, F. J., Arneith, A.,  
1314 Lloyd, G., Dezzeo, N., Hilke, I., Kuhlmann, I., Raessler, M., Brand, W. A., Geilmann, H., Moraes Filho, J.  
1315 O., Carvalho, F. P., Araujo Filho, R. N., Chaves, J. E., Cruz Junior, O. F., Pimentel, T. P. and Paiva, R.:  
1316 Variations in chemical and physical properties of Amazon forest soils in relation to their genesis,  
1317 *Biogeosciences*, 7(5), 1515–1541, doi:doi: 10.5194/bg-7-1515-2010, 2010.

- 1318 Quesada, C. A., Lloyd, J., Anderson, L. O., Fyllas, N. M., Schwarz, M. and Czimczik, C. I.: Soils of  
1319 Amazonia with particular reference to the RAINFOR sites, *Biogeosciences*, 8((6)), 1415–1440, doi:doi:  
1320 10.5194/bg-8-1415-2011, 2011.
- 1321 Quesada, C. A. N.: Soil-vegetation interactions across Amazonia, University of Leeds (School of  
1322 Geography), 2008.
- 1323 R-Development Core Team: R: A Language and Environment for Statistical Computing, edited by Austria,  
1324 R Foundation for Statistical Computing Vienna Austria, 0(01/19), {ISBN} 3-900051-07-0, 2012.
- 1325 Richter, D. D. and Babbar, L. I.: Soil diversity in the tropics, in *Advances in ecological research*, vol. 21,  
1326 pp. 315–389, Elsevier., 1991.
- 1327 Sagar, S., Parshotam, A., Sparling, G. P., Feltham, C. W. and Hart, P. B. S.: 14C labelled ryegrass  
1328 turnover and residence times in soils varying in clay content and mineralogy, *Soil Biology and*  
1329 *Biochemistry*, 28(12), 1677–1686, 1996.
- 1330 Sagar, S., Parshotam, A., Hedley, C. and Salt, G.: 14C-labelled glucose turnover in New Zealand soils,  
1331 *Soil Biology and Biochemistry*, 31(14), 2025–2037, 1999.
- 1332 Saïdy, A. R., Smernik, R. J., Baldock, J. A., Kaiser, K., Sanderman, J. and Macdonald, L. M.: Effects of  
1333 clay mineralogy and hydrous iron oxides on labile organic carbon stabilisation, *Geoderma*, 173, 104–110,  
1334 2012.
- 1335 Saiz, G., Bird, M., Domingues, T., Schrod, F., Schwarz, M., Feldpausch, T., Veenendaal, E., Djagbletey,  
1336 G., Hien, F., Compaore, H., Diallo, A. and Lloyd, J.: Variation in soil carbon stocks and their determinants  
1337 across a precipitation gradient in West Africa. *Global Change Biology*, 18, 1670–1683, 2012.
- 1338 Saiz, G., Bird, M., Wurster, C., Quesada, C. A., Ascough, P., Domingues, T., Schrod, F., Schwarz, M.,  
1339 Feldpausch, T.R., Veenendaal, E.M., Djagbletey, G., Jacobsen, G., Hien, F., Compaore, H., Diallo, A. and  
1340 Lloyd, J.: The influence of C<sub>3</sub> and C<sub>4</sub> vegetation on soil organic matter dynamics in contrasting semi-  
1341 natural tropical ecosystems. *Biogeosciences* 12, 5041–5059. 2015.
- 1342 Sanchez, P. A.: *Properties and Management of Soils in the Tropics*, Wiley, New York., 1976.
- 1343 Scheel, T., Dörfler, C. and Kalbitz, K.: Precipitation of dissolved organic matter by aluminum stabilizes  
1344 carbon in acidic forest soils, *Soil Science Society of America Journal*, 71(1), 64–74, 2007.
- 1345 Scheel, T., Haumaier, L., Ellerbrock, R. H., Rühlmann, J. and Kalbitz, K.: Properties of organic matter  
1346 precipitated from acidic forest soil solutions, *Organic geochemistry*, 39(10), 1439–1453, 2008.
- 1347 Schrumpf, M., Kaiser, K., Guggenberger, G., Persson, T., Kögel Knabner, I. and Schulze, E. D.: Storage  
1348 and stability of organic carbon in soils as related to depth, occlusion within aggregates, and attachment to  
1349 minerals, *Biogeosciences*, 10, 1675–1691, 2013.
- 1350 Schwertmann, U., Wagner, F. and Knieker, H.: Ferrihydrite-humic associations, *Soil Science Society of*  
1351 *America Journal*, 69(4), 1009–1015, 2005.
- 1352 Siegel, S. and Castellan Jr., N.: *Nonparametric statistics for the behavioural sciences*, 2nd ed., McGraw-  
1353 Hill, Boston., 1998.
- 1354 Sioli, H.: The Amazon and its main affluents: hydrography, morphology of the river courses, and river  
1355 types, in *The Amazon*, pp. 127–165, Springer., 1984.

- 1356 Six, J., Bossuyt, H., Degryze, S., and Denef, K.: A history of research on the link between (micro)  
1357 aggregates, soil biota, and soil organic matter dynamics, *Soil Tillage Research*, 79, 7–31, 2004.
- 1358 Sollins, P., Homann, P. and Caldwell, B. A.: Stabilization and destabilization of soil organic matter:  
1359 mechanisms and controls, *Geoderma*, 74(1–2), 65–105, 1996.
- 1360 Sombroek, W. G.: A Reconnaissance of the Soils of the Brazilian Amazon Region, Centre for Agricultural  
1361 Publications and Documentation, Wageningen., 1966.
- 1362 Sombroek, W. G.: Soils of the Amazon region, in *The Amazon*, pp. 521–535, Springer., 1984.
- 1363 Sombroek, W. G.: Amazon landforms and soils in relation to biological diversity, *Acta Amazonica*, 30(1),  
1364 81–100, 2000.
- 1365 Telles, E. de C. C., de Camargo, P. B., Martinelli, L. A., Trumbore, S. E., da Costa, E. S., Santos, J.,  
1366 Higuchi, N. and Oliveira Jr, R. C.: Influence of soil texture on carbon dynamics and storage potential in  
1367 tropical forest soils of Amazonia, *Global Biogeochemical Cycles*, 17(2), 2003.
- 1368 Tiessen, H. and Moir, J. O.: Total and Organic Carbon, in *Soil Sampling and Methods of Analysis*, edited  
1369 by M. R. Carter, pp. 187–199, Lewis Publishers, Boca Raton, FL., 1993.
- 1370 Tisdall, J. M. and Oades, J.: Organic matter and water stable aggregates in soils, *Journal of soil science*,  
1371 33(2), 141–163, 1982.
- 1372 Trumbore, S. and Barbosa De Camargo, P.: Soil carbon dynamics, *Amazonia and global change*, 186, 451–  
1373 462, 2009.
- 1374 Trumbore, S. E. and Zheng, S.: Comparison of fractionation methods for soil organic matter 14 C analysis,  
1375 *Radiocarbon*, 38(2), 219–229, 1996.
- 1376 Van Reeuwijk, L. P.: Procedures for soil analysis, 6th ed., International Soil Reference Information Centre,  
1377 ISRIC, Wageningen, the Netherlands., 2002.
- 1378 Van Soest, P. J.: Use of detergents in the analysis of fibrous feeds. 2. A rapid method for the determination  
1379 of fiber and lignin., *Journal of the Association of Official Agricultural Chemists*, 46, 829–835, 1963.
- 1380 Van Veen, J. A. and Kuikman, P. J.: Soil structural aspects of decomposition of organic matter by micro-  
1381 organisms, *Biogeochemistry*, 11(3), 213–233, 1990.
- 1382 Wagai, R. and Mayer, L. M.: Sorptive stabilization of organic matter in soils by hydrous iron oxides,  
1383 *Geochimica et Cosmochimica Acta*, 71(1), 25–35, 2007.
- 1384 West, L. T., Beinroth, F. H., Sumner, M. E. and Kang, B. T.: Ultisols: Characteristics and impacts on  
1385 society, in *Advances in Agronomy*, vol. 63, pp. 179–236, Elsevier., 1997.
- 1386 Wiseman, C. L. S. and Püttmann, W.: Interactions between mineral phases in the preservation of soil  
1387 organic matter, *Geoderma*, 134(1–2), 109–118, 2006.
- 1388 Wurster, C. M., Saiz, G., Calder, A., and Bird, M. I.: Recovery of organic matter from mineral rich  
1389 sediment and soils for stable isotope analyses using static dense media, *Rapid Communications in Mass  
1390 Spectrometry*, 24, 165–168, 2010.
- 1391 Zimmermann, M., Leifeld, J., Schmidt, M. W. I., Smith, P. and Fuhrer, J.: Measured soil organic matter  
1392 fractions can be related to pools in the RothC model, *European Journal of Soil Science*, 58(3), 658–667,  
1393 2007.





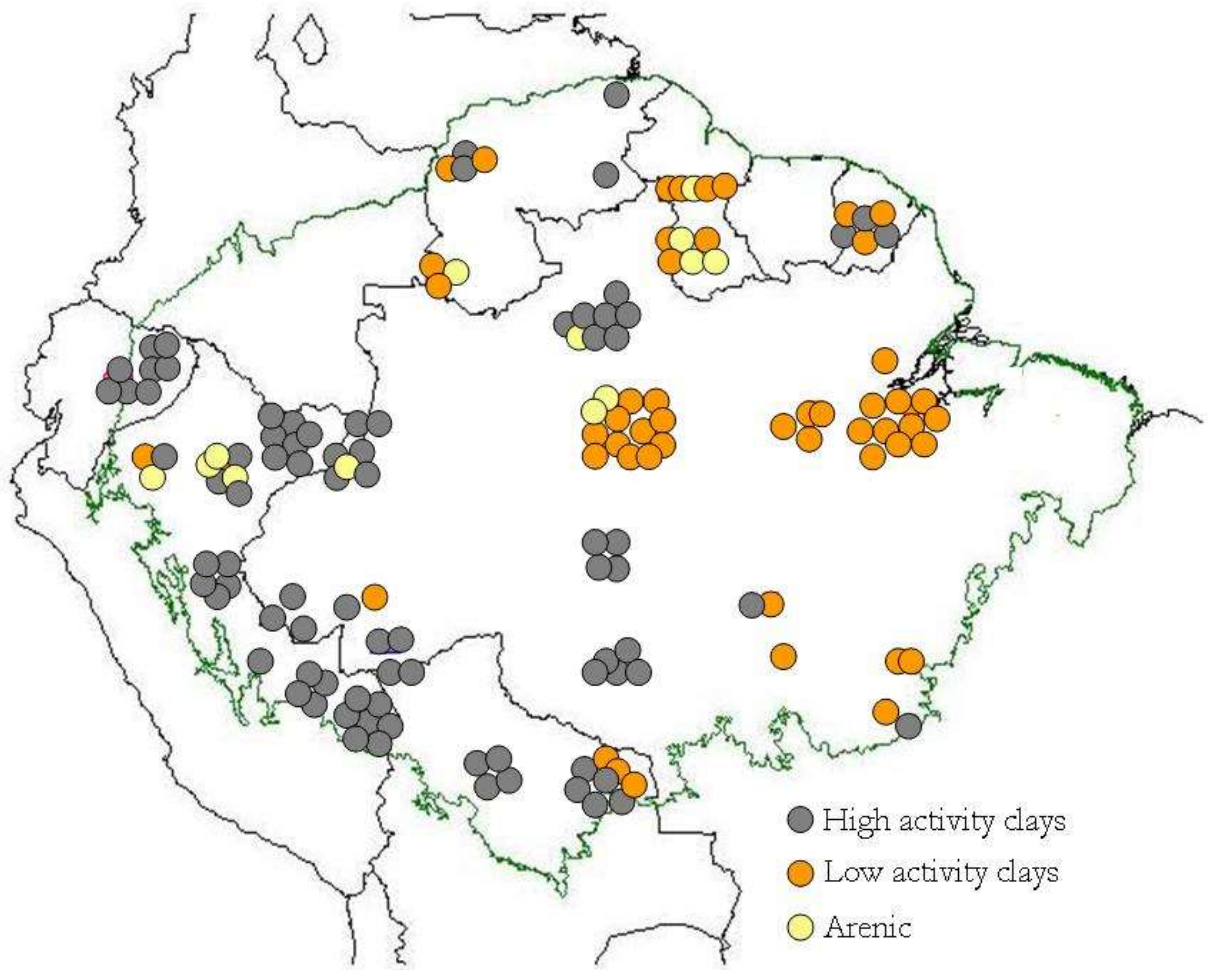

1396

1397

1398 **Fig. 1.**– Geographic distribution of 147 study sites across the Amazon Basin, according to the  
1399 different soil groups. Each point is a 1 ha forest inventory permanent plot. Geographical locations  
1400 have been manipulated in the map to allow visualization of site clusters at this scale.

1401

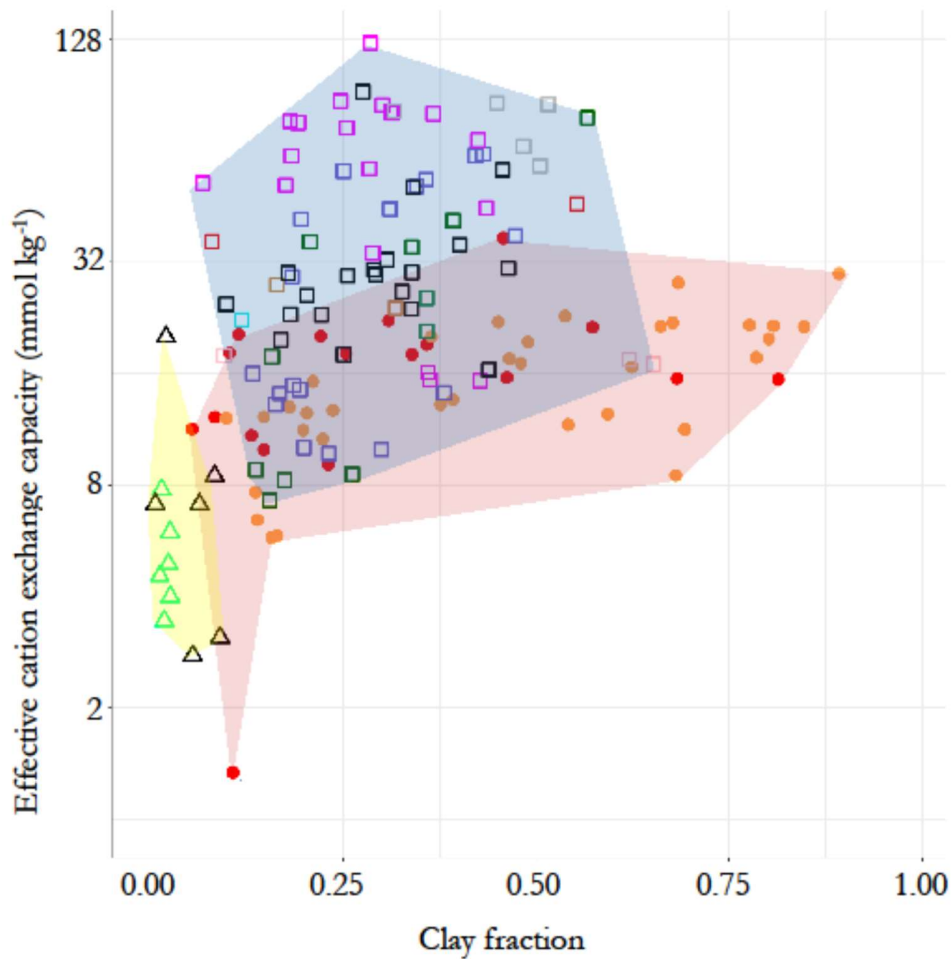

1402

1403 **Fig. 2. Contrasting chemical characteristics of the three soil groups, evidenced by the relationship**  
 1404 **between top soil clay fraction and effective cation exchange capacity (0-30 cm). Triangles with yellow**  
 1405 **background represent the Arenic soil group, consisting of Arenosols (green) and Podzols (black).**  
 1406 **Filled circles with pink background represent the low activity clay soils (LAC) which consists of**  
 1407 **Ferralsols (yellow) and Acrisols (red). Soils having high activity clay (HAC) are show as open squares**  
 1408 **with light blue background. They are the Alisol (black), Cambisol (pink), Fluvisol (grey), Gleysol**  
 1409 **(green), Leptosol (brown), Lixisol (red), Luvisol (purple), Plinthosol (blue), Regosol (cyan) and**  
 1410 **Umbrisol (light green) soil groups.**

1411

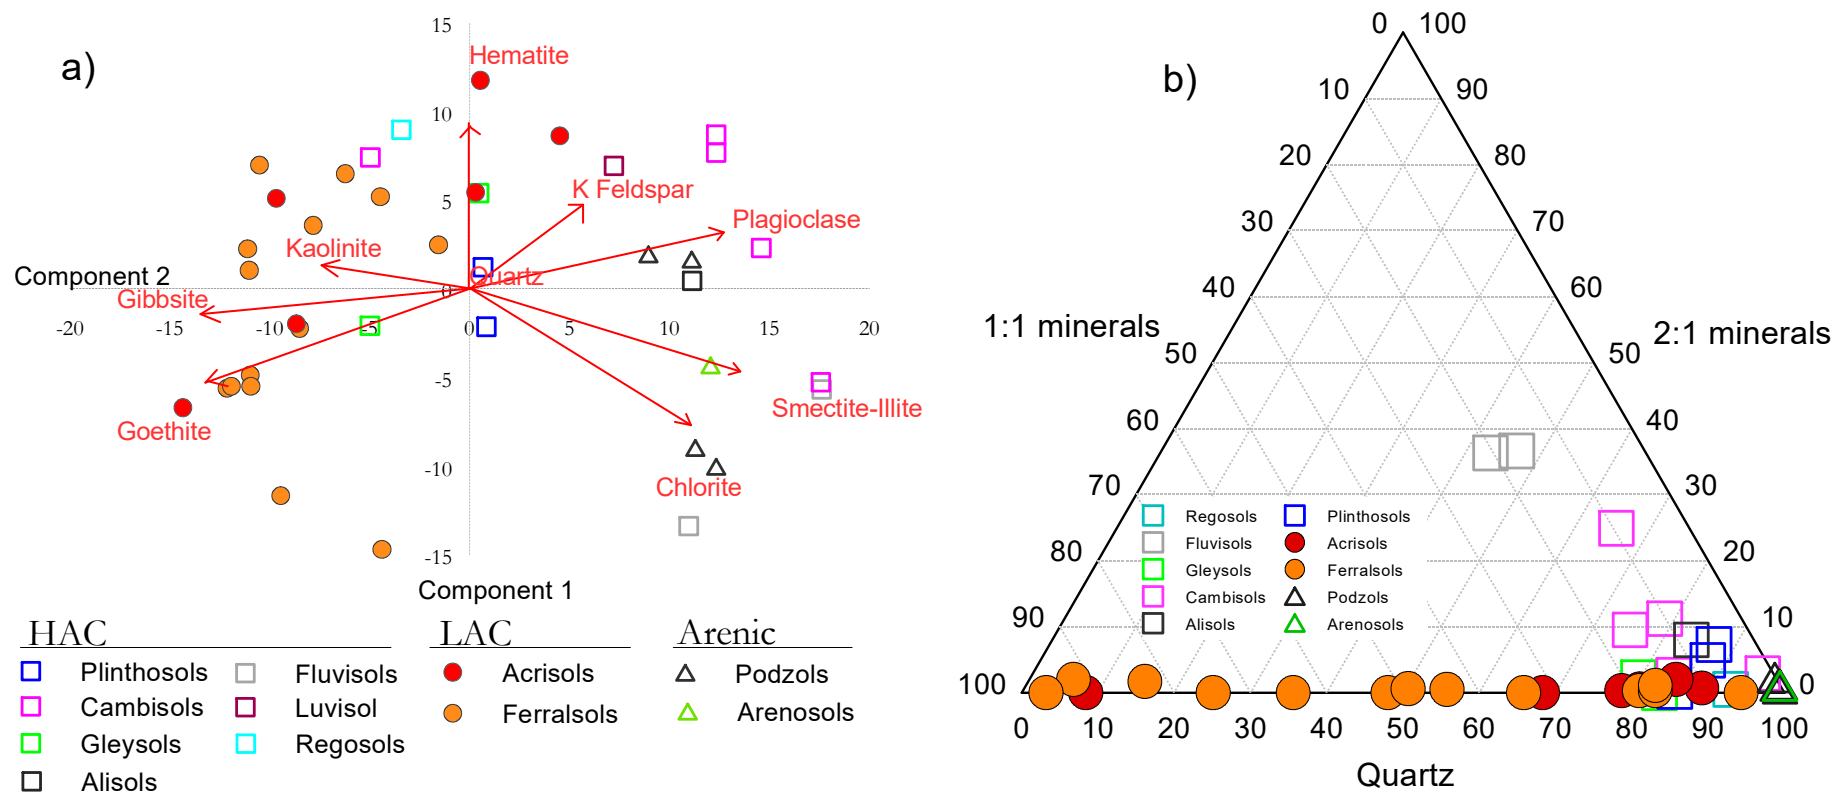

**Fig. 3** Contrasting mineralogical characteristics of the different soils in this study. **a)** Principal Components Analysis (PCA) ordination on semi-quantitative X-ray Diffraction Spectroscopy (XRD) data. **b)** Compositional plot showing contrasting relationships between the 1:1 and 2:1 minerals considered along with variations in quartz content.

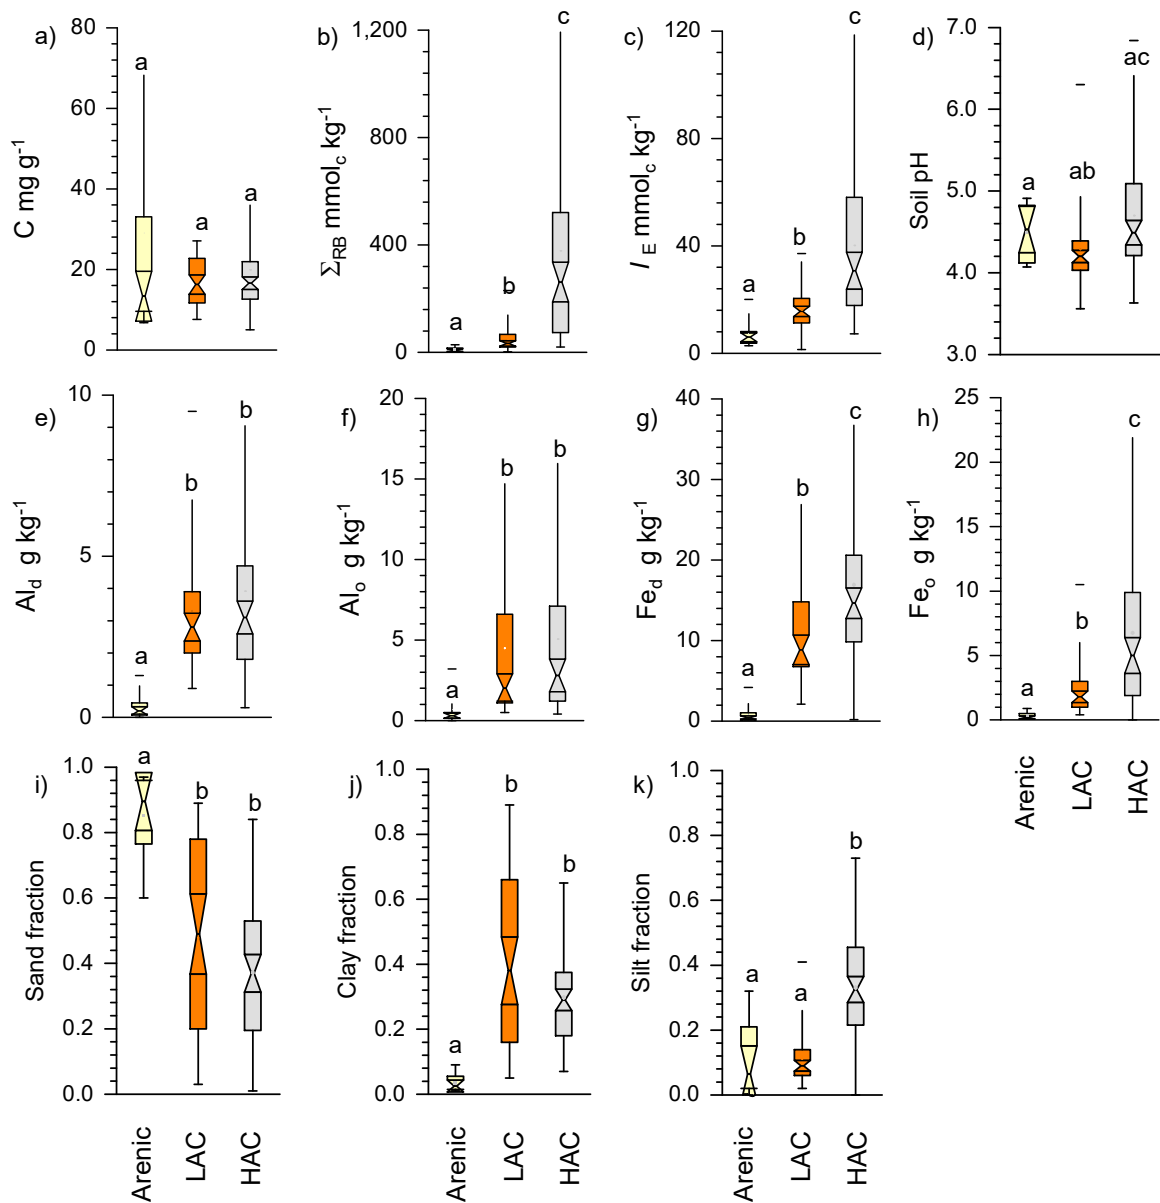

5 **Fig. 4.** Contrasts between the three soil clusters for selected variables. Statistical differences are given through the non-parametric Kruskal-Wallis test. **a) SOC concentration, b) total reserve bases, c) effective cation exchange capacity, d) soil pH, e) dithionite-citrate extractable Al, f) Al<sub>o</sub> oxalate extractable Al, g) Fe<sub>d</sub> dithionite-citrate extractable Fe, h) oxalate extractable Fe, i) sand fraction, j) clay fraction and k) silt fraction.**

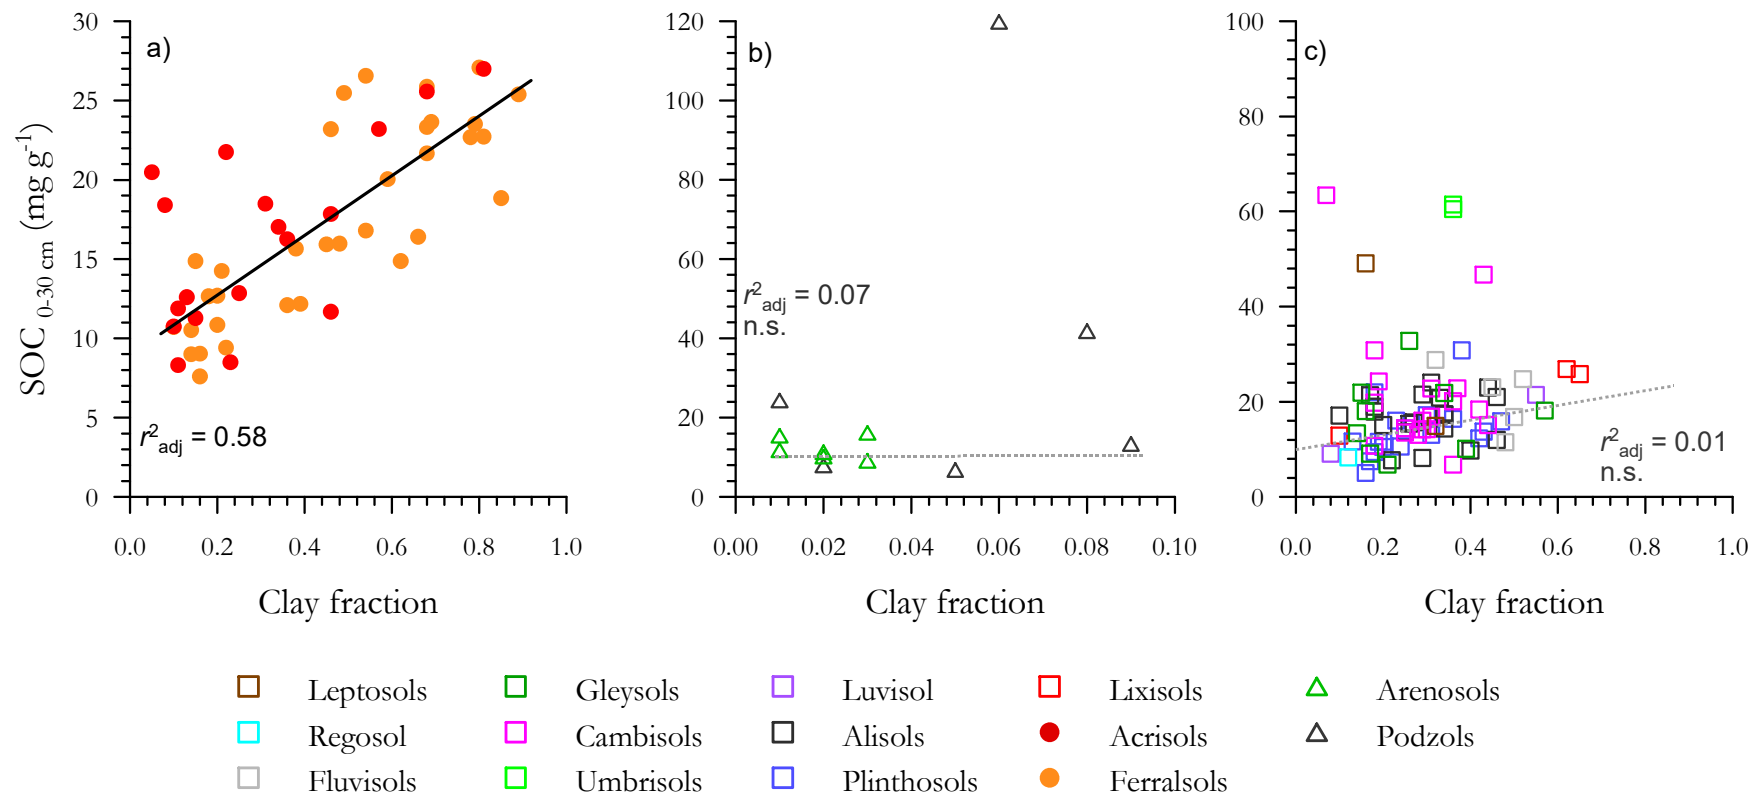

5 **Fig. 5. Associations between soil organic C and clay fraction for the three soil groups. a) low activity clay (LAC), b) arenic and c) soils containing high activity clays (HAC). Only LAC shows a significant regression. Non-significant regressions in arenic and HAC soils are shown as dotted lines.**

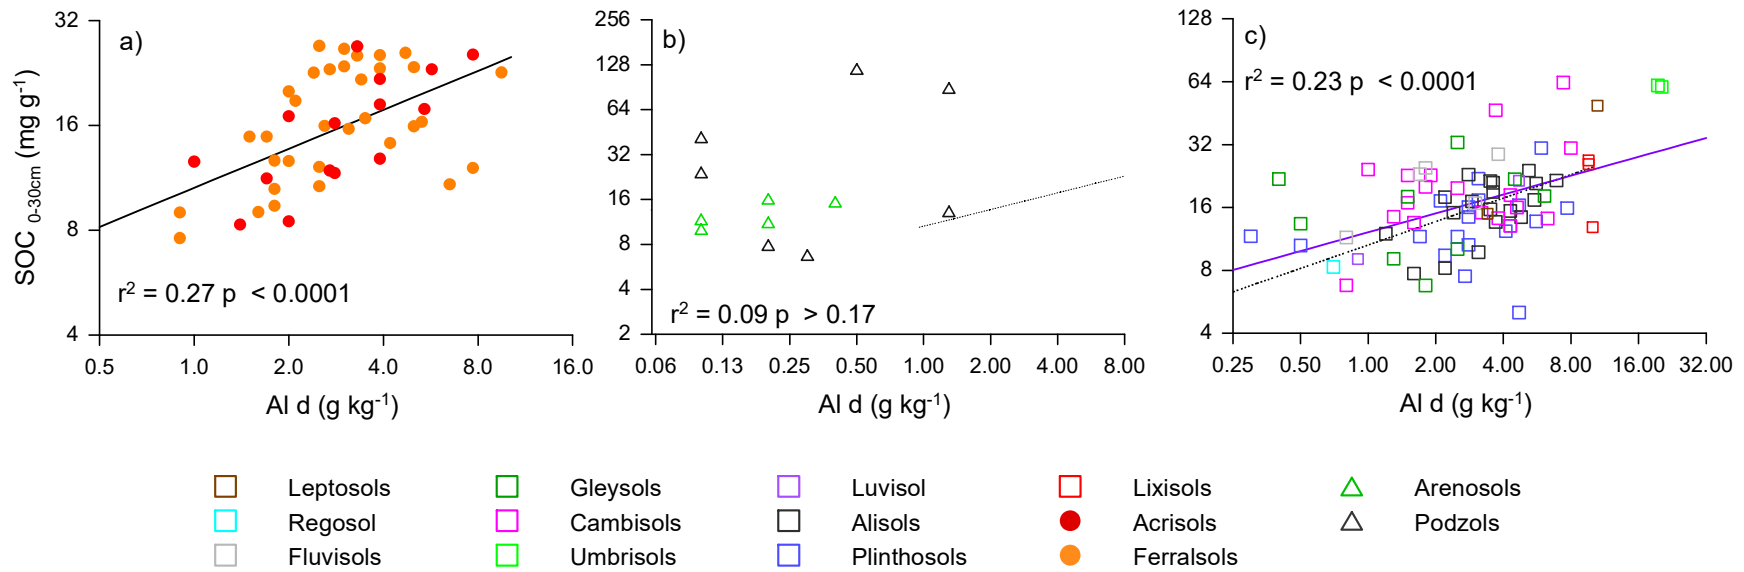

Figure 6. The association between soil organic C and dithionite extractable Al (Al d) for the studied soils. The regression line for LAC soils (Fig. 6a) is repeated as a dotted line in Fig.6b (Arenic) and 6c (HAC) for comparison.

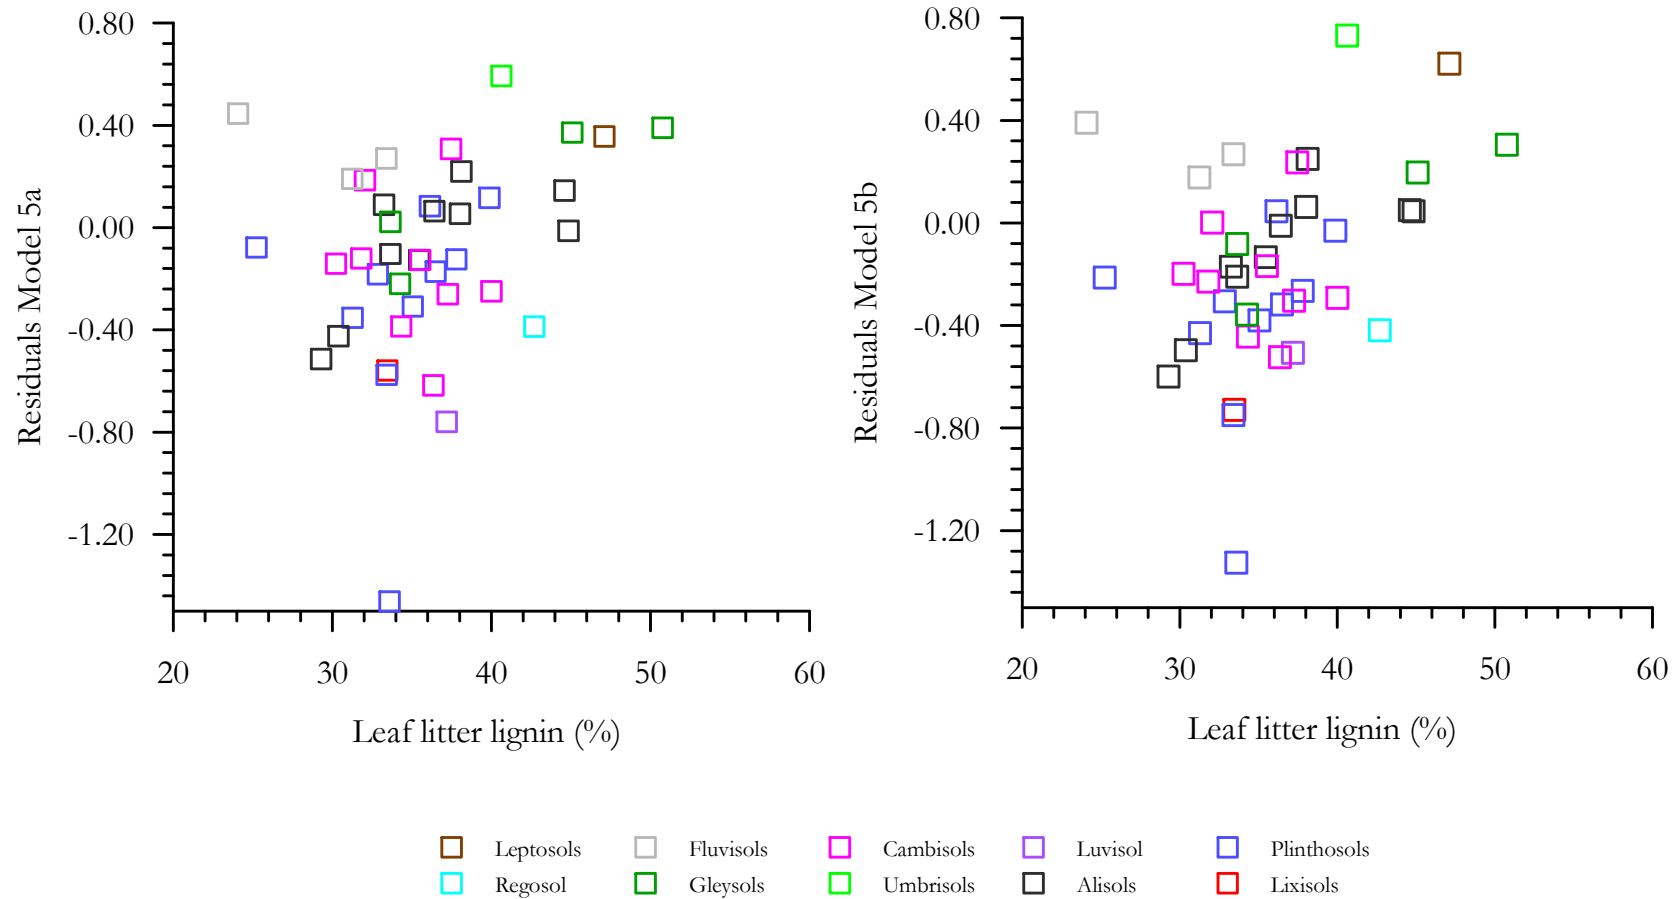

**Fig. 7.** The effect of litter lignin content, a surrogate for the abundance of aromatic C compounds, on the residuals of model regressions 6q (Table 6; Fig. 7a) and a simplified additional model with only pH and Al d included (Fig. 7b).



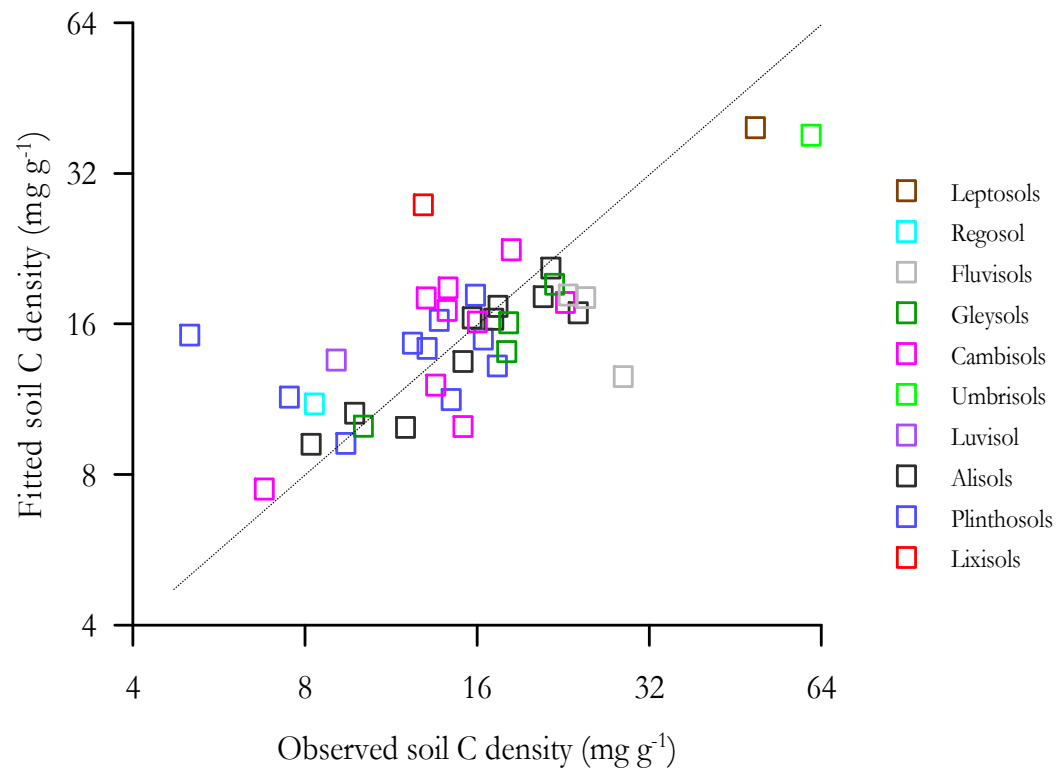

**Fig. 8. Fitted vs observed SOC densities for regression model 7v (Table 7).**

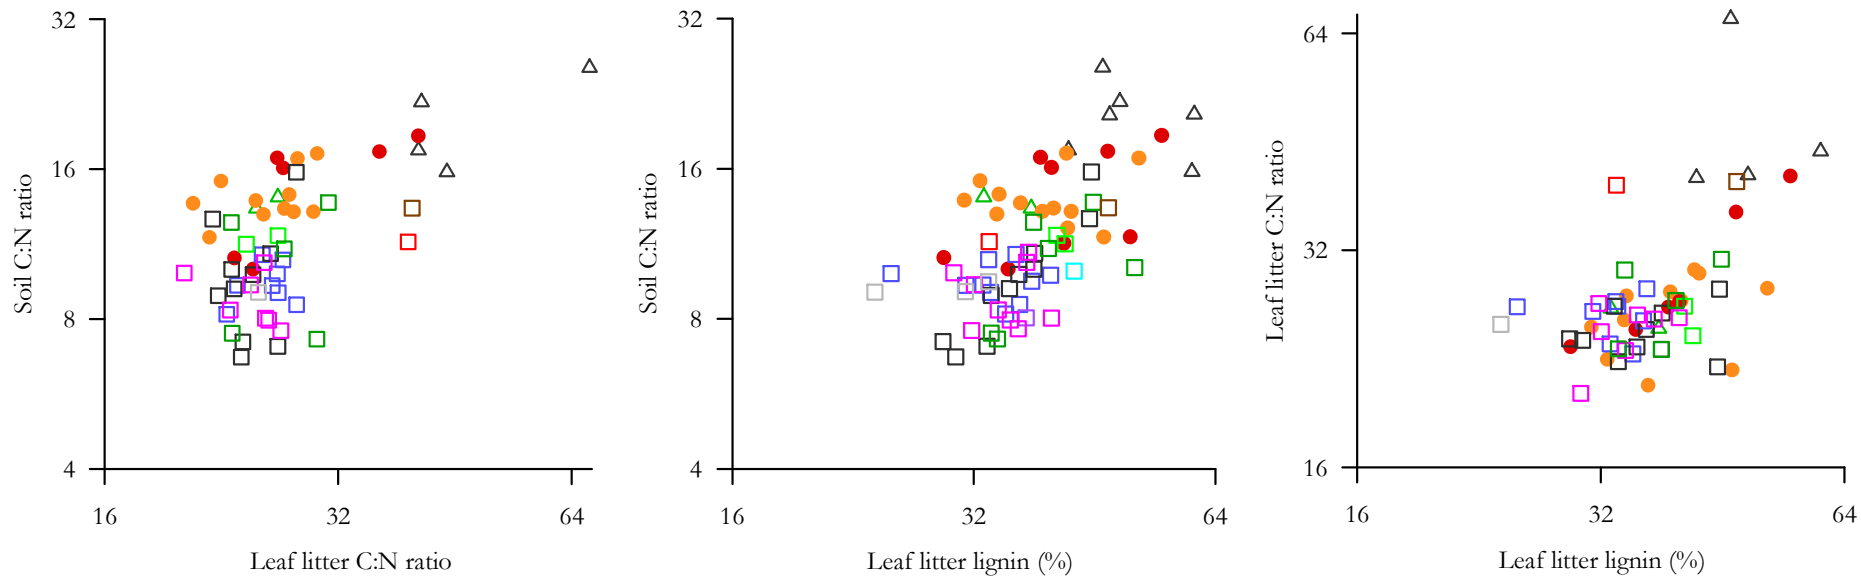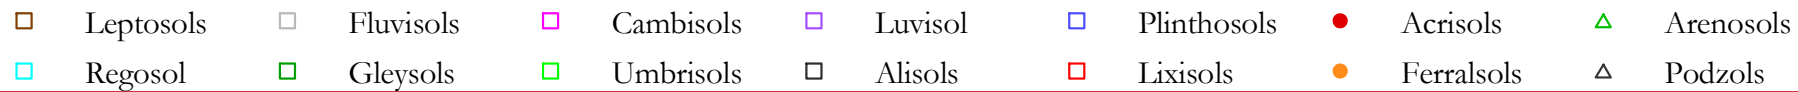

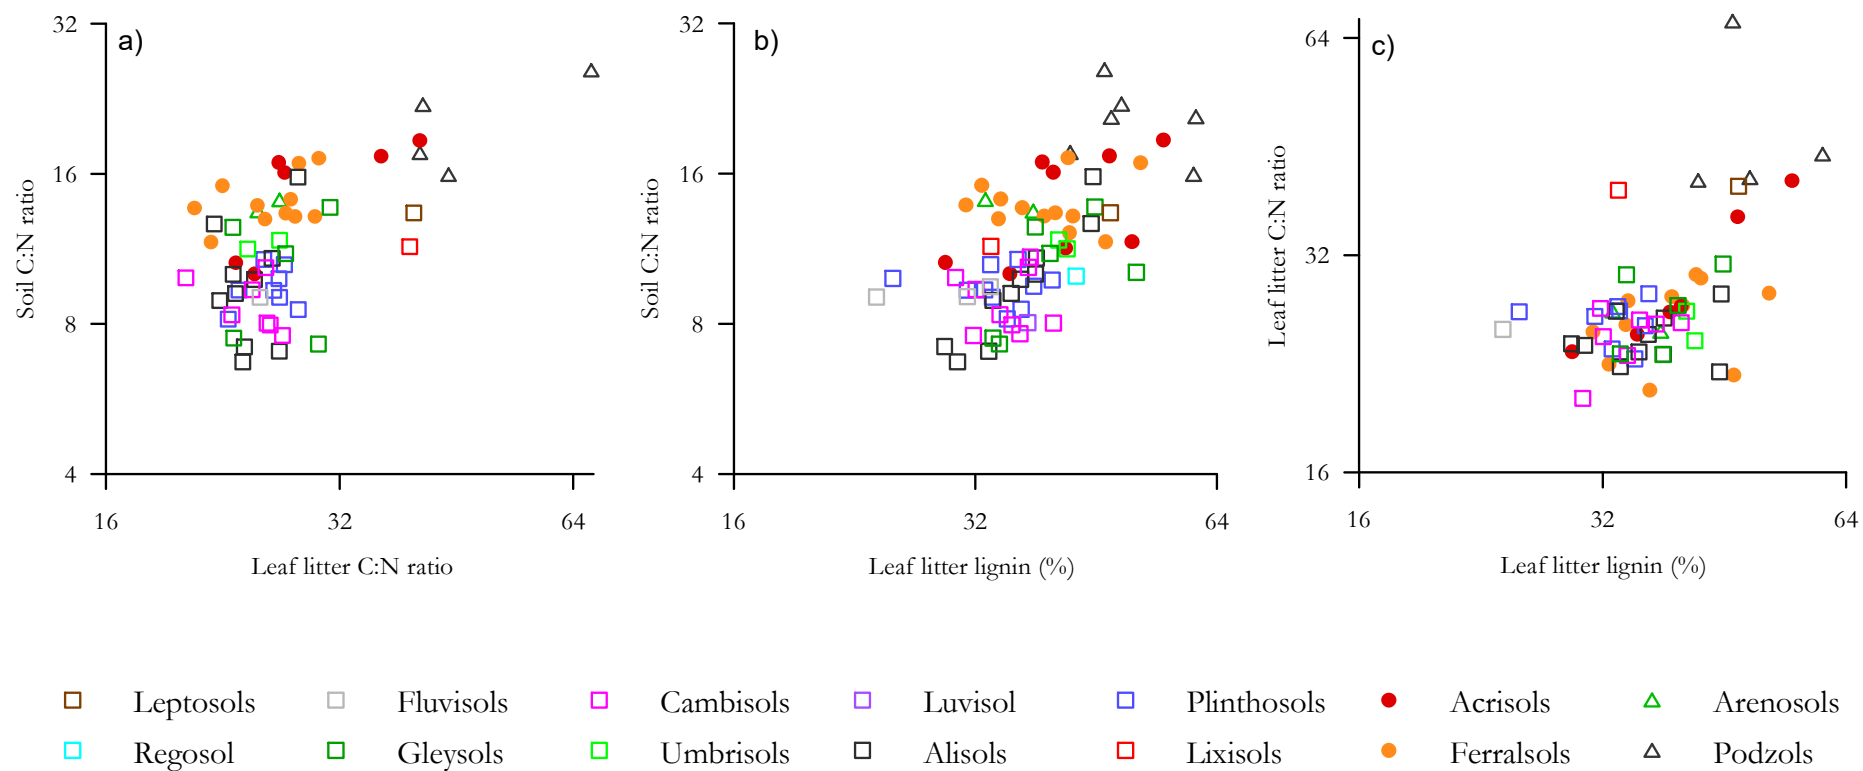

**Fig. 9.** The relationship of leaf litter lignin content with both leaf litter and soil C:N ratios. a) soil C:N ratio as a function of leaf litter C:N ratio. b) soil C:N ratio as a function of leaf litter lignin concentration and c) leaf litter C:N ratio as a function of leaf litter lignin.

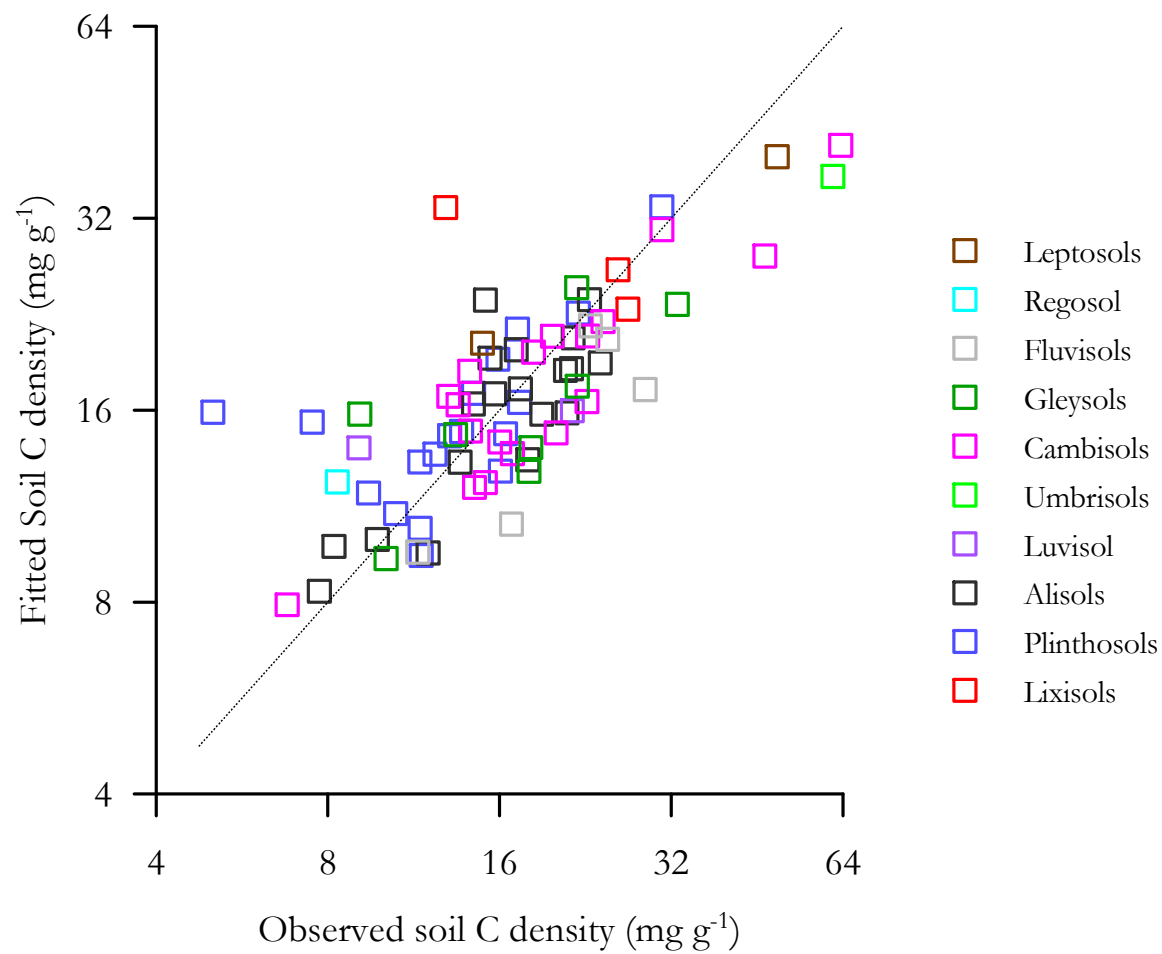

**Fig 10. Fitted vs observed SOC densities for regression model 6s (Table 6).**



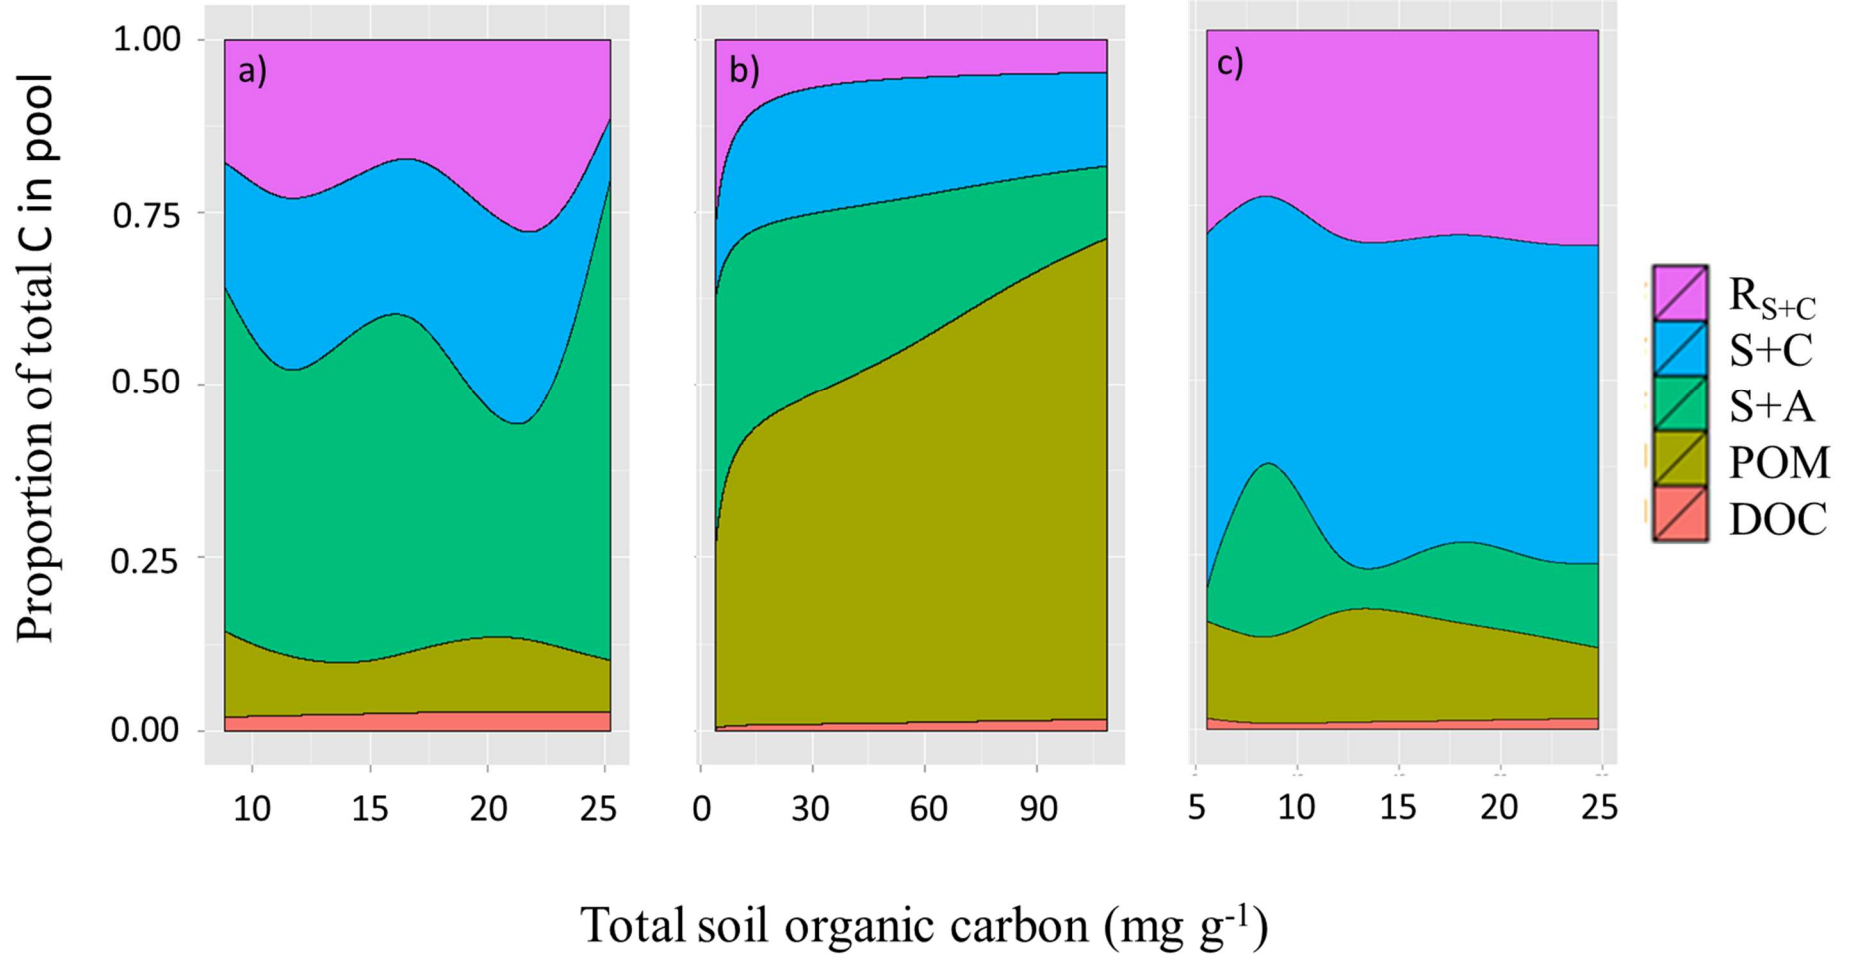

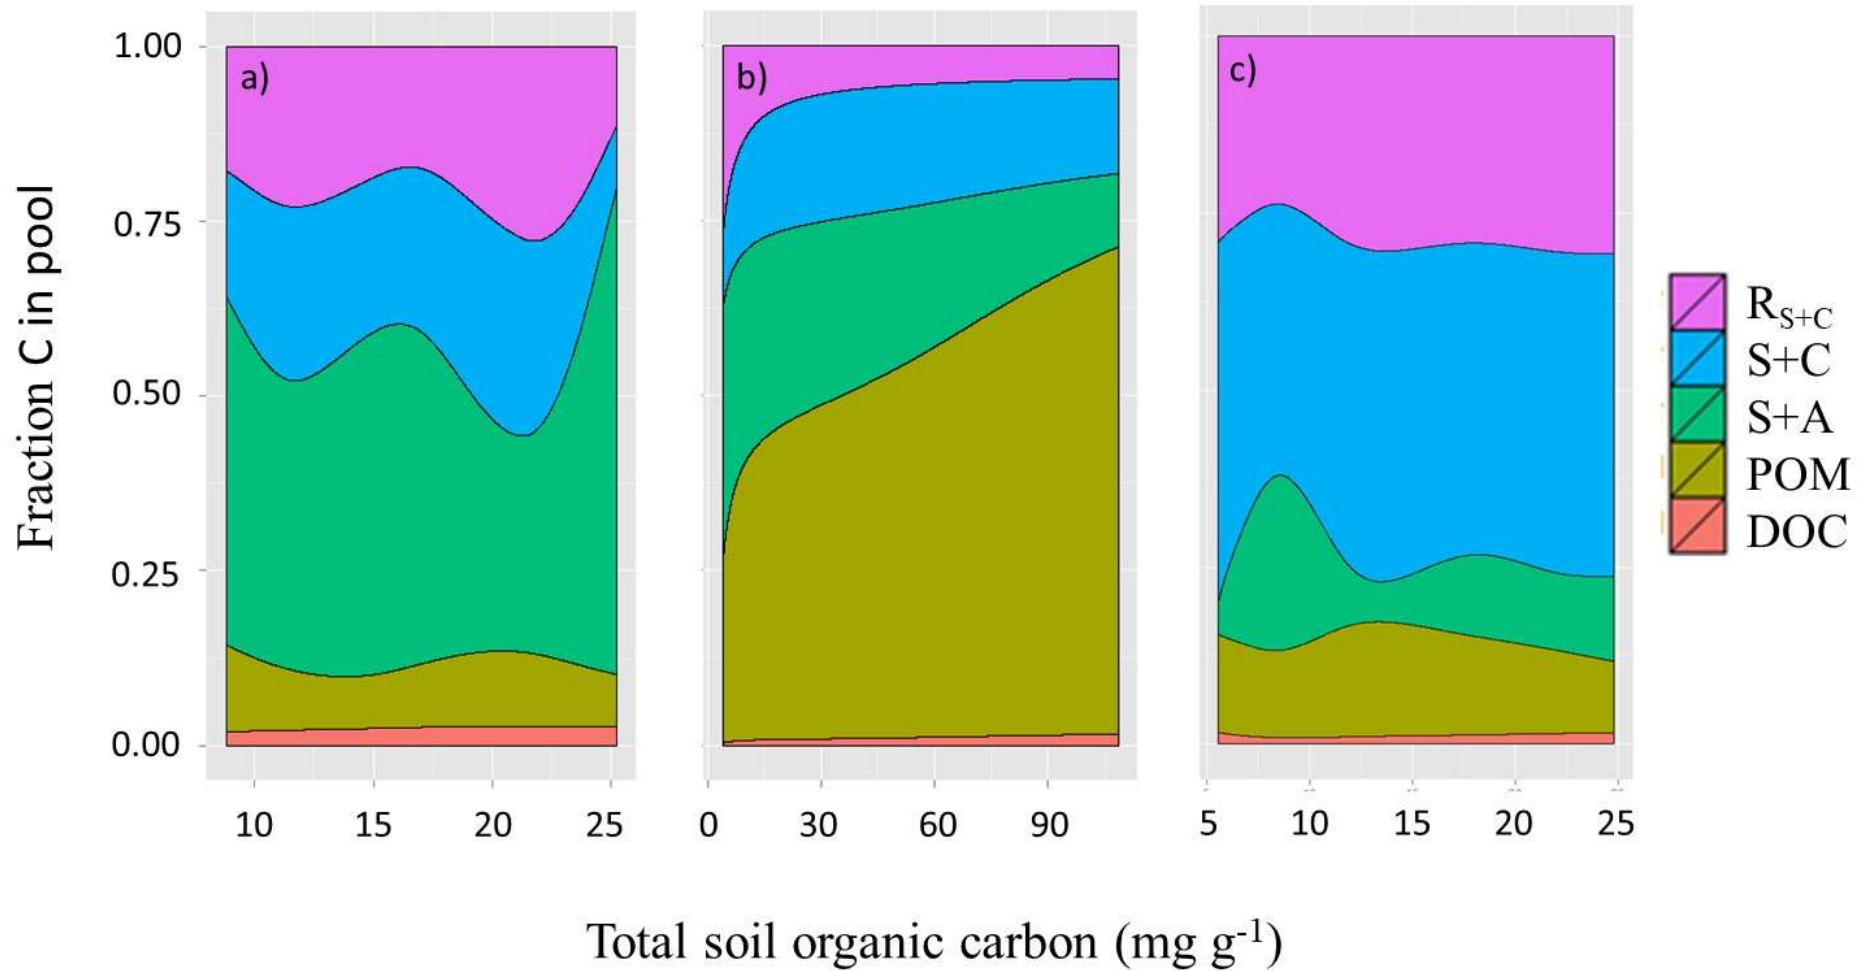

Figure 11. **Fraction-Proportion** of **total** soil carbon in the different pools for the three soil groups **varying as a function of their SOC content**. a) LAC soils, b) arenic and c) HAC. Dissolved organic carbon (DOC), particulate organic matter (POM), sand and aggregates (S+A), silt and clay (S+C) and resistant SOC associated to silt and clay fractions.

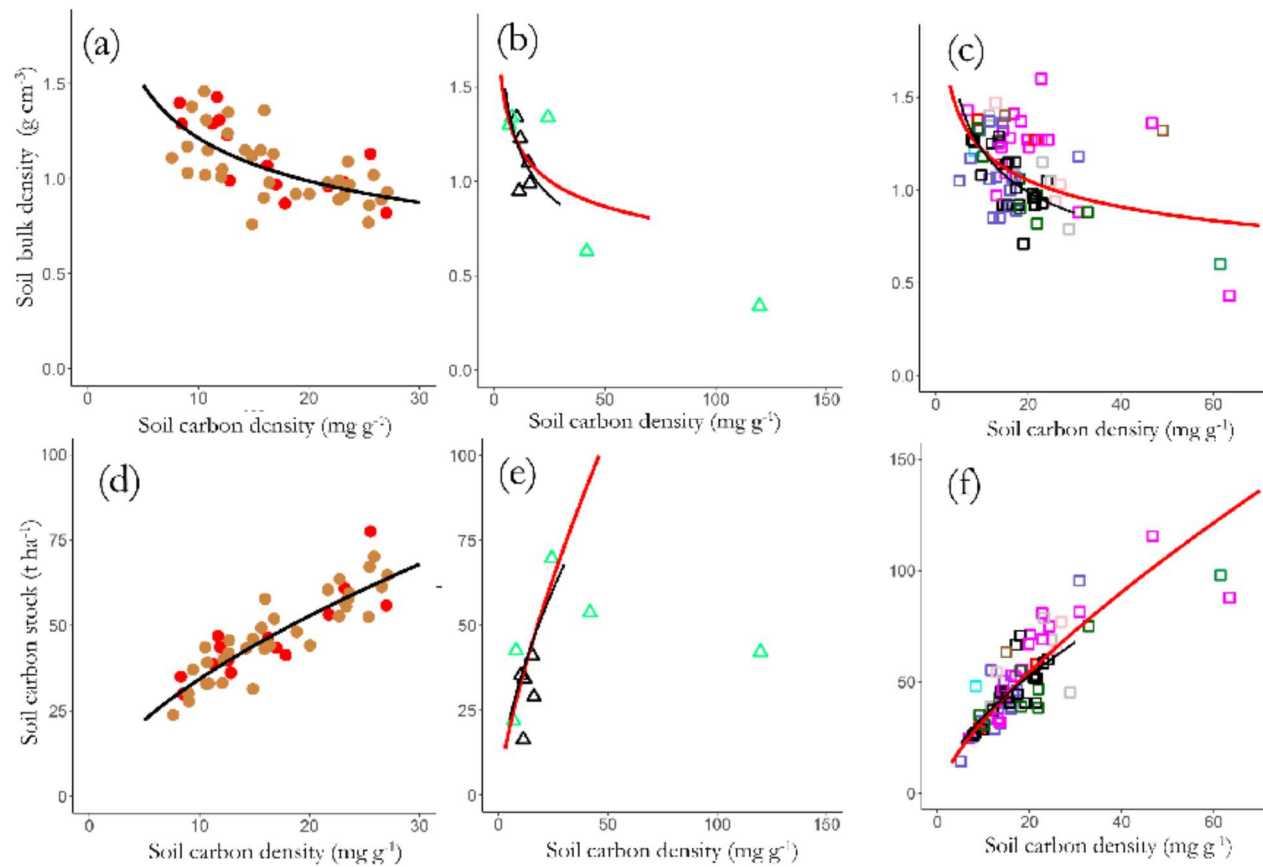

**Figure 12. Variations in bulk density (a) LAC; (b) HAC and (c) arenic; and top soil SOC stocks (d) LAC; (e) HAC and (f) arenic as a function of SOC content. Significant regression lines (see text for details) for each soil group are plotted together for comparison.**



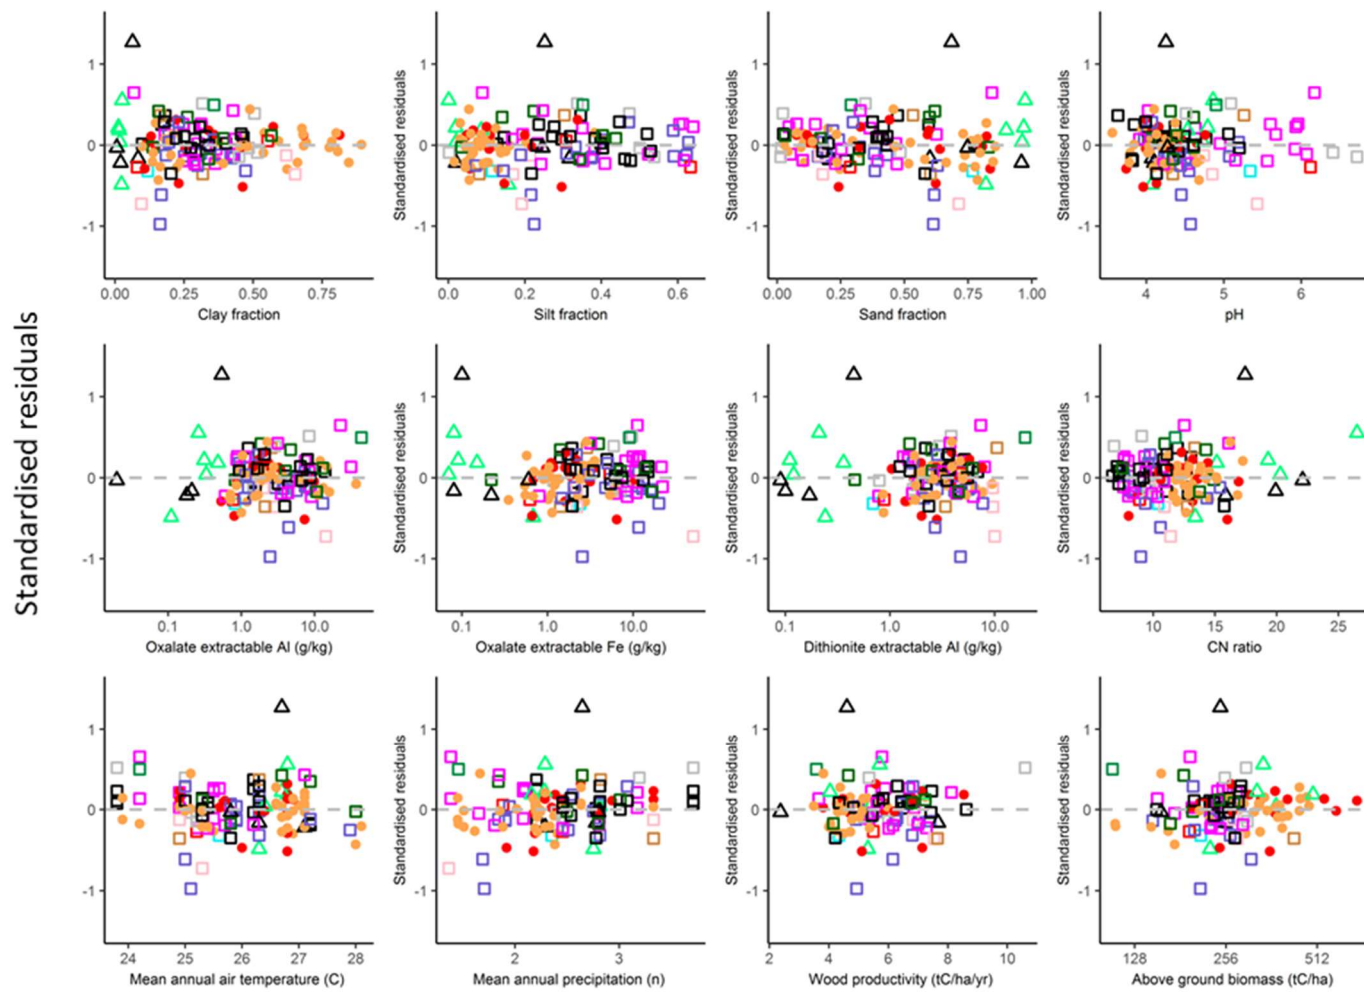

Figure A1. Standardized regression model residuals plotted against selected climatic, edaphic and vegetation variables.

**Table 1. Climate/site details and summary of soil physical and chemical characteristics (0.0-0.3m). Abbreviations used:  $T_A$  – mean annual temperature;  $P_A$  – mean annual precipitation;  $E_V$  – elevation;  $\Sigma_B$  – sum of bases,  $I_E$  – effective cation exchange capacity;  $\Sigma_{B(R)}$  – total reserve bases; Ch – Chlorite; Gi – gibbsite; Go – goethite; He – Haematite; Il – Illite; Ka – kaolinite; Mi – Mica; Mu – Muscovite; Or/K - orthoclase/K-feldspar; Pl – Plagioclase; Sm – Smectite, Albite – Al, Microcline – Mc. – ND – not determined. Soils from the Arenic group (Arenosols/Podzols) followed by F indicate seasonally flooded white sands. For the mineralogies, blank columns indicate that measurements were not made; \* = identification uncertain; 0 – none identified. Sites have been numbered and ordered according to their upper layer (0.0-0.3m) soil C content as given in Table A1 (Appendix).**

| Soil | Classification         | Location            | $T_A$<br>(°C) | $P_A$<br>(mm) | $E_V$<br>(m) | pH   | Particle fraction |      |      | $\Sigma_B$ | $I_E$ | $\Sigma_{B(R)}$ | Mineralogy                |                      |
|------|------------------------|---------------------|---------------|---------------|--------------|------|-------------------|------|------|------------|-------|-----------------|---------------------------|----------------------|
|      |                        |                     |               |               |              |      | Sand              | Clay | Silt |            |       |                 | (mmolc kg <sup>-1</sup> ) |                      |
| 1    | Plinthosols            | Brazil, Acre        | 25,1          | 1705,1        | 260          | 4,57 | 0,61              | 0,16 | 0,22 | 7,1        | 13,2  | 189,3           | Ka                        | Mu, Go, He           |
| 2    | Gleysols               | Peru, North         | 26,3          | 2751,5        | 126          | 4,26 | 0,53              | 0,21 | 0,27 | 4,0        | 36,2  | 40,6            | Mi                        | Ka                   |
| 3    | Cambisols              | Peru, South         | 25,2          | 2457,0        | 358          | 4,53 | 0,23              | 0,36 | 0,41 | 11,0       | 15,4  | 206,5           | Ka                        | Or/K, Mu, Ch         |
| 4    | Podzols <sup>F</sup>   | Brazil, Roraima     | 27,9          | 1836,0        | 46           | 4,91 | 0,78              | 0,05 | 0,17 | 1,1        | 2,8   | 20,1            |                           |                      |
| 5    | Plinthosols            | Brazil, Acre        | 25,0          | 1689,5        | 259          | 4,45 | 0,62              | 0,17 | 0,22 | 7,4        | 14,1  | 215,0           | Mu                        | Ka, Gi, He           |
| 6    | Ferralsols             | Venezuela           | 28,0          | 2382,0        | 70           | 4,68 | 0,79              | 0,16 | 0,06 | 1,1        | 5,8   | 20,6            |                           |                      |
| 7    | Alisols                | Peru, South         | 25,4          | 2457,6        | 216          | 4,21 | 0,40              | 0,22 | 0,38 | 7,5        | 23,0  | 463,6           |                           |                      |
| 8    | Podzols                | Brazil, Amazonas    | 27,1          | 2289,2        | 92           | 4,10 | 0,96              | 0,02 | 0,02 | 3,1        | 20,1  | 3,1             | Pl                        | He, Ch               |
| 9    | Alisols                | Peru, South         | 25,3          | 2536,5        | 216          | 4,41 | 0,18              | 0,29 | 0,53 | 5,7        | 29,6  | 362,1           | Il-Sm                     | Mi, Ka, Al, Go, Gi   |
| 10   | Regosol                | Brazil, Mato Grosso | 25,6          | 2353,1        | 280          | 5,34 | 0,77              | 0,12 | 0,11 | 20,2       | 22,3  | 109,0           | Ka                        | Gi, He, Or/K         |
| 11   | Acrisols               | Brazil, Pará        | 26,8          | 2191,6        | 55           | 3,74 | 0,84              | 0,11 | 0,06 | 0,2        | 1,3   | 44,7            |                           |                      |
| 12   | Acrisols               | Brazil, Acre        | 26,0          | 1919,8        | 194          | 4,13 | 0,62              | 0,23 | 0,15 | 6,2        | 9,1   | 85,1            |                           |                      |
| 13   | Ferralsols             | Venezuela           | 28,1          | 2337,0        | 58           | 4,16 | 0,85              | 0,14 | 0,02 | 1,3        | 7,6   | 21,7            |                           |                      |
| 14   | Ferralsols             | Brazil, Mato Grosso | 25,5          | 1613,1        | 352          | 4,20 | 0,78              | 0,16 | 0,06 | 1,5        | 5,8   | 38,2            | Ka                        | Gi, Go, He           |
| 15   | Luvissols              | Peru, South         | 25,2          | 2457,0        | 358          | 6,12 | 0,29              | 0,08 | 0,63 | 32,9       | 36,3  | 326,3           | Mu                        | Ka, Pl, Or/K, He, Gi |
| 16   | Gleysols               | Brazil, Roraima     | 27,2          | 1839,0        | 60           | 4,40 | 0,73              | 0,17 | 0,10 | 4,2        | 8,3   | 41,1            |                           |                      |
| 17   | Arenosols <sup>F</sup> | Peru, North         | 26,3          | 2751,5        | 127          | 4,14 | 0,94              | 0,03 | 0,04 | 1,7        | 4,0   | 13,0            | Il-Sm                     | Ka                   |
| 18   | Ferralsols             | Brazil, Pará        | 26,7          | 2211,9        | 35           | 4,09 | 0,73              | 0,22 | 0,04 | 2,4        | 10,6  | 63,7            |                           |                      |
| 19   | Plinthosols            | Brazil, Acre        | 25,9          | 1907,0        | 203          | 4,23 | 0,19              | 0,18 | 0,62 | 10,2       | 29,2  | 145,9           | Il-Sm                     | Ka                   |
| 20   | Alisols                | Peru, South         | 25,4          | 2457,6        | 216          | 4,32 | 0,20              | 0,40 | 0,40 | 7,0        | 35,6  | 578,0           | Il-Sm                     | Mi, Ka, Al           |
| 21   | Gleysols               | Peru, South         | 25,4          | 2457,6        | 217          | 4,05 | 0,17              | 0,39 | 0,44 | 3,4        | 41,4  | 486,0           | Mi                        | Ka, Il-Sm, Al        |
| 22   | Arenosols              | Guyana              | 26,4          | 2813,3        | 125          | 4,73 | 0,96              | 0,02 | 0,02 | 2,5        | 3,4   | 8,0             |                           |                      |
| 23   | Plinthosols            | Brazil, Amazonas    | 26,4          | 2593,7        | 71           | 3,98 | 0,26              | 0,20 | 0,54 | 1,2        | 10,1  | 44,5            |                           |                      |
| 24   | Ferralsols             | Brazil, Pará        | 26,7          | 2211,9        | 44           | 4,02 | 0,80              | 0,14 | 0,06 | 2,0        | 6,4   | 52,2            |                           |                      |
| 25   | Plinthosols            | Brazil, Mato Grosso | 25,3          | 1509,7        | 281          | 4,65 | 0,66              | 0,24 | 0,10 | 7,4        | 12,7  | 51,3            | Ka                        | Gi, He               |
| 26   | Ferralsols             | Brazil, Mato Grosso | 25,0          | 1854,4        | 326          | 4,19 | 0,86              | 0,10 | 0,04 | 1,2        | 12,1  | 9,5             | Ka                        | Gi, Mi               |

| Soil | Classification       | Location            | $T_A$<br>(°C) | $P_A$<br>(mm) | $E_V$<br>(m) | pH   | Particle fraction |      |      | $\Sigma_B$ | $I_E$ | $\Sigma_{B(R)}$ | Mineralogy                            |                  |
|------|----------------------|---------------------|---------------|---------------|--------------|------|-------------------|------|------|------------|-------|-----------------|---------------------------------------|------------------|
|      |                      |                     |               |               |              |      | Sand              | Clay | Silt |            |       |                 | (mmol <sub>c</sub> kg <sup>-1</sup> ) | 1°               |
| 27   | Acrisols             | Bolivia             | 23,3          | 1142,6        | 447          | 5,88 | 0,75              | 0,10 | 0,14 | 17,8       | 18,2  | 230,1           | Ka                                    | Gi,He, Or/K, Pl  |
| 28   | Cambisols            | Bolivia             | 24,8          | 813,4         | 310          | 6,06 | 0,48              | 0,18 | 0,35 | 51,3       | 51,6  | 679,7           | Ka                                    | Gi, Go, He, Mu   |
| 29   | Ferralsols           | Bolivia             | 23,9          | 1451,2        | 299          | 4,63 | 0,74              | 0,20 | 0,06 | 1,6        | 12,5  | 48,8            | Ka                                    | Gi, Go, He, Pl   |
| 30   | Arenosols            | Peru, North         | 26,3          | 2751,5        | 126          | 4,07 | 0,82              | 0,02 | 0,16 | 4,2        | 4,9   | 4,1             | Mu*                                   | Ch               |
| 31   | Acrisols             | Guyana              | 26,4          | 2813,3        | 124          | 4,24 | 0,81              | 0,15 | 0,05 | 3,4        | 10,0  | 17,6            |                                       |                  |
| 32   | Fluvisols            | Peru, South         | 25,1          | 2399,4        | 381          | 5,08 | 0,02              | 0,48 | 0,50 | 64,9       | 65,7  | 435,1           |                                       |                  |
| 33   | Plinthosols          | Brazil, Acre        | 25,9          | 1946,3        | 205          | 5,19 | 0,18              | 0,20 | 0,63 | 31,0       | 41,8  | 546,4           |                                       |                  |
| 34   | Plinthosols          | Brazil, Amazonas    | 26,3          | 2553,3        | 70           | 4,01 | 0,22              | 0,19 | 0,59 | 4,2        | 14,4  | 62,7            |                                       |                  |
| 35   | Plinthosols          | Brazil, Amazonas    | 26,3          | 2553,3        | 70           | 3,94 | 0,14              | 0,13 | 0,73 | 4,6        | 16,0  | 44,0            |                                       |                  |
| 36   | Acrisols             | Brazil, Pará        | 26,8          | 2178,1        | 38           | 3,96 | 0,24              | 0,46 | 0,30 | 2,6        | 15,6  | 18,7            | Ka                                    | Sm               |
| 37   | Arenosols            | Guyana              | 26,7          | 2282,1        | 97           | 4,79 | 0,97              | 0,01 | 0,02 | 4,0        | 4,5   | 6,9             |                                       |                  |
| 38   | Acrisols             | Brazil, Mato Grosso | 25,6          | 2353,1        | 274          | 4,65 | 0,79              | 0,11 | 0,10 | 15,7       | 20,4  | 66,8            | Ka                                    | Gi               |
| 39   | Alisols              | Peru, South         | 25,3          | 2536,5        | 216          | 5,06 | 0,02              | 0,46 | 0,52 | 49,9       | 56,7  | 978,3           | Ka                                    | Mu, Or/K, Ch, He |
| 40   | Ferralsols           | Bolivia             | 24,2          | 1456,7        | 198          | 4,70 | 0,58              | 0,36 | 0,06 | 13,2       | 20,1  | 36,5            | Ka                                    | Gi, Sm           |
| 41   | Ferralsols           | Brazil, Pará        | 26,8          | 2191,6        | 43           | 4,23 | 0,52              | 0,39 | 0,09 | 2,7        | 13,6  | 77,7            |                                       |                  |
| 42   | Plinthosols          | Colombia            | 25,8          | 2804,1        | 106          | 4,50 | 0,21              | 0,42 | 0,37 | 10,0       | 62,1  | 327,0           | Il-Sm                                 | Ka, Mi           |
| 43   | Acrisols             | Guyana              | 25,7          | 2932,2        | 124          | 4,44 | 0,82              | 0,13 | 0,05 | 2,8        | 10,9  | 31,0            |                                       |                  |
| 44   | Ferralsols           | Guyana              | 26,6          | 2633,8        | 108          | 4,25 | 0,79              | 0,18 | 0,03 | 2,7        | 13,0  | 21,8            |                                       |                  |
| 45   | Ferralsols           | Guyana              | 26,6          | 2633,8        | 106          | 4,03 | 0,76              | 0,20 | 0,04 | 2,9        | 11,2  | 22,0            |                                       |                  |
| 46   | Acrisols             | Brazil, Pará        | 26,8          | 2178,1        | 40           | 4,00 | 0,64              | 0,25 | 0,11 | 3,0        | 18,1  | 10,8            | Ka                                    | Gi               |
| 47   | Lixisols             | Venezuela           | 25,3          | 1364,4        | 291          | 5,43 | 0,71              | 0,10 | 0,19 | 17,8       | 17,9  | 45,2            | Ka                                    | Sm, Mi           |
| 48   | Cambisols            | Peru, North         | 26,3          | 2805,5        | 97           | 5,15 | 0,10              | 0,28 | 0,62 | 50,7       | 57,2  | 496,4           | Il-Sm                                 | Ka, Mi, Al, Mc   |
| 49   | Plinthosols          | Venezuela           | 25,8          | 2810,2        | 98           | 4,13 | 0,38              | 0,31 | 0,31 | 2,8        | 44,4  | 233,4           | Il-Sm                                 | Ka, Mi, Gi       |
| 50   | Podzols <sup>F</sup> | Brazil, Amazonas    | 27,1          | 2289,2        | 100          | 4,73 | 0,89              | 0,09 | 0,02 | 1,3        | 3,1   | 1,6             |                                       |                  |
| 51   | Gleysols             | Venezuela           | 28,0          | 2499,0        | 89           | 4,61 | 0,83              | 0,14 | 0,03 | 1,9        | 8,8   | 20,4            |                                       |                  |
| 52   | Cambisols            | Brazil, Acre        | 25,7          | 1803,7        | 278          | 5,56 | 0,39              | 0,25 | 0,35 | 73,7       | 73,7  | 564,9           | Ka                                    | Pl, Or/K, Mu, He |
| 53   | Alisols              | Bolivia             | 25,0          | 3076,8        | 229          | 4,24 | 0,43              | 0,25 | 0,32 | 4,8        | 18,0  | 304,4           |                                       |                  |
| 54   | Plinthosols          | Colombia            | 25,8          | 2804,1        | 107          | 4,29 | 0,19              | 0,43 | 0,38 | 10,2       | 62,60 | 385,1           | Il-Sm                                 |                  |
| 55   | Cambisols            | Peru, South         | 25,4          | 2457,6        | 219          | 4,22 | 0,47              | 0,29 | 0,24 | 2,2        | 33,80 | 185,1           | Il-Sm                                 | Ka, Mi, Gi       |
| 56   | Cambisols            | Ecuador             | 24,9          | 3172,3        | 261          | 4,95 | 0,47              | 0,30 | 0,23 | 77,9       | 84,80 | 928,5           | Il-Sm                                 | Ka               |
| 57   | Ferralsols           | Bolivia             | 23,9          | 1451,2        | 300          | 4,39 | 0,73              | 0,21 | 0,06 | 1,7        | 15,2  | 50,1            | Ka                                    | Gi, He, Mu       |
| 58   | Alisols              | Brazil, Rondônia    | 27,2          | 2208,0        | 78           | 3,81 | 0,20              | 0,34 | 0,46 | 2,0        | 30,0  | 78,6            |                                       |                  |
| 59   | Plinthosols          | Brazil, Acre        | 25,9          | 1907,0        | 205          | 5,07 | 0,16              | 0,25 | 0,59 | 50,0       | 56,2  | 345,3           | Il-Sm                                 | Mi, Ka           |
| 60   | Cambisols            | Peru, South         | 25,6          | 2095,9        | 203          | 5,60 | 0,15              | 0,25 | 0,60 | 85,5       | 86,9  | 1047,9          |                                       |                  |
| 61   | Ferralsols           | Brazil, Amazonas    | 26,9          | 2409,0        | 114          | 4,29 | 0,25              | 0,62 | 0,13 | 2,6        | 16,6  | 45,0            |                                       |                  |
| 62   | Ferralsols           | Guyana              | 26,6          | 2633,8        | 101          | 4,37 | 0,82              | 0,15 | 0,03 | 3,6        | 12,2  | 19,4            |                                       |                  |

| Soil | Classification | Location            | $T_A$<br>(°C) | $P_A$<br>(mm) | $E_V$<br>(m) | pH   | Particle fraction |      |      | $\Sigma_B$ | $I_E$ | $\Sigma_{B(R)}$<br>(mmol <sub>c</sub> kg <sup>-1</sup> ) | Mineralogy |                  |
|------|----------------|---------------------|---------------|---------------|--------------|------|-------------------|------|------|------------|-------|----------------------------------------------------------|------------|------------------|
|      |                |                     |               |               |              |      | Sand              | Clay | Silt |            |       |                                                          | 1°         | 2°               |
| 63   | Leptosols      | French Guyana       | 25,0          | 3329,2        | 140          | 4,34 | 0,60              | 0,32 | 0,08 | 4,5        | 24,0  | 74,0                                                     |            |                  |
| 64   | Cambisols      | Peru, South         | 25,4          | 2457,6        | 218          | 3,91 | 0,40              | 0,44 | 0,17 | 2,2        | 44,7  | 272,8                                                    | Il-Sm      | Mi, Ka, Al, Mc   |
| 65   | Alisols        | Colombia            | 25,8          | 2777,6        | 120          | 4,13 | 0,58              | 0,20 | 0,22 | 2,4        | 26,0  | 80,1                                                     | Ka         | Il-Sm, Mi, Gi    |
| 66   | Alisols        | Brazil, Rondônia    | 27,2          | 2208,0        | 83           | 3,82 | 0,27              | 0,26 | 0,48 | 1,2        | 29,3  | 75,0                                                     |            |                  |
| 67   | Arenosols      | Guyana              | 26,8          | 2158,5        | 102          | 4,53 | 0,90              | 0,01 | 0,09 | 3,0        | 7,8   | 28,3                                                     |            |                  |
| 68   | Ferralsols     | French Guyana       | 24,9          | 3329,2        | 140          | 4,40 | 0,52              | 0,38 | 0,10 | 4,6        | 13,2  | 72,6                                                     | Ka         | Gi, Go           |
| 69   | Alisols        | Peru, North         | 26,3          | 2805,5        | 97           | 5,20 | 0,32              | 0,27 | 0,40 | 68,8       | 92,1  | 464,1                                                    | Il-Sm      | Ka, Sm, Gi       |
| 70   | Plinthosols    | Peru, North         | 26,3          | 2814,8        | 113          | 4,55 | 0,38              | 0,47 | 0,14 | 7,9        | 37,7  | 275,4                                                    | Ka         | Il-Sm            |
| 71   | Ferralsols     | Brazil, Mato Grosso | 25,3          | 1509,7        | 281          | 4,20 | 0,47              | 0,45 | 0,08 | 4,8        | 22,0  | 103,0                                                    | Ka         | Gi, He, Go, Or/K |
| 72   | Ferralsols     | Brazil, Pará        | 26,9          | 2197,2        | 42           | 4,03 | 0,46              | 0,48 | 0,06 | 2,7        | 17,0  | 71,1                                                     |            |                  |
| 73   | Cambisols      | Ecuador             | 24,9          | 3172,3        | 266          | 4,63 | 0,36              | 0,29 | 0,35 | 89,8       | 124,7 | 835,0                                                    | Il-Sm      | Ka, Mi           |
| 74   | Plinthosols    | Bolivia             | 25,0          | 3076,8        | 229          | 4,07 | 0,30              | 0,23 | 0,47 | 4,2        | 9,7   | 261,9                                                    |            |                  |
| 75   | Arenosols      | Guyana              | 26,8          | 2289,6        | 98           | 4,86 | 0,97              | 0,03 | 0,00 | 4,6        | 6,0   | 6,3                                                      |            |                  |
| 76   | Acrisols       | Guyana              | 26,8          | 2289,6        | 98           | 4,20 | 0,59              | 0,36 | 0,05 | 4,1        | 19,1  | 27,7                                                     |            |                  |
| 77   | Ferralsols     | Brazil, Pará        | 25,4          | 1883,1        | 145          | 3,78 | 0,23              | 0,66 | 0,10 | 4,0        | 21,4  | 10,7                                                     | Ka         | Sm               |
| 78   | Plinthosols    | Venezuela           | 25,8          | 2810,2        | 98           | 3,97 | 0,24              | 0,36 | 0,40 | 2,9        | 53,4  | 296,3                                                    | Il-Sm      | Ka, Mi, Gi       |
| 79   | Fluvisols      | Peru, South         | 25,0          | 3192,2        | 274          | 4,51 | 0,02              | 0,50 | 0,47 | 47,5       | 58,1  | 952,4                                                    |            |                  |
| 80   | Ferralsols     | Brazil, Pará        | 26,7          | 2211,9        | 42           | 3,79 | 0,33              | 0,54 | 0,14 | 4,1        | 22,8  | 61,6                                                     | Ka         | Go, Gi           |
| 81   | Cambisols      | Peru, South         | 25,5          | 2079,3        | 203          | 5,93 | 0,05              | 0,31 | 0,64 | 78,9       | 80,7  | 1253,3                                                   |            |                  |
| 82   | Acrisols       | Guyana              | 26,8          | 2387,0        | 90           | 4,07 | 0,60              | 0,34 | 0,06 | 3,3        | 18,0  | 28,5                                                     |            |                  |
| 83   | Alisols        | Peru, North         | 26,3          | 2777,8        | 126          | 4,47 | 0,78              | 0,10 | 0,13 | 1,3        | 24,6  | 114,7                                                    | Il-Sm      | Mi, Ka           |
| 84   | Plinthosols    | Venezuela           | 27,9          | 2510,0        | 114          | 4,44 | 0,63              | 0,30 | 0,07 | 2,6        | 10,0  | 21,1                                                     |            |                  |
| 85   | Alisols        | Brazil, Rondônia    | 27,7          | 923,5         | 83           | 3,64 | 0,48              | 0,34 | 0,18 | 1,6        | 23,8  | 40,4                                                     |            |                  |
| 86   | Plinthosols    | Peru, North         | 26,3          | 2751,5        | 127          | 4,46 | 0,33              | 0,34 | 0,33 | 10,8       | 51,3  | 94,0                                                     | Il-Sm      | Ka, Gi           |
| 87   | Alisols        | Ecuador             | 25,3          | 3008,9        | 237          | 4,61 | 0,43              | 0,34 | 0,23 | 33,8       | 51,0  | 441,8                                                    | Ka         | Il-Sm, Mi        |
| 88   | Acrisols       | Peru, North         | 26,3          | 2814,8        | 113          | 4,42 | 0,32              | 0,46 | 0,22 | 5,4        | 37,1  | 224,9                                                    | Ka         | Sm, Gi           |
| 89   | Alisols        | Brazil, Rondônia    | 26,2          | 2205,4        | 78           | 3,63 | 0,47              | 0,18 | 0,35 | 1,5        | 23,1  | 32,6                                                     |            |                  |
| 90   | Gleysols       | Peru, North         | 26,7          | 2645,1        | 140          | 4,31 | 0,62              | 0,16 | 0,22 | 4,1        | 17,8  | 172,0                                                    | Ka         | He               |
| 91   | Gleysols       | Ecuador             | 25,3          | 3008,9        | 235          | 4,39 | 0,03              | 0,57 | 0,40 | 71,0       | 78,3  | 832,3                                                    | Il-Sm      | Ka, Sm           |
| 92   | Cambisols      | Peru, South         | 25,5          | 2079,3        | 203          | 6,07 | 0,05              | 0,42 | 0,52 | 68,2       | 68,2  | 1225,3                                                   | Mica       | Il, Ka           |
| 93   | Acrisols       | Venezuela           | 26,2          | 3425,0        | 109          | 4,79 | 0,88              | 0,08 | 0,03 | 3,0        | 12,2  | 6,5                                                      | Ka         | Gi, Mi           |
| 94   | Acrisols       | Bolivia             | 24,1          | 1270,3        | 268          | 6,30 | 0,49              | 0,31 | 0,20 | 21,3       | 22,2  | 209,0                                                    | Ka         | He, Pl           |
| 95   | Ferralsols     | Brazil, Amazonas    | 27,1          | 2289,2        | 100          | 4,34 | 0,08              | 0,85 | 0,05 | 1,9        | 21,4  |                                                          |            |                  |
| 96   | Alisols        | Peru, North         | 26,3          | 2814,8        | 114          | 3,99 | 0,38              | 0,18 | 0,45 | 3,8        | 29,9  | 185,2                                                    |            |                  |
| 97   | Cambisols      | Bolivia             | 24,3          | 1066,0        | 373          | 5,23 | 0,55              | 0,18 | 0,26 | 60,7       | 61,9  | 283,4                                                    |            |                  |
| 98   | Ferralsols     | Brazil, Amazonas    | 27,0          | 2444,4        | 111          | 4,17 | 0,30              | 0,59 | 0,11 | 2,9        | 12,4  | 34,9                                                     |            |                  |

| Soil | Classification       | Location            | $T_A$<br>(°C) | $P_A$<br>(mm) | $E_V$<br>(m) | pH   | Particle fraction |      |      | $\Sigma_B$ | $I_E$ | $\Sigma_{B(R)}$<br>(mmol <sub>c</sub> kg <sup>-1</sup> ) | Mineralogy |                  |
|------|----------------------|---------------------|---------------|---------------|--------------|------|-------------------|------|------|------------|-------|----------------------------------------------------------|------------|------------------|
|      |                      |                     |               |               |              |      | Sand              | Clay | Silt |            |       |                                                          | 1°         | 2°               |
| 99   | Cambisols            | Brazil, Roraima     | 27,0          | 1855,0        | 153          | 4,25 | 0,43              | 0,36 | 0,22 | 9,5        | 16,1  | 120,0                                                    |            |                  |
| 100  | Acrisols             | Venezuela           | 26,2          | 3425,0        | 99           | 5,03 | 0,89              | 0,05 | 0,06 | 1,8        | 11,3  | 1,9                                                      | Ka         | Sm, Mi           |
| 101  | Alisols              | Ecuador             | 23,8          | 3710,7        | 431          | 4,49 | 0,40              | 0,33 | 0,27 | 11,1       | 26,6  | 333,9                                                    | Ka         | Mi, Gi           |
| 102  | Alisols              | Peru, North         | 26,3          | 2814,8        | 113          | 4,03 | 0,39              | 0,46 | 0,15 | 3,0        | 30,7  | 85,4                                                     |            |                  |
| 103  | Alisols              | Brazil, Rondônia    | 26,2          | 2205,4        | 87           | 3,84 | 0,60              | 0,17 | 0,24 | 1,8        | 19,7  | 32,1                                                     |            |                  |
| 104  | Luvisols             | Brazil, Acre        | 25,7          | 1883,8        | 228          | 4,26 | 0,14              | 0,55 | 0,31 | 25,8       | 45,9  | 461,1                                                    |            |                  |
| 105  | Alisols              | Ecuador             | 23,8          | 3710,7        | 432          | 4,77 | 0,41              | 0,29 | 0,30 | 20,4       | 30,5  | 330,2                                                    | Ka         | Mi               |
| 106  | Ferralsols           | Brazil, Amazonas    | 27,1          | 2245,7        | 95           | 4,24 | 0,16              | 0,68 | 0,16 | 2,4        | 28,1  | 4,7                                                      | Ka         | Sm, Gi           |
| 107  | Acrisols             | Peru, North         | 26,8          | 2630,0        | 122          | 3,98 | 0,44              | 0,22 | 0,34 | 2,6        | 20,2  | 68,8                                                     | Ka         | Go, Gi           |
| 108  | Gleysols             | Colombia            | 25,8          | 2799,9        | 120          | 4,34 | 0,32              | 0,34 | 0,34 | 5,5        | 35,1  | 150,0                                                    | Ka         | Mu, Gi, He, Go   |
| 109  | Gleysols             | Brazil, Roraima     | 27,3          | 1840,0        | 62           | 4,51 | 0,78              | 0,15 | 0,06 | 2,6        | 7,3   | 22,3                                                     |            |                  |
| 110  | Plinthosols          | Brazil, Amazonas    | 26,4          | 2593,7        | 71           | 4,00 | 0,36              | 0,18 | 0,45 | 1,9        | 14,9  | 47,3                                                     |            |                  |
| 111  | Ferralsols           | Brazil, Amazonas    | 27,1          | 2245,7        | 93           | 3,98 | 0,09              | 0,78 | 0,13 | 3,5        | 21,6  | 42,1                                                     |            |                  |
| 112  | Ferralsols           | Brazil, Amapá       | 26,8          | 2377,1        | 80           | 4,05 | 0,04              | 0,81 | 0,15 | 5,3        | 21,5  | 25,5                                                     | Ka         | Gi               |
| 113  | Cambisols            | Peru, South         | 25,5          | 2079,3        | 203          | 5,96 | 0,08              | 0,31 | 0,61 | 80,1       | 81,2  | 1304,2                                                   |            |                  |
| 114  | Cambisols            | Brazil, Acre        | 25,8          | 1652,5        | 236          | 5,92 | 0,25              | 0,37 | 0,38 | 80,3       | 80,4  | 845,6                                                    | Ka         | Mu, Pl, Or/K, He |
| 115  | Alisols              | Brazil, Roraima     | 27,3          | 1841,0        | 126          | 4,08 | 0,33              | 0,44 | 0,23 | 3,8        | 16,4  | 73,9                                                     |            |                  |
| 116  | Fluvisols            | Peru, South         | 25,2          | 2477,1        | 356          | 6,72 | 0,01              | 0,45 | 0,54 | 85,3       | 85,9  | 1688,1                                                   | Ka         | Mu, Ch, Pl, Go   |
| 117  | Ferralsols           | Brazil, Amazonas    | 27,1          | 2193,2        | 110          | 4,27 | 0,13              | 0,46 | 0,41 | 1,9        | 17,5  | 24,3                                                     |            |                  |
| 118  | Acrisols             | French Guyana       | 24,9          | 3329,2        | 140          | 4,16 | 0,33              | 0,57 | 0,10 | 5,3        | 21,3  | 31,2                                                     |            |                  |
| 119  | Ferralsols           | Brazil, Pará        | 26,9          | 2175,8        | 43           | 4,13 | 0,23              | 0,68 | 0,09 | 2,7        | 8,5   | 70,5                                                     |            |                  |
| 120  | Ferralsols           | Brazil, Pará        | 26,7          | 2211,6        | 45           | 4,27 | 0,14              | 0,79 | 0,08 | 3,1        | 17,7  | 68,3                                                     |            |                  |
| 121  | Ferralsols           | Brazil, Amazonas    | 27,1          | 2193,2        | 112          | 4,14 | 0,10              | 0,69 | 0,20 | 1,0        | 11,3  | 30,2                                                     |            |                  |
| 122  | Alisols              | Ecuador             | 23,8          | 3710,7        | 431          | 4,37 | 0,42              | 0,31 | 0,28 | 9,0        | 32,4  | 288,2                                                    | Ka         | Mi, Il-Sm        |
| 123  | Podzols <sup>F</sup> | Colombia            | 25,8          | 2799,9        | 120          | 4,27 | 0,75              | 0,01 | 0,25 | 6,4        | 7,1   | 3,3                                                      | Mu         | Ch               |
| 124  | Cambisols            | Bolivia             | 24,3          | 1066,0        | 373          | 6,84 | 0,58              | 0,19 | 0,23 | 75,6       | 75,9  | 566,7                                                    |            |                  |
| 125  | Fluvisols            | Peru, South         | 25,2          | 2457,0        | 356          | 6,41 | 0,48              | 0,52 | 0,00 | 84,5       | 85,2  | 1688,7                                                   | Mu         | Ka, Ch, Or/K, Pl |
| 126  | Ferralsols           | Brazil, Pará        | 25,1          | 2015,9        | 197          | 3,84 | 0,03              | 0,89 | 0,08 | 6,4        | 29,7  | 16,6                                                     | Ka         | 0                |
| 127  | Ferralsols           | Brazil, Mato Grosso | 25,1          | 1665,8        | 373          | 4,10 | 0,46              | 0,49 | 0,05 | 2,3        | 19,5  | 28,3                                                     | Ka         | Gi, Go, He, Mu   |
| 128  | Acrisols             | French Guyana       | 24,9          | 3329,2        | 140          | 4,76 | 0,12              | 0,68 | 0,20 | 10,9       | 15,5  | 87,9                                                     | Ka         | Gi, Go           |
| 129  | Lixisols             | French Guyana       | 24,9          | 3329,2        | 140          | 4,85 | 0,18              | 0,65 | 0,17 | 13,6       | 16,9  | 65,5                                                     |            |                  |
| 130  | Ferralsols           | Brazil, Amazonas    | 27,1          | 2289,2        | 106          | 3,94 | 0,20              | 0,68 | 0,12 | 3,7        | 21,9  | 5,0                                                      | Ka         | 0                |
| 131  | Ferralsols           | Brazil, Amazonas    | 27,1          | 2193,2        | 105          | 3,56 | 0,08              | 0,54 | 0,38 | 2,4        | 11,6  | 30,0                                                     |            |                  |
| 132  | Lixisols             | French Guyana       | 24,9          | 3329,2        | 140          | 4,74 | 0,17              | 0,62 | 0,21 | 16,2       | 17,4  | 64,2                                                     |            |                  |
| 133  | Acrisols             | Brazil, Amazonas    | 26,9          | 2457,9        | 119          | 4,29 | 0,08              | 0,81 | 0,11 | 2,7        | 15,4  | 43,3                                                     |            |                  |
| 134  | Ferralsols           | Brazil, Amazonas    | 27,1          | 2245,7        | 93           | 4,08 | 0,10              | 0,80 | 0,10 | 4,9        | 19,8  | 8,6                                                      |            |                  |

| Soil | Classification       | Location        | $T_A$<br>(°C) | $P_A$<br>(mm) | $E_V$<br>(m) | pH   | Particle fraction |      |      | $\Sigma_B$ | $I_E$ | $\Sigma_{B(R)}$ | Mineralogy                            |            |
|------|----------------------|-----------------|---------------|---------------|--------------|------|-------------------|------|------|------------|-------|-----------------|---------------------------------------|------------|
|      |                      |                 |               |               |              |      | Sand              | Clay | Silt |            |       |                 | (mmol <sub>c</sub> kg <sup>-1</sup> ) | 1°         |
| 135  | Fluvisols            | Ecuador         | 23,8          | 3710,7        | 394          | 5,09 | 0,35              | 0,32 | 0,34 | 81,7       | 81,9  | 1181,6          | Il-Sm                                 | Ka, Sm     |
| 136  | Plinthosols          | Brazil, Roraima | 27,2          | 1841,0        | 59           | 4,43 | 0,43              | 0,38 | 0,19 | 4,0        | 14,2  | 72,1            |                                       |            |
| 137  | Cambisols            | Bolivia         | 24,2          | 1383,6        | 248          | 5,67 | 0,63              | 0,18 | 0,19 | 76,5       | 76,6  | 755,3           | Il-Sm                                 | Ka, Mi     |
| 138  | Gleysols             | Brazil, Roraima | 27,2          | 1840,0        | 64           | 4,61 | 0,60              | 0,26 | 0,14 | 2,9        | 8,6   | 24,7            |                                       |            |
| 139  | Podzols <sup>F</sup> | Peru, North     | 26,3          | 2777,8        | 124          | 4,07 | 0,60              | 0,08 | 0,32 | 6,8        | 8,5   | 10,5            | Pl                                    | Ch, Ka, He |
| 140  | Cambisols            | Brazil, Roraima | 27,1          | 1846,0        | 85           | 4,02 | 0,33              | 0,43 | 0,25 | 3,1        | 15,3  | 64,0            |                                       |            |
| 141  | Leptosols            | Venezuela       | 26,3          | 2820,7        | 366          | 5,26 | 0,53              | 0,16 | 0,30 | 23,5       | 27,7  |                 |                                       |            |
| 142  | Umbrisols            | Bolivia         | 24,2          | 1456,7        | 195          | 4,74 | 0,29              | 0,36 | 0,35 | 6,6        | 25,5  | 259,7           |                                       |            |
| 143  | Umbrisols            | Bolivia         | 24,2          | 1456,7        | 195          | 4,90 | 0,29              | 0,36 | 0,35 | 8,7        | 20,8  | 179,5           | Ka                                    | Il, Mi     |
| 144  | Cambisols            | Bolivia         | 24,2          | 1383,6        | 248          | 6,17 | 0,84              | 0,07 | 0,09 | 50,7       | 52,2  | 715,1           | Mi                                    | Ka         |
| 145  | Podzols <sup>F</sup> | Venezuela       | 26,2          | 3425,0        | 99           | 4,88 |                   |      |      | 18,2       | 18,6  |                 |                                       |            |
| 146  | Gleysols             | Peru, North     | 26,3          | 2801,3        | 114          | 4,03 |                   |      |      | 6,20       | 62,3  |                 |                                       |            |
| 147  | Podzols <sup>F</sup> | Peru, North     | 26,7          | 2646,5        | 127          | 4,25 | 0,69              | 0,06 | 0,25 | 3,9        | 7,1   | 20,0            | Mu*                                   | Ch         |

**Table A1. Soil carbon and associated measures of the study soils (0.0-0.3m). [C] - C concentration; CN – carbon/nitrogen ratio;  $\rho$  – bulk density;  $\int_C$  – total soil C; Fe<sub>d</sub> – dithionite extractable iron, Fe<sub>o</sub> – oxalate extractable iron, Al<sub>d</sub> – dithionite extractable aluminium, Al<sub>o</sub> – oxalate extractable aluminium, Al<sub>p</sub> – pyrophosphate extractable aluminium**

| Soil | [C]<br>(mg g <sup>-1</sup> ) | CN    | $\rho$<br>(kg dm <sup>-3</sup> ) | $\int_C$<br>(Mg ha <sup>-1</sup> ) | g kg <sup>-1</sup> |                 |                                  |                 |                 |                 |  |
|------|------------------------------|-------|----------------------------------|------------------------------------|--------------------|-----------------|----------------------------------|-----------------|-----------------|-----------------|--|
|      |                              |       |                                  |                                    | Fe <sub>d</sub>    | Fe <sub>o</sub> | Fe <sub>d</sub> -Fe <sub>o</sub> | Al <sub>d</sub> | Al <sub>o</sub> | Al <sub>p</sub> |  |
| 1    | 5,03                         | 9,04  | 1,05                             | 14,26                              | 19,61              | 2,54            | 17,08                            | 4,71            | 2,46            | 0,60            |  |
| 2    | 6,78                         | 11,07 | 1,15                             | 119,23                             | 2,01               | 0,00            | 2,01                             | 1,79            |                 | 0,77            |  |
| 3    | 6,79                         | 7,64  | 1,43                             | 24,50                              | 3,15               | 0,80            | 2,35                             | 0,78            | 0,60            | 0,54            |  |
| 4    | 6,80                         | 22,67 | 1,30                             | 21,90                              | 0,24               | 0,19            | 0,05                             | 0,28            | 0,03            | 0,27            |  |
| 5    | 7,51                         | 10,52 | 1,17                             | 25,11                              | 13,90              | 11,57           | 2,33                             | 2,69            | 4,42            | 0,57            |  |
| 6    | 7,60                         | 12,67 | 1,11                             | 23,80                              | 4,65               | 1,13            | 3,52                             | 0,87            | 1,00            | 1,68            |  |
| 7    | 7,73                         | 7,00  | 1,27                             | 25,96                              | 11,25              | 3,44            | 7,81                             | 1,55            | 0,93            | 1,09            |  |
| 8    | 7,93                         | 15,94 | 1,34                             | 42,57                              | 0,25               | 0,22            | 0,04                             | 0,17            | 0,18            | 0,12            |  |
| 9    | 8,20                         | 7,20  | 1,26                             | 27,02                              | 11,24              | 5,43            | 5,81                             | 2,20            | 3,16            | 0,98            |  |
| 10   | 8,31                         | 9,97  | 1,21                             | 48,02                              | 4,50               | 2,38            | 2,12                             | 0,69            | 0,82            | 1,36            |  |
| 11   | 8,31                         | 13,07 | 1,40                             | 35,01                              | 8,60               | 1,61            | 6,99                             | 1,40            | 0,53            | 1,54            |  |
| 12   | 8,49                         | 7,80  | 1,29                             | 29,95                              | 17,04              | 0,66            | 16,38                            | 2,01            | 0,80            | 0,83            |  |
| 13   | 9,00                         | 12,86 | 1,17                             | 30,05                              | 5,60               | 1,11            | 4,49                             | 0,86            | 0,71            | 1,12            |  |
| 14   | 9,03                         | 14,53 | 1,03                             | 27,81                              | 20,46              | 1,02            | 19,44                            | 1,65            | 0,69            | 2,27            |  |
| 15   | 9,07                         | 8,04  | 1,38                             | 29,66                              | 6,24               | 0,62            | 5,62                             | 0,88            | 0,77            | 0,14            |  |
| 16   | 9,10                         | 13,00 | 1,33                             | 35,07                              | 14,60              | 1,43            | 13,17                            | 1,33            | 0,44            | 0,82            |  |
| 17   | 9,12                         | 14,19 | 0,89                             | 21,69                              | 0,37               | 0,34            | 0,03                             | 0,03            |                 |                 |  |
| 18   | 9,41                         | 11,88 | 1,38                             | 37,06                              | 7,65               | 0,35            | 7,30                             | 1,76            | 0,72            | 2,14            |  |
| 19   | 9,43                         | 9,34  | 1,32                             | 32,36                              | 14,40              | 4,73            | 9,67                             | 2,23            | 2,83            | 1,72            |  |
| 20   | 9,77                         | 6,71  | 1,08                             | 28,50                              | 15,43              | 6,16            | 9,27                             | 3,05            | 3,97            | 1,35            |  |
| 21   | 10,12                        | 7,29  | 1,18                             | 30,78                              | 11,04              | 7,04            | 4,00                             | 2,52            | 4,01            | 1,46            |  |
| 22   | 10,14                        | 22,79 | 1,34                             | 35,31                              | 0,30               | 0,07            | 0,23                             | 0,12            | 0,33            | 0,06            |  |
| 23   | 10,52                        | 12,57 |                                  | 21,66                              | 1,60               | 0,79            | 0,81                             | 0,49            | 0,75            | 0,80            |  |
| 24   | 10,52                        | 12,35 | 1,46                             | 43,57                              | 7,35               | 0,54            | 6,81                             | 1,77            | 0,86            | 2,17            |  |
| 25   | 10,61                        | 13,65 | 1,02                             | 32,88                              | 0,57               | 0,55            | 0,02                             | 2,78            | 1,68            | 2,94            |  |
| 26   | 10,71                        | 14,23 | 1,31                             | 39,13                              | 3,18               | 1,37            | 1,81                             | 2,49            | 6,60            | 1,16            |  |
| 27   | 10,75                        | 9,56  | 1,34                             | 45,40                              |                    |                 |                                  |                 |                 |                 |  |
| 28   | 10,76                        | 9,56  | 1,27                             | 48,91                              |                    |                 |                                  |                 |                 |                 |  |
| 29   | 10,85                        | 12,99 | 1,15                             | 33,01                              | 9,59               | 6,28            | 3,31                             | 6,47            | 13,08           | 2,11            |  |
| 30   | 11,26                        | 13,47 | 0,95                             | 16,36                              | 0,68               | 0,56            | 0,12                             | 0,24            | 0,11            | 0,03            |  |
| 31   | 11,28                        | 13,22 | 1,29                             | 38,63                              | 6,03               | 0,68            | 5,35                             | 1,69            | 0,87            | 1,69            |  |
| 32   | 11,50                        | 7,52  | 1,40                             | 38,91                              | 4,77               | 1,17            | 3,60                             | 0,79            | 0,89            | 0,21            |  |
| 33   | 11,60                        | 7,16  | 1,37                             | 33,97                              | 28,62              | 3,00            | 25,62                            | 2,54            | 1,14            | 0,86            |  |
| 34   | 11,61                        | 9,58  | 1,06                             | 55,28                              | 10,14              | 5,03            | 5,11                             | 1,65            | 0,94            | 1,16            |  |
| 35   | 11,66                        | 11,32 |                                  | 25,81                              | 0,23               | 0,15            | 0,08                             | 0,31            | 0,59            | 0,62            |  |
| 36   | 11,68                        | 16,10 | 1,43                             | 46,93                              | 7,40               | 6,43            | 0,97                             | 2,81            | 7,30            | 1,19            |  |
| 37   | 11,77                        | 22,47 | 1,23                             | 34,37                              | 1,26               | 0,09            | 1,17                             | 0,11            | 0,31            | 0,03            |  |
| 38   | 11,88                        | 10,08 | 1,31                             | 43,66                              | 6,12               | 1,83            | 4,29                             | 2,75            | 7,64            | 2,03            |  |
| 39   | 11,99                        | 7,05  | 1,25                             | 37,36                              | 14,87              | 5,20            | 9,68                             | 1,24            | 6,37            | 0,86            |  |
| 40   | 12,09                        | 11,68 | 1,01                             | 33,12                              | 11,54              | 6,37            | 5,17                             | 7,71            | 15,97           | 0,02            |  |
| 41   | 12,17                        | 11,46 | 1,05                             | 39,92                              | 10,62              | 0,68            | 9,94                             | 2,51            | 1,53            | 1,73            |  |
| 42   | 12,33                        | 8,18  | 0,85                             | 28,95                              | 20,53              | 8,55            | 11,98                            | 4,13            | 5,67            | 1,92            |  |
| 43   | 12,60                        | 12,90 | 1,23                             | 39,71                              | 4,26               | 0,96            | 3,30                             | 1,04            | 0,92            | 1,84            |  |
| 44   | 12,65                        | 14,28 | 1,24                             | 41,86                              | 6,66               | 0,69            | 5,97                             | 2,04            | 0,95            | 1,96            |  |
| 45   | 12,69                        | 11,69 | 1,35                             | 45,64                              | 6,24               | 0,96            | 5,28                             | 1,83            | 1,17            | 2,20            |  |
| 46   | 12,85                        | 16,87 | 0,99                             | 36,07                              | 6,76               | 3,14            | 3,62                             | 3,89            | 9,89            | 1,14            |  |
| 47   | 12,88                        | 11,43 | 1,47                             | 54,28                              | 76,11              | 50,27           | 25,84                            | 10,00           | 14,20           | 1,03            |  |
| 48   | 13,03                        | 8,34  | 0,97                             | 33,32                              | 35,32              | 10,88           | 24,44                            | 4,30            | 4,31            | 1,52            |  |
| 49   | 13,08                        | 9,52  | 1,07                             | 38,04                              | 11,44              | 10,08           | 1,36                             | 4,31            | 7,37            | 1,47            |  |
| 50   | 13,35                        | 17,63 |                                  | 34,87                              | 1,20               | 0,88            | 0,32                             | 1,30            | 3,16            | 3,32            |  |
| 51   | 13,40                        | 14,89 | 1,26                             | 42,55                              | 0,22               | 0,20            | 0,02                             | 0,46            | 0,82            | 0,53            |  |
| 52   | 13,54                        | 9,90  | 1,25                             | 31,89                              | 7,72               | 6,12            | 1,60                             | 1,63            | 3,48            | 0,58            |  |
| 53   | 13,65                        | 8,58  | 1,29                             | 45,24                              | 20,01              | 1,84            | 18,17                            | 3,69            | 1,66            | 2,60            |  |
| 54   | 13,73                        | 8,55  | 0,85                             | 31,36                              | 20,71              | 15,97           | 4,74                             | 5,62            | 8,85            | 1,84            |  |

| Soil | [C]<br>(mg g <sup>-1</sup> ) | CN    | $\rho$<br>(kg dm <sup>-3</sup> ) | [c<br>(Mg ha <sup>-1</sup> ) | g kg <sup>-1</sup> |                 |                                  |                 |                 |                 |
|------|------------------------------|-------|----------------------------------|------------------------------|--------------------|-----------------|----------------------------------|-----------------|-----------------|-----------------|
|      |                              |       |                                  |                              | Fe <sub>a</sub>    | Fe <sub>o</sub> | Fe <sub>a</sub> -Fe <sub>o</sub> | Al <sub>a</sub> | Al <sub>o</sub> | Al <sub>p</sub> |
| 55   | 14,18                        | 10,38 | 1,23                             | 46,31                        | 13,81              | 8,50            | 5,31                             | 6,26            | 8,99            | 2,02            |
| 56   | 14,23                        | 8,03  | 1,14                             | 41,99                        | 15,87              | 8,30            | 7,57                             | 3,83            | 6,90            | 1,22            |
| 57   | 14,25                        | 13,84 | 1,15                             | 43,24                        | 7,47               | 3,02            | 4,45                             | 4,18            | 14,53           | 3,00            |
| 58   | 14,40                        | 11,08 | 0,92                             | 44,70                        | 32,60              | 2,53            | 30,07                            | 4,76            | 1,54            | 2,63            |
| 59   | 14,41                        | 9,86  | 1,36                             | 50,54                        | 26,80              | 12,77           | 14,03                            | 2,82            | 3,72            | 3,62            |
| 60   | 14,46                        | 6,80  | 1,32                             | 40,82                        | 14,49              | 9,93            | 4,56                             | 1,34            | 1,12            | 0,41            |
| 61   | 14,87                        | 11,62 | 0,76                             | 31,39                        | 5,19               | 2,74            | 2,45                             | 1,48            | 1,20            | 0,92            |
| 62   | 14,87                        | 14,66 | 1,12                             | 46,06                        | 5,25               | 0,57            | 4,68                             | 1,72            | 1,04            | 2,99            |
| 63   | 14,93                        | 12,63 | 1,40                             | 63,47                        | 11,82              | 1,41            | 10,41                            | 3,38            | 2,10            | 2,57            |
| 64   | 15,11                        | 9,37  | 1,09                             | 43,71                        | 13,93              | 10,64           | 3,29                             | 3,23            | 8,43            | 1,87            |
| 65   | 15,11                        | 15,77 | 1,14                             | 43,09                        | 3,08               | 1,94            | 1,14                             | 2,35            | 3,91            | 1,71            |
| 66   | 15,40                        | 12,83 | 0,92                             | 40,55                        | 28,85              | 2,06            | 26,79                            | 4,32            | 1,48            | 3,21            |
| 67   | 15,44                        | 16,08 | 1,10                             | 41,04                        | 4,20               | 0,15            | 4,05                             | 0,36            | 0,48            | 0,76            |
| 68   | 15,65                        | 12,18 | 1,15                             | 49,26                        | 10,23              | 2,88            | 7,35                             | 3,13            | 3,64            | 2,95            |
| 69   | 15,68                        | 8,91  | 1,15                             | 40,69                        | 17,57              | 13,13           | 4,44                             | 3,50            | 6,65            | 1,45            |
| 70   | 15,89                        | 9,35  | 0,91                             | 37,79                        | 32,32              | 19,93           | 12,38                            | 7,68            | 12,92           | 0,67            |
| 71   | 15,92                        | 14,96 | 0,90                             | 43,15                        | 44,70              | 2,36            | 42,34                            | 4,96            | 3,16            | 4,09            |
| 72   | 15,97                        | 11,81 | 1,36                             | 57,74                        | 12,00              | 0,90            | 11,10                            | 2,62            | 1,91            | 2,43            |
| 73   | 16,01                        | 7,96  | 1,28                             | 52,90                        | 17,77              | 8,16            | 9,61                             | 4,55            | 7,43            | 2,35            |
| 74   | 16,06                        | 9,16  | 1,00                             | 38,89                        | 14,73              | 2,17            | 12,56                            | 2,85            | 1,69            | 1,92            |
| 75   | 16,16                        | 31,81 | 0,99                             | 28,95                        | 0,72               | 0,08            | 0,64                             | 0,21            | 0,26            | 0,10            |
| 76   | 16,25                        | 13,15 | 1,07                             | 46,40                        | 10,50              | 1,17            | 9,33                             | 2,75            | 1,44            | 2,37            |
| 77   | 16,40                        | 13,67 | 0,98                             | 44,21                        | 18,34              | 5,36            | 12,98                            | 5,33            | 11,12           | 0,96            |
| 78   | 16,40                        | 9,79  | 1,07                             | 45,01                        | 16,24              | 11,59           | 4,65                             | 4,68            | 7,32            | 1,80            |
| 79   | 16,79                        | 6,98  | 1,08                             | 41,36                        | 22,14              | 5,90            | 16,24                            | 2,95            | 2,86            | 1,55            |
| 80   | 16,79                        | 13,15 | 1,13                             | 51,93                        | 15,72              | 1,20            | 14,52                            | 3,47            | 1,70            | 2,42            |
| 81   | 16,85                        | 6,78  | 1,41                             | 52,47                        | 16,55              | 11,13           | 5,42                             | 1,50            | 0,86            | 0,50            |
| 82   | 17,02                        | 15,00 | 0,97                             | 43,39                        | 3,50               | 1,10            | 2,40                             | 1,98            | 2,33            | 2,01            |
| 83   | 17,11                        | 12,70 | 1,15                             | 66,72                        | 7,73               | 7,42            | 0,31                             | 2,90            | 5,58            | 1,74            |
| 84   | 17,20                        | 14,33 | 1,07                             | 46,18                        | 21,45              | 1,45            | 20,00                            | 2,12            | 1,11            | 2,51            |
| 85   | 17,32                        | 11,65 | 1,02                             | 41,95                        |                    |                 |                                  |                 |                 |                 |
| 86   | 17,35                        | 10,77 | 0,89                             | 43,74                        | 7,23               | 5,37            | 1,85                             | 3,11            | 4,57            | 1,25            |
| 87   | 17,40                        | 9,20  | 1,01                             | 44,51                        | 22,17              | 7,42            | 14,74                            | 5,49            | 8,64            | 2,01            |
| 88   | 17,84                        | 10,62 | 0,87                             | 41,30                        | 22,57              | 10,48           | 12,08                            | 5,37            | 9,32            | 2,28            |
| 89   | 17,93                        | 11,96 | 0,92                             | 70,74                        | 7,07               | 1,92            | 5,15                             | 2,18            | 1,24            | 2,04            |
| 90   | 18,02                        | 10,14 | 1,06                             | 54,78                        | 9,63               | 3,94            | 5,69                             | 1,54            | 1,85            | 1,23            |
| 91   | 18,16                        | 7,49  | 0,90                             | 38,83                        | 18,45              | 13,74           | 4,71                             | 6,13            | 12,86           | 1,81            |
| 92   | 18,35                        | 7,58  | 1,37                             | 55,53                        | 23,89              | 21,99           | 1,89                             | 4,25            | 8,34            | 0,61            |
| 93   | 18,40                        | 17,36 | 1,22                             | 64,33                        | 2,11               |                 | 2,11                             | 3,88            |                 | 2,25            |
| 94   | 18,48                        | 10,80 | 1,29                             | 69,52                        |                    |                 |                                  |                 |                 |                 |
| 95   | 18,84                        | 16,82 | 0,92                             | 48,09                        | 9,15               | 2,24            | 6,91                             | 2,13            | 1,60            | 1,87            |
| 96   | 18,97                        | 10,83 | 0,71                             | 40,47                        | 15,87              | 1,73            | 14,14                            | 3,62            | 2,06            | 12,22           |
| 97   | 19,80                        | 11,65 | 1,27                             | 67,10                        | 15,55              | 1,58            | 13,97                            | 2,54            | 1,88            | 1,26            |
| 98   | 20,05                        | 12,23 | 0,92                             | 44,10                        | 6,89               | 2,83            | 4,06                             | 2,04            | 1,52            | 1,22            |
| 99   | 20,10                        | 11,82 | 1,23                             | 71,13                        | 22,00              | 2,41            | 19,59                            | 1,83            | 0,84            | 1,23            |
| 100  | 20,49                        | 18,68 | 1,14                             | 63,59                        |                    |                 |                                  |                 |                 |                 |
| 101  | 20,87                        | 10,06 | 0,98                             | 51,94                        | 12,72              | 6,46            | 6,26                             | 5,62            | 9,49            | 2,56            |
| 102  | 21,01                        | 10,72 | 0,96                             | 52,89                        | 14,70              | 2,13            | 12,57                            | 3,60            | 2,07            | 3,68            |
| 103  | 21,40                        | 12,49 | 0,92                             | 40,49                        | 12,63              | 1,41            | 11,22                            | 3,50            | 1,24            | 2,65            |
| 104  | 21,46                        | 8,82  | 1,27                             | 57,95                        | 37,53              | 5,34            | 32,19                            | 4,70            | 3,25            | 3,72            |
| 105  | 21,53                        | 9,82  | 0,96                             | 51,38                        | 16,61              | 14,91           | 1,70                             | 6,88            | 13,92           | 1,65            |
| 106  | 21,68                        | 13,35 | 0,98                             | 60,36                        | 6,95               | 2,65            | 4,30                             | 3,39            | 7,61            | 1,61            |
| 107  | 21,76                        | 11,69 | 0,96                             | 53,12                        | 14,82              | 1,65            | 13,17                            | 3,89            | 2,05            | 4,19            |
| 108  | 21,85                        | 13,71 | 0,82                             | 38,35                        | 16,61              | 15,48           | 1,13                             | 4,51            | 10,66           | 1,79            |
| 109  | 21,90                        | 16,85 | 0,97                             | 46,77                        | 1,20               | 0,90            | 0,30                             | 0,44            | 0,80            | 0,76            |
| 110  | 21,99                        | 13,83 |                                  | 48,94                        | 16,75              | 3,54            | 13,21                            | 3,07            | 1,36            | 2,30            |
| 111  | 22,70                        | 11,65 | 0,89                             | 52,62                        | 7,70               | 2,98            | 4,72                             | 2,45            | 1,98            | 1,49            |
| 112  | 22,73                        | 13,15 | 0,99                             | 63,55                        | 19,64              | 10,34           | 9,30                             | 9,47            | 37,03           | 1,85            |
| 113  | 22,77                        | 6,82  | 1,60                             | 80,81                        | 17,42              | 11,91           | 5,51                             | 1,48            | 0,88            | 0,40            |
| 114  | 22,83                        | 10,88 | 1,27                             | 69,23                        | 10,57              | 8,53            | 2,04                             | 1,86            | 4,45            | 0,68            |
| 115  | 23,00                        | 15,33 | 0,93                             | 58,49                        | 11,41              | 2,31            | 9,10                             | 2,83            | 1,77            | 1,22            |
| 116  | 23,09                        | 9,07  | 1,15                             | 78,66                        | 23,52              | 7,08            | 16,44                            | 1,66            | 1,45            | 0,24            |



| Soil | [C]<br>(mg g <sup>-1</sup> ) | CN    | $\rho$<br>(kg dm <sup>-3</sup> ) | [c<br>(Mg ha <sup>-1</sup> ) | g kg <sup>-1</sup> |                 |                                  |                 |                 |                 |
|------|------------------------------|-------|----------------------------------|------------------------------|--------------------|-----------------|----------------------------------|-----------------|-----------------|-----------------|
|      |                              |       |                                  |                              | Fe <sub>a</sub>    | Fe <sub>o</sub> | Fe <sub>a</sub> -Fe <sub>o</sub> | Al <sub>a</sub> | Al <sub>o</sub> | Al <sub>p</sub> |
| 117  | 23,20                        | 13,47 | 0,91                             | 56,77                        | 9,02               | 2,59            | 6,43                             | 2,68            | 1,83            | 1,52            |
| 118  | 23,21                        | 12,93 | 0,98                             | 60,79                        | 26,40              | 2,12            | 24,28                            | 5,73            | 1,75            | 4,32            |
| 119  | 23,34                        | 12,53 | 0,94                             | 55,58                        | 13,50              | 1,04            | 12,46                            | 3,90            | 2,77            | 3,26            |
| 120  | 23,53                        | 11,93 | 1,09                             | 57,84                        | 19,62              | 0,87            | 18,75                            | 4,97            | 2,55            | 3,10            |
| 121  | 23,65                        | 12,24 | 0,97                             | 59,31                        | 9,75               | 2,89            | 6,86                             | 3,02            | 1,89            | 2,17            |
| 122  | 24,03                        | 10,83 | 1,05                             | 60,18                        | 12,33              | 4,92            | 7,41                             | 5,15            | 7,97            | 2,84            |
| 123  | 24,30                        | 22,03 | 1,34                             | 3,12                         | 0,60               | 0,41            | 0,19                             | 0,09            | 0,02            | 0,03            |
| 124  | 24,30                        | 11,05 | 1,27                             | 74,80                        | 16,70              | 1,36            | 15,34                            | 0,95            | 1,01            | 0,59            |
| 125  | 24,76                        | 9,49  | 1,05                             | 68,86                        | 21,66              | 6,28            | 15,38                            | 1,77            | 1,44            | 0,66            |
| 126  | 25,39                        | 15,15 | 0,77                             | 52,49                        | 14,82              | 1,09            | 13,73                            | 3,28            | 2,26            | 1,60            |
| 127  | 25,48                        | 16,20 | 0,86                             | 67,13                        | 21,55              | 2,85            | 18,70                            | 3,88            | 2,25            | 4,09            |
| 128  | 25,57                        | 11,35 | 1,13                             | 77,51                        | 36,21              | 1,60            | 34,61                            | 7,66            | 3,27            | 2,61            |
| 129  | 25,82                        | 10,79 | 0,94                             | 64,92                        | 58,14              | 2,19            | 55,95                            | 9,61            | 2,77            | 2,50            |
| 130  | 25,87                        | 17,21 | 1,02                             | 70,11                        | 8,44               | 3,55            | 4,89                             | 4,71            | 11,92           | 1,26            |
| 131  | 26,57                        | 12,57 | 0,89                             | 61,29                        | 9,71               | 3,12            | 6,59                             | 3,02            | 1,97            | 2,37            |
| 132  | 26,86                        | 9,86  | 1,03                             | 76,89                        | 53,64              | 2,19            | 51,45                            | 9,60            | 1,99            | 1,69            |
| 133  | 27,00                        | 11,82 | 0,82                             | 55,83                        | 8,72               | 3,58            | 5,14                             | 3,32            | 2,49            | 2,57            |
| 134  | 27,09                        | 11,56 | 0,93                             | 64,68                        | 7,71               | 2,64            | 5,07                             | 2,51            | 1,82            | 1,85            |
| 135  | 28,80                        | 9,05  | 0,79                             | 45,16                        | 10,39              | 9,63            | 0,76                             | 3,83            | 8,40            | 2,47            |
| 136  | 30,80                        | 15,40 | 1,18                             | 95,49                        | 67,20              | 2,03            | 65,17                            | 5,88            | 1,24            | 1,72            |
| 137  | 30,82                        | 10,75 | 0,88                             | 81,36                        | 21,34              | 12,14           | 9,20                             | 7,99            | 31,37           | 2,36            |
| 138  | 32,80                        | 14,26 | 0,88                             | 74,97                        | 3,70               | 1,41            | 2,29                             | 2,49            | 4,70            | 2,79            |
| 139  | 41,81                        | 20,72 | 0,63                             | 53,70                        | 0,24               | 0,08            | 0,16                             | 0,10            | 0,21            | 0,01            |
| 140  | 46,70                        | 16,10 | 1,36                             | 115,48                       | 21,40              | 3,17            | 18,23                            | 3,74            | 3,14            | 2,53            |
| 141  | 49,08                        | 13,36 | 1,32                             | 166,86                       | 20,10              | 2,87            | 17,23                            | 10,49           | 2,55            | 1,81            |
| 142  | 60,47                        | 11,31 |                                  |                              | 14,50              |                 |                                  | 20,27           |                 | 11,69           |
| 143  | 61,44                        | 11,77 | 0,60                             | 97,92                        | 9,02               | 8,34            | 0,67                             | 19,53           | 43,52           | 10,26           |
| 144  | 63,43                        | 12,51 | 0,43                             | 87,72                        | 11,14              | 5,25            | 5,89                             | 7,36            | 22,54           | 8,61            |
| 145  | 89,26                        | 25,82 | 1,58                             | 363,55                       | 0,36               | 0,34            | 0,02                             | 1,34            | 2,75            | 1,18            |
| 146  | 93,06                        | 12,50 | 0,89                             | 219,25                       |                    |                 |                                  |                 |                 |                 |
| 147  | 119,82                       | 20,79 | 0,34                             | 42,19                        | 0,90               | 0,10            | 0,80                             | 0,45            | 0,54            | 0,27            |

**Table 2. A guide for interpretation of selective dissolution data following Parfait and Childs (1988).**

| Form                             | description                                                                                                                                                                                                             |
|----------------------------------|-------------------------------------------------------------------------------------------------------------------------------------------------------------------------------------------------------------------------|
| Fe <sub>d</sub>                  | Dissolves almost all iron oxides not differentiating between crystalline and short-range oxides. Provides estimates of total amount of iron oxides in the soil                                                          |
| Fe <sub>o</sub>                  | Estimates short range minerals such as ferrihydrite and possibly other amorphous minerals. Do not extract crystalline oxides                                                                                            |
| Fe <sub>p</sub>                  | Extracts a variety of Fe forms, thus it does not specifically relate to any particular form of Fe in soil. Should not be used to estimate Fe-humus complexes                                                            |
| Al <sub>d</sub>                  | Probably arises from Al substitution in both crystalline and amorphous oxides, free Al and interlayer Al. Similar to Fe <sub>d</sub> it provides wide estimates of Al oxides in the soil.                               |
| Al <sub>o</sub>                  | Estimates Al in short-range minerals, such as allophane and imogolite. May also represent Al substitution in ferrihydrite and the presence of Al hydroxy interlayer minerals. Do not extract crystalline Al hydroxides. |
| Al <sub>p</sub>                  | Correspond to Al-humus complexes in most soils such as occurring in Podzols and Andosols                                                                                                                                |
| Fe <sub>d</sub> -Fe <sub>o</sub> | Provides estimation of crystalline oxides only. Excludes the content of ferrihydrite and other short-range oxides which are extracted by Fe <sub>o</sub> .                                                              |



**Table 4. Summary of OLS regression coefficients for soil organic carbon and texture associations.**

|                                                                             | <i>b</i> | <i>s.e.</i> | $\beta$ | <i>t</i> | <i>p</i> | <i>Lower</i> | <i>Upper</i> |
|-----------------------------------------------------------------------------|----------|-------------|---------|----------|----------|--------------|--------------|
| <b>a. LAC soils: <math>r^2 = 0.57, p &lt; 0.001, AIC = 292.1</math></b>     |          |             |         |          |          |              |              |
| intercept                                                                   | 9.56     | 1.03        | —       | 9.31     | 0.000    | 7.50         | 11.62        |
| Clay fraction                                                               | 17.91    | 2.15        | 0.762   | 8.32     | 0.000    | 13.60        | 22.24        |
| <b>b. LAC soils: <math>r^2 = 0.61, p &lt; 0.001, AIC = 288.6</math></b>     |          |             |         |          |          |              |              |
| intercept                                                                   | 8.50     | 1.08        | —       | 7.84     | 0.000    | 6.32         | 10.68        |
| clay fraction                                                               | 16.58    | 2.13        | 0.716   | 7.75     | 0.000    | 12.24        | 20.89        |
| silt fraction                                                               | 14.39    | 6.19        | 0.212   | 2.32     | 0.024    | 1.94         | 26.83        |
| <b>c. LAC soils: <math>r^2 = 0.61, p &lt; 0.001, AIC = 286.7</math></b>     |          |             |         |          |          |              |              |
| intercept                                                                   | 8.44     | 1.06        | -       | 7.96     | 0.000    | 6.32         | 10.57        |
| (clay + silt) fractions                                                     | 16.23    | 1.79        | 0.789   | 9.07     | 0.000    | 12.63        | 19.82        |
| <b>d. HAC soils: <math>r^2 = 0.00, p &lt; 0.335, AIC = 628.2</math></b>     |          |             |         |          |          |              |              |
| intercept                                                                   | 16.16    | 3.21        | —       | 5.04     | 0.000    | 9.78         | 22.54        |
| clay fraction                                                               | 9.58     | 9.87        | 0.088   | 0.97     | 0.335    | -10.07       | 29.22        |
| <b>e. HAC soils: <math>r^2 = 0.05, p &lt; 0.006, AIC = 625.3</math></b>     |          |             |         |          |          |              |              |
| intercept                                                                   | 21.67    | 4.02        | —       | 5.41     | 0.000    | 13.70        | 29.69        |
| clay fraction                                                               | 9.26     | 9.64        | 0.088   | 0.96     | 0.340    | -9.94        | 28.44        |
| silt fraction                                                               | -16.29   | 7.40        | -0.196  | -2.21    | 0.037    | -31.03       | -1.55        |
| <b>f. HAC soils: <math>r^2 = 0.05, p &lt; 0.259, AIC = 627.8</math></b>     |          |             |         |          |          |              |              |
| intercept                                                                   | 23.36    | 4.03        | —       | 5.81     | 0.000    | 15.35        | 31.37        |
| (clay + silt) fractions                                                     | -6.87    | 6.04        | -0.103  | -1.14    | 0.259    | -18.90       | 5.16         |
| <b>g. Arenic soils: <math>r^2 = 0.07, p &lt; 0.206, AIC = 119.92</math></b> |          |             |         |          |          |              |              |
| intercept                                                                   | 8.35     | 14.55       | —       | 0.574    | 0.579    | -24.07       | 40.77        |
| clay fraction                                                               | 431.39   | 319.17      | 0.352   | 1.352    | 0.206    | -279.75      | 1142.5       |
| <b>h. Arenic soils: <math>r^2 = 0.23, p &lt; 0.119, AIC = 118.26</math></b> |          |             |         |          |          |              |              |
| intercept                                                                   | -0.38    | 14.04       | —       | -0.03    | 0.979    | -32.13       | 31.38        |
| clay fraction                                                               | 143.77   | 80.24       | 0.254   | 1.79     | 0.107    | -37.75       | 325.30       |
| silt fraction                                                               | 228.66   | 310.22      | 0.254   | 0.74     | 0.480    | -473.18      | 930.39       |
| <b>i. Arenic soils: <math>r^2 = 0.31, p &lt; 0.035, AIC = 116.34</math></b> |          |             |         |          |          |              |              |
| intercept                                                                   | 1.09     | 12.08       | —       | 0.09     | 0.930    | -25.84       | 28.01        |
| (clay + silt) fractions                                                     | 154.67   | 63.43       | 0.225   | 2.44     | 0.035    | 13.26        | 296.07       |
| <b>j. All soils: <math>r^2 = 0.01, p &lt; 0.13, AIC = 1154.3</math></b>     |          |             |         |          |          |              |              |
| -intercept                                                                  | 16.14    | 1.96        | —       | 8.220    | 0.000    | 12.25        | 20.15        |
| -clay fraction                                                              | 7.98     | 5.23        | 0.106   | 1.524    | 0.130    | -2.37        | 18.32        |
| <b>k. All soils: <math>r^2 = 0.00, p &lt; 0.32, AIC = 1156.3</math></b>     |          |             |         |          |          |              |              |
| intercept                                                                   | 15.96    | 2.43        | —       | 6.58     | 0.000    | 11.18        | 20.79        |
| clay fraction                                                               | 7.98     | 5.25        | 0.106   | 1.52     | 0.131    | -2.41        | 18.36        |
| silt fraction                                                               | 0.68     | 6.01        | 0.007   | 0.10     | 0.917    | -11.25       | 12.51        |
| <b>l. All soils: <math>r^2 = 0.01, p &lt; 0.23, AIC = 1155.2</math></b>     |          |             |         |          |          |              |              |
| intercept                                                                   | 16.01    | 2.43        | -       | 6.59     | 0.000    | 11.20        | 20.80        |
| (clay + silt) fractions                                                     | 4.80     | 3.96        | 0.084   | 1.21     | 0.228    | -3.03        | 12.63        |

**Table 5. Summary of OLS regression coefficients for soil organic carbon and dithionite extractable Al.**

|                                                                                                      | <i>b</i> | <i>s.e.</i> | $\beta$ | <i>t</i> | <i>p</i> | <i>Lower</i> | <i>Upper</i> |
|------------------------------------------------------------------------------------------------------|----------|-------------|---------|----------|----------|--------------|--------------|
| <b><i>m.</i> LAC soils: <math>r^2 = 0.27</math>, <math>p &lt; 0.0001</math>, <i>AIC</i> = 30.26</b>  |          |             |         |          |          |              |              |
| intercept                                                                                            | 2.36     | 0.100       | —       | 23.69    | 0.000    | 2.16         | 2.57         |
| [Al] <sub>d</sub>                                                                                    | 0.372    | 0.084       |         | 4.39     | 0.000    | 0.201        | 0.542        |
| <b><i>n.</i> HAC soils: <math>r^2 = 0.23</math>, <math>p &lt; 0.0001</math>, <i>AIC</i> = 95.83</b>  |          |             |         |          |          |              |              |
| intercept                                                                                            | 2.50     | 0.08        | —       | 31.25    | 0.000    | 2.34         | 2.66         |
| log [Al] <sub>d</sub>                                                                                | 0.300    | 0.060       |         | 5.00     | 0.000    | 0.180        | 0.419        |
| <b><i>o.</i> Arenic soils: <math>r^2 = 0.09</math>, <math>p &lt; 0.17</math>, <i>AIC</i> = 37.05</b> |          |             |         |          |          |              |              |
| intercept                                                                                            | 3.42     | 0.433       | -       | 7.96     | 0.000    | 2.47         | 4.38         |
| [Al] <sub>d</sub>                                                                                    | 0.343    | 0.236       |         | 0.17     | 0.174    | -0.176       | 0.863        |
| <b><i>p.</i> All soils: <math>r^2 = 0.08</math>, <math>p &lt; 0.0004</math>, <i>AIC</i> = 200.18</b> |          |             |         |          |          |              |              |
| intercept                                                                                            | 2.69     | 0.052       |         | 52.13    | 0.000    | 2.59         | 2.79         |
| [Al] <sub>d</sub>                                                                                    | 0.141    | 0.039       |         | 3.65     | 0.000    | 0.06         | 0.217        |

**Table 6. Summary of OLS regression coefficients for soil organic carbon in HAC soils.**

|                                                                                                                         | <i>b</i> | <i>s.e.</i> | $\beta$ | <i>t</i> | <i>p</i> | <i>Lower</i> | <i>Upper</i> | <i>VIF</i> |
|-------------------------------------------------------------------------------------------------------------------------|----------|-------------|---------|----------|----------|--------------|--------------|------------|
| <b>q. HAC soils: log[C] (mg g<sup>-1</sup>), <math>r^2 = 0.32</math>, <math>p &lt; 0.001</math>, <i>AIC</i> = 78.09</b> |          |             |         |          |          |              |              |            |
| intercept                                                                                                               | 1.490    | 0.313       | —       | 4.77     | 0.000    | 0.867        | 2.113        |            |
| pH                                                                                                                      | 0.241    | 0.066       | 0.359   | 3.66     | 0.000    | 0.109        | 0.372        | 1.18       |
| log [Al] <sub>d</sub> (mg g <sup>-1</sup> )                                                                             | 0.403    | 0.071       | 0.673   | 5.66     | 0.000    | 0.261        | 0.544        | 1.62       |
| log [Fe] <sub>o</sub> (mg g <sup>-1</sup> )                                                                             | -0.156   | 0.055       | -0.347  | -2.84    | 0.006    | -0.266       | -0.047       | 1.72       |
| <b>r. HAC soils: log[C] (mg g<sup>-1</sup>), <math>r^2 = 0.55</math>, <math>p &lt; 0.001</math>, <i>AIC</i> = 46.42</b> |          |             |         |          |          |              |              |            |
| intercept                                                                                                               | -1.387   | 0.522       | —       | -2.56    | 0.010    | -2.429       | -0.344       |            |
| pH                                                                                                                      | 0.262    | 0.054       | 0.399   | 4.91     | 0.000    | 0.155        | 0.368        | 1.18       |
| log [Al] <sub>d</sub> (mg g <sup>-1</sup> )                                                                             | 0.314    | 0.059       | 0.524   | 5.30     | 0.000    | 0.195        | 0.432        | 1.71       |
| log [Fe] <sub>o</sub> (mg g <sup>-1</sup> )                                                                             | -0.010   | 0.050       | -0.018  | -0.20    | 0.844    | -0.110       | 0.090        | 2.19       |
| <u>Soil C:N ratio</u> (g g <sup>-1</sup> )                                                                              | 1.132    | 0.181       | 0.567   | 6.29     | 0.000    | 0.777        | 1.500        | 1.36       |
| <b>s. HAC soils: log[C] (mg g<sup>-1</sup>), <math>r^2 = 0.56</math>, <math>p &lt; 0.001</math>, <i>AIC</i> = 44.46</b> |          |             |         |          |          |              |              |            |
| intercept                                                                                                               | -1.417   | 0.496       | —       | -2.85    | 0.006    | -2.406       | -0.426       |            |
| pH                                                                                                                      | 0.259    | 0.050       | 0.395   | 5.12     | 0.000    | 0.158        | 0.359        | 1.08       |
| log [Al] <sub>d</sub> (mg g <sup>-1</sup> )                                                                             | 0.307    | 0.045       | 0.513   | 6.78     | 0.000    | 0.216        | 0.396        | 1.01       |
| <u>Soil C:N ratio</u> (g g <sup>-1</sup> )                                                                              | 1.155    | 0.160       | -0.573  | -7.24    | 0.000    | 0.837        | 1.474        | 1.07       |

**Table 7. Summary of coefficients from OLS regression models for HAC soils. Interactions of soil organic carbon, soil pH, leaf litter lignin content ( $\Lambda$ ) and dithionite extractable Al.**

|                                                                                                                                | <i>b</i> | <i>s.e.</i> | $\beta$ | <i>t</i> | <i>p</i> | <i>Lower</i> | <i>Upper</i> | <i>VIF</i> |
|--------------------------------------------------------------------------------------------------------------------------------|----------|-------------|---------|----------|----------|--------------|--------------|------------|
| <b><i>t.</i> HAC soils: log[C] (mg g<sup>-1</sup>), <math>r^2 = 0.38</math>, <math>p &lt; 0.001</math>, <i>AIC</i> = 42.37</b> |          |             |         |          |          |              |              |            |
| intercept                                                                                                                      | 0.887    | 0.482       | —       | 1.84     | 0.073    | -0.090       | 1.864        |            |
| pH                                                                                                                             | 0.286    | 0.091       | 0.395   | 3.13     | 0.003    | 0.101        | 0.471        | 1.09       |
| log [Al] <sub>d</sub> (mg g <sup>-1</sup> )                                                                                    | 0.469    | 0.107       | 0.673   | 4.37     | 0.000    | 0.251        | 0.687        | 1.58       |
| log [Fe] <sub>o</sub> (mg g <sup>-1</sup> )                                                                                    | -0.055   | 0.087       | -0.092  | -0.63    | 0.532    | -0.233       | 0.122        | 1.47       |
| <b><i>u.</i> HAC soils: log[C] (mg g<sup>-1</sup>), <math>r^2 = 0.46</math>, <math>p &lt; 0.001</math>, <i>AIC</i> = 38.77</b> |          |             |         |          |          |              |              |            |
| intercept                                                                                                                      | -0.488   | 2.556       | —       | -1.91    | 0.064    | -10.07       | 0.300        |            |
| pH                                                                                                                             | 0.318    | 0.087       | 0.449   | 3.62     | 0.000    | 0.140        | 0.496        | 1.12       |
| log [Al] <sub>d</sub> (mg g <sup>-1</sup> )                                                                                    | 0.415    | 0.104       | 0.584   | 3.97     | 0.000    | 0.203        | 0.626        | 1.70       |
| log [Fe] <sub>o</sub> (mg g <sup>-1</sup> )                                                                                    | 0.019    | 0.089       | 0.006   | 0.22     | 0.830    | -0.161       | 0.200        | 1.70       |
| log [ $\Lambda$ ] (mg g <sup>-1</sup> )                                                                                        | 0.942    | 0.410       | 0.341   | 2.29     | 0.027    | 0.109        | 1.774        | 1.20       |
| <b><i>v.</i> HAC soils: log[C] (mg g<sup>-1</sup>), <math>r^2 = 0.47</math>, <math>p &lt; 0.001</math>, <i>AIC</i> = 36.83</b> |          |             |         |          |          |              |              |            |
| intercept                                                                                                                      | -4.676   | 2.340       | —       | -2.00    | 0.054    | -9.417       | 0.065        |            |
| pH                                                                                                                             | 0.319    | 0.086       | 0.452   | 3.70     | 0.000    | 0.143        | 0.494        | 1.12       |
| log [Al] <sub>d</sub> (mg g <sup>-1</sup> )                                                                                    | 0.428    | 0.083       | 0.618   | 5.18     | 0.000    | 0.261        | 0.595        | 1.07       |
| log [ $\Lambda$ ] (mg g <sup>-1</sup> )                                                                                        | 0.909    | 0.377       | 0.323   | 2.41     | 0.021    | -0.145       | 1.674        | 1.04       |





**Table 9. Mean soil organic carbon stocks (0-30 cm) for 12 RGS examined in this study. Stocks from [\(Batjes, 1996\)](#)~~Batjes, (1996)~~ are also given for comparison.**

| RSG               | <i>n</i> | Soil carbon concentration  |      | Soil carbon stock          |      | SOTER-LAC estimated soil carbon stock |      |
|-------------------|----------|----------------------------|------|----------------------------|------|---------------------------------------|------|
|                   |          | Mean (mg g <sup>-1</sup> ) | C.V. | Mean (t ha <sup>-1</sup> ) | C.V. | Mean (t ha <sup>-1</sup> )            | C.V. |
| <b>Acrisol</b>    | 18       | 16.3                       | 0.35 | 49.5                       | 0.27 | 44.0                                  | 0.50 |
| <b>Alisol</b>     | 20       | 16.6                       | 0.28 | 45.6                       | 0.27 | 85.7                                  | 0.42 |
| <b>Arenosol</b>   | 6        | 12.3                       | 0.23 | 29.6                       | 0.31 | 20.7                                  | 0.50 |
| <b>Cambisol</b>   | 19       | 21.3                       | 0.63 | 58.9                       | 0.39 | 55.9                                  | 0.61 |
| <b>Ferralsol</b>  | 34       | 17.1                       | 0.35 | 47.3                       | 0.26 | 50.5                                  | 0.48 |
| <b>Fluvisol</b>   | 5        | 21.0                       | 0.33 | 54.6                       | 0.33 | 34.2                                  | 0.52 |
| <b>Gleysol</b>    | 10       | 24.5                       | 1.03 | 70.1                       | 0.84 | 67.4                                  | 0.62 |
| <b>Leptosol</b>   | 2        | 32.0                       | 0.75 | 115.2                      | 0.63 | 51.5                                  | 0.63 |
| <b>Lixosol</b>    | 3        | 21.9                       | 0.36 | 65.4                       | 0.17 | 38.5                                  | 0.45 |
| <b>Luvisol</b>    | 2        | 15.3                       | 0.57 | 43.8                       | 0.46 | 46.7                                  | 0.51 |
| <b>Plinthosol</b> | 18       | 14.2                       | 0.40 | 41.1                       | 0.44 | 34.0                                  | 0.48 |
| <b>Podzol</b>     | 7        | 48.3                       | 0.92 | 98.9                       | 1.32 | 54.9                                  | 0.54 |
